# Supplementary material for: Transplantation of Wharton's jelly mesenchymal stem cells encapsulated with Hydroactive® Gel promotes diabetic wound antifibrotic healing in type 2 diabetic rats
Source: Royal Society of Chemistry journal article supplement (doi:10.1039/d2tb01649d), 2022-01-01
Supplement: d2tb01649d3.xlsx [file d2tb01649d3.xlsx]

## Sheet: Sheet1
Primer name	Primer sequence（5'-3'）
R-Krt17-F	CAGTCCCAGCTCAGCATGAA
R-Krt17-R	CTCCACGCTGCCAATCAAAC
R-Krt25-F	CAAATGCTTGTGGCGTAGCA
R-Krt25-R	AGGCGGTCATTGAGGTTCTG
R-Krt27-F	CCTGCAAAATGACAACGCGA
R-Krt27-R	GGACCTCAAGGTCGGTTCTG
R-Krt71-F	GACTCCGCTCCGAGATTGAG
R-Krt71-R	GGCATCCTTGAGAGCACTGT
R-Fst-F	TGAAGACATCCAGTGCGGTG
R-Fst-R	CATCCGACTTACTGTCCGGG
R-Atp7a-F	CTGGCAAGGCGGAAGTAAGA
R-Atp7a-R	GGCACACGTCATTCCTCTCA
R-Runx3-F	CCCCAACTTCCTCTGCTCC
R-Runx3-R	CGGGCCACTTGGTTCTTCAT
R-Shh-F	TATGAGGGTCGAGCAGTGGA
R-Shh-R	AGTGGATGCGAGCTTTGGAT
R-Tgm3-F	ATGGCAGCCAGAAGCAGAAT
R-Tgm3-R	TCGTGACATCCATGCGAGAG
R-Adamts1-F	GGGGAGACTGCTCAAGAACC
R-Adamts1-R	ACTCGTTTGCCTTCGCAGTA
R-Adamts15-F	CAATGGCCGCCACTACTACA
R-Adamts15-R	CTAGAGAGCTGCCAGTGAGC
R-Pik3cb-F	AAAACAGAGTGCCTACCGGG
R-Pik3cb-R	TTGAAGATCACTCCCACCGC
R-Pik3ap1-F	CAGTTTGGAGAGAGAGCAGCA
R-Pik3ap1-R	CCTCACAAGCGGCTCTTTAGAA
R-Thbs1-F	GACAAGATGGAGAGCGCAGA
R-Thbs1-R	ACGTTGGTAGAACTGGAGCAG
R-Thbs4-F	CGGATGGAGACGGGATCTTG
R-Thbs4-R	GTCACAGGCATCCCCAAAGA
R-Ccl12-F	CCTTCTGCTCATAGCTGCCG
R-Ccl12-R	AGCCTCCGAATGTGGATCTTC
R-Ccl4-F	GCTGTCAGCACCAATAGGCT
R-Ccl4-R	ACATACTCATTGACCCAGGGC
R-Chi3l1-F	GAGGCCCTGAACAGGAAACT
R-Chi3l1-R	GACCGCAAAGCCTGTCAGT
R-Foxo3-F	AGGGAAGGAGCCGAGGTAG
R-Foxo3-R	GCTTGGGCTCTTGCTCTCTC
R-Hif1a-F	AAGCAGCAGGAATTGGAACG
R-Hif1a-R	TCATCCATTGACTGCCCCAG
R-Hif1an-F	ACTATGAGCGCTTCCCCAAC
R-Hif1an-R	GGTGGGAGCCCCCTTATACC
R-Hk2-F	GGTGCTGTGGCGAATCAAAG
R-HK2-R	GAGACGCTTGGCAAAATGGG
R-IFN-γ-F	GGCAAAAGGACGGTAACACG
R-IFN-γ-R	TTCACCTCGAACTTGGCGAT
R-Il10-F	TTCCCTGGGAGAGAAGCTGA
R-Il10-R	GACACCTTTGTCTTGGAGCTTA
R-Nos2-F	ACACAGTGTCGCTGGTTTGAA
R-Nos2-R	TTCTCCGTGGGGCTTGTAGT
R-Ptgs2-F	CTCAGCCATGCAGCAAATCC
R-Ptgs2-R	GGGTGGGCTTCAGCAGTAAT
R-Tnf-a-F	ATGGGCTCCCTCTCATCAGT
R-Tnf-a-R	GCTTGGTGGTTTGCTACGAC
R-VCAM1-F	AAAAGGCTCTTGTTTGCCGA
R-VCAM1-R	TCTTGGGGGAGGTGTAGACT
R-VEGFa-F	AGAAAGCCCATGAAGTGGTGA
R-VEGFa-R	CTTCATCATTGCAGCAGCCC
