# Supplementary material for: Transplantation of Wharton's jelly mesenchymal stem cells encapsulated with Hydroactive® Gel promotes diabetic wound antifibrotic healing in type 2 diabetic rats
Source: Royal Society of Chemistry journal article supplement (doi:10.1039/d2tb01649d), 2022-01-01
Supplement: d2tb01649d4.xlsx [file d2tb01649d4.xlsx]

## Sheet: Sheet1
Samples	ID	Avg_sequence_length	Clean reads	Q30(%)	GC(%)	Unique mapped reads (%)
Rat skin tissues D3 Control-1	D3CON-1	150	41320996	91.06	49	89.51
Rat skin tissues D3 Control-2	D3CON-2	150	40643930	90.92	49	89.58
Rat skin tissues D3 Control-3	D3CON-3	150	45332842	90.98	48	89.06
Rat skin tissues D3 MSC-1	D3MSC-1	150	44633142	90.89	49	89.45
Rat skin tissues D3 MSC-2	D3MSC-2	150	44956564	91.06	49	81.87
Rat skin tissues D3 MSC-3	D3MSC-3	150	44619456	90.99	48	86.05
Rat skin tissues D14 Control-1	D3CON-1	150	46738702	92.09	52	85.72
Rat skin tissues D14 Control-2	D3CON-2	150	46575882	92.56	50	81.1
Rat skin tissues D14 Control-3	D3CON-3	150	43070554	92.55	50	87.99
Rat skin tissues D14 MSC-1	D14MSC-1	150	45396610	93.03	50	87.86
Rat skin tissues D14 MSC-2	D14MSC-2	150	46798280	92.71	50	88.78
Rat skin tissues D14 MSC-3	D14MSC-3	150	44431340	91.3	57	87.12
