# Supplementary material for: Transplantation of Wharton's jelly mesenchymal stem cells encapsulated with Hydroactive® Gel promotes diabetic wound antifibrotic healing in type 2 diabetic rats
Source: Royal Society of Chemistry journal article supplement (doi:10.1039/d2tb01649d), 2022-01-01
Supplement: d2tb01649d5.xlsx [file d2tb01649d5.xlsx]

## Sheet: Sheet1
gene_symbol	gene_name	baseMean	log2FoldChange	lfcSE	stat	pvalue	padj	chrom
Adamts1	Adamts1	662.877	-1.39523	0.356424	-3.91453	9.06e-05	0.0144465	chr11
Adamts15	Adamts15	1018.65	-1.13501	0.31308	-3.6253	0.000289	0.0319321	chr8
Adgre1	Adgre1	360.341	1.47085	0.358107	4.1073	4e-05	0.00777253	chr9
Adra2a	Adra2a	108.179	-1.35744	0.423884	-3.20239	0.00136293	0.0895059	chr1
Agpat9	Agpat9	131.282	1.7657	0.478333	3.69136	0.000223	0.0262129	chr14
Ahi1	Ahi1	146.128	1.74845	0.366137	4.77541	1.79e-06	0.00100108	chr1
Alas1	Alas1	636.281	1.96702	0.496903	3.95857	7.54e-05	0.0126269	chr8
Aldoc	Aldoc	49.8179	1.42385	0.37593	3.78753	0.000152	0.021014	chr10
Alkbh5	Alkbh5	225.062	1.44202	0.305878	4.71436	2.42e-06	0.00117205	chr10
Amigo2	Amigo2	67.1164	-1.16356	0.303708	-3.83119	0.000128	0.018182	chr7
Ankrd33b	Ankrd33b	107.299	1.72272	0.542408	3.17606	0.00149291	0.0943419	chr2
Ankrd37	Ankrd37	44.7105	1.95478	0.494206	3.9554	7.64e-05	0.0126375	chr16
Ap1m2	Ap1m2	127.979	4.35217	1.2984	3.35195	0.000802	0.0656562	chr8
Apod	Apod	206.42	-2.41366	0.508805	-4.74379	2.1e-06	0.00108079	chr11
Areg	Areg	50.5511	-1.94454	0.512889	-3.79134	0.00015	0.0209104	chr14
Arg1	Arg1	1265.53	1.64821	0.373873	4.40848	1.04e-05	0.00316956	chr1
Arid3a	Arid3a	97.6359	1.73182	0.459142	3.77186	0.000162	0.0212822	chr7
Arl5b	Arl5b	242.011	2.00459	0.387379	5.17475	2.28e-07	0.000235	chr17
Arrdc3	Arrdc3	559.555	1.99112	0.462886	4.30153	1.7e-05	0.00439732	chr2
Astn2	Astn2	11.6661	-3.87809	1.22981	-3.15339	0.00161383	0.0991767	chr5
Bach1	Bach1	112.594	1.51152	0.42641	3.54476	0.000393	0.0404967	chr11
Bcl11a	Bcl11a	124.571	-1.41389	0.435511	-3.2465	0.00116831	0.0813492	chr14
Bcl2l1	Bcl2l1	603.201	1.08109	0.301752	3.5827	0.00034	0.0364463	chr3
Bnip3	Bnip3	599.83	1.55376	0.341392	4.55125	5.33e-06	0.00193096	chr1
Cass4	Cass4	79.705	1.89556	0.561508	3.37583	0.000736	0.0627974	chr3
Ccl24	Ccl24	90.3712	-2.33437	0.563653	-4.1415	3.45e-05	0.00700381	chr12
Ccl4	Ccl4	167.3	2.27895	0.580118	3.92843	8.55e-05	0.0138007	chr10
Cd163	Cd163	982.087	-2.38196	0.377195	-6.31493	2.7e-10	1.81e-06	chr4
Cd274	Cd274	71.8256	2.43564	0.564004	4.31847	1.57e-05	0.00421682	chr1
Cdh19	Cdh19	4.27307	-4.86141	1.39567	-3.48322	0.000495	0.0484467	chr13
Cdh3	Cdh3	240.201	1.63848	0.373085	4.3917	1.12e-05	0.00334836	chr19
Celsr2	Celsr2	333.027	-3.08605	0.9198	-3.35513	0.000793	0.0656025	chr2
Ciart	Ciart	53.3996	2.82035	0.485591	5.80808	6.32e-09	1.82e-05	chr2
Clca4l	Clca4l	7.56554	-2.21386	0.654945	-3.38022	0.000724	0.0621993	chr2
Clcf1	Clcf1	82.3001	-1.0292	0.317468	-3.24189	0.00118741	0.0815781	chr1
Cldn1	Cldn1	524.827	-1.53441	0.446713	-3.43488	0.000593	0.0555381	chr11
Clec10a	Clec10a	783.028	-1.67362	0.300722	-5.56533	2.62e-08	5.01e-05	chr10
Cma1	Cma1	90.5419	-1.03366	0.309609	-3.33861	0.000842	0.0657559	chr15
Cnfn	Cnfn	197.22	3.09303	0.839445	3.68461	0.000229	0.0266837	chr1
Cpa4	Cpa4	183.289	4.17558	1.30047	3.21081	0.00132361	0.0886623	chr4
Ctu2	Ctu2	132.747	-1.12222	0.345712	-3.2461	0.00116997	0.0813492	chr19
Cxcl14	Cxcl14	682.006	-2.17608	0.427444	-5.09091	3.56e-07	0.000275	chr17
Dck	Dck	119.613	2.2257	0.474003	4.69555	2.66e-06	0.00121188	chr14
Ddit3	Ddit3	310.974	1.70932	0.437863	3.90379	9.47e-05	0.0145826	chr7
Ddit4	Ddit4	700.336	2.04076	0.41747	4.88839	1.02e-06	0.000681	chr20
Degs2	Degs2	40.6493	2.20744	0.690843	3.19529	0.00139691	0.0907865	chr6
Dgat2	Dgat2	1139.02	2.10932	0.517248	4.07797	4.54e-05	0.0084531	chr1
Dot1l	Dot1l	470.629	1.2053	0.308553	3.90628	9.37e-05	0.0145826	chr7
Dusp16	Dusp16	84.7398	1.94576	0.438238	4.43997	9e-06	0.00286992	chr4
Eaf1	Eaf1	483.757	1.10076	0.319883	3.44112	0.000579	0.0546547	chr16
Efemp1	Efemp1	1102.99	-1.06287	0.326719	-3.25315	0.00114133	0.080476	chr14
Egln3	Egln3	494.49	2.48608	0.479446	5.18531	2.16e-07	0.000235	chr6
Ell	Ell	753.421	2.0481	0.45847	4.46725	7.92e-06	0.0026537	chr16
Endou	Endou	148.105	-2.94883	0.820597	-3.59351	0.000326	0.0352478	chr7
Ero1a	Ero1a	1077.86	2.54989	0.435886	5.8499	4.92e-09	1.82e-05	chr15
Fam110c	Fam110c	17.9395	-2.52166	0.602935	-4.18231	2.89e-05	0.00618327	chr6
Fam71f2	Fam71f2	57.2715	2.45162	0.778217	3.1503	0.00163101	0.0997747	chr4
Fcmr	Fcmr	50.1501	-1.44546	0.445356	-3.24562	0.00117193	0.0813492	chr13
Flnb	Flnb	1240.74	1.79902	0.3527	5.10071	3.38e-07	0.000275	chr15
Fmod	Fmod	116.849	1.28535	0.340688	3.7728	0.000161	0.0212822	chr13
Fosl2	Fosl2	401.279	1.57335	0.421491	3.73283	0.000189	0.0239305	chr6
Foxd1	Foxd1	74.8864	-4.41737	1.32131	-3.34319	0.000828	0.0657559	chr2
Foxo3	Foxo3	287.26	1.26927	0.350301	3.62337	0.000291	0.0319321	chr20
Fst	Fst	61.1226	-1.38504	0.358158	-3.86713	0.00011	0.0165765	chr2
Gab2	Gab2	95.9941	1.26687	0.385271	3.28826	0.00100809	0.0737843	chr1
Gadd45a	Gadd45a	1029.35	2.03689	0.550606	3.69936	0.000216	0.0256254	chr4
Galnt3	Galnt3	51.9697	1.68313	0.493705	3.40919	0.000652	0.0586829	chr3
Gfap	Gfap	8.42288	-5.91272	1.44874	-4.08128	4.48e-05	0.0084531	chr10
Gfpt2	Gfpt2	571.224	-1.43246	0.342322	-4.18453	2.86e-05	0.00618327	chr10
Gjb6	Gjb6	112.341	3.3319	0.971557	3.42944	0.000605	0.0558813	chr15
Gk	Gk	637.286	2.37668	0.46084	5.15727	2.51e-07	0.00024	chrX
Gla	Gla	401.806	1.12999	0.343491	3.28973	0.00100285	0.0737843	chrX
Gldn	Gldn	13.4395	-3.95101	1.204	-3.28157	0.00103229	0.0739552	chr8
Gna13	Gna13	186.443	1.62698	0.416328	3.90793	9.31e-05	0.0145826	chr10
Golga7b	Golga7b	78.7688	4.52095	1.40105	3.22683	0.00125168	0.0851207	chr1
Grem2	Grem2	88.1665	-1.0262	0.25426	-4.03604	5.44e-05	0.00971049	chr13
Hk2	Hk2	298.022	1.36362	0.284272	4.79688	1.61e-06	0.000939	chr4
Hr	Hr	1119.26	-1.6087	0.3956	-4.06648	4.77e-05	0.00875917	chr15
Hspa4l	Hspa4l	64.6932	2.28714	0.485356	4.71228	2.45e-06	0.00117205	chr2
Igsf11	Igsf11	10.5317	-5.60295	1.33645	-4.19241	2.76e-05	0.0061629	chr11
Il11	Il11	156.854	-2.09816	0.617429	-3.39821	0.000678	0.0597819	chr1
Il1a	Il1a	395.236	2.73135	0.475082	5.74921	8.97e-09	2e-05	chr3
Il1rap	Il1rap	196.441	2.03055	0.386447	5.25439	1.49e-07	0.000181	chr11
Il1rl1	Il1rl1	823.993	-1.23847	0.374766	-3.30464	0.000951	0.071574	chr9
Il1rn	Il1rn	2769.25	2.08673	0.525773	3.96888	7.22e-05	0.0122459	chr3
Insig2	Insig2	111.259	1.57828	0.34733	4.54403	5.52e-06	0.00194568	chr13
Irak2	Irak2	242.988	1.61793	0.478045	3.38447	0.000713	0.0616405	chr4
Kcnj2	Kcnj2	46.6211	2.37165	0.46292	5.12324	3e-07	0.000268	chr10
Kcnma1	Kcnma1	1329	5.06571	1.1446	4.42574	9.61e-06	0.0029945	chr15
Kdm1b	Kdm1b	475.16	2.87379	0.442466	6.49493	8.31e-11	1.11e-06	chr17
Kdm3a	Kdm3a	702.328	1.67435	0.390892	4.28341	1.84e-05	0.0046524	chr4
Kdm6b	Kdm6b	748.472	1.48367	0.400579	3.70382	0.000212	0.0254041	chr10
Kif21b	Kif21b	121.181	1.50645	0.427791	3.52146	0.000429	0.0429085	chr13
Krt17	Krt17	4123.72	1.79557	0.566581	3.16914	0.00152892	0.0952694	chr10
Lamc3	Lamc3	45.9233	-1.55921	0.377393	-4.13152	3.6e-05	0.00720595	chr3
Ldhc	Ldhc	32.2298	2.59688	0.646717	4.01548	5.93e-05	0.0104575	chr1
Lgi4	Lgi4	64.1221	-1.53982	0.377552	-4.07843	4.53e-05	0.0084531	chr1
Ltb4r	Ltb4r	123.875	1.7681	0.532118	3.32276	0.000891	0.0678474	chr15
Ltbp1	Ltbp1	1146.64	-1.09989	0.236119	-4.65818	3.19e-06	0.00133558	chr6
Lypd6b	Lypd6b	80.9745	2.68292	0.805492	3.33078	0.000866	0.067064	chr3
Lyve1	Lyve1	286.748	-1.44561	0.296582	-4.87422	1.09e-06	0.000697	chr1
Mafk	Mafk	338.401	1.30648	0.359673	3.63242	0.000281	0.0313464	chr12
Mag	Mag	4.0224	-5.32719	1.38901	-3.83524	0.000125	0.018182	chr1
Map3k9	Map3k9	55.6381	2.46687	0.566733	4.35279	1.34e-05	0.00375158	chr6
Max	Max	605.133	1.06875	0.298924	3.57533	0.00035	0.0371916	chr6
Mboat4	Mboat4	4.42036	5.46732	1.59364	3.43071	0.000602	0.0558813	chr16
Mcpt1l1	Mcpt1l1	254.382	-1.02814	0.322108	-3.19191	0.00141337	0.0910335	chr15
Mgarp	Mgarp	11.8089	1.48129	0.461165	3.21205	0.00131793	0.0886623	chr2
Mpz	Mpz	113.852	-5.02633	0.924793	-5.43508	5.48e-08	9.17e-05	chr13
Mrgprx3	Mrgprx3	9.52782	3.4531	0.737107	4.68466	2.8e-06	0.00121188	chr1
Mtmr7	Mtmr7	135.244	2.93641	0.674012	4.35662	1.32e-05	0.00375158	chr16
Mxd1	Mxd1	982.32	2.47353	0.543401	4.55194	5.32e-06	0.00193096	chr4
Nampt	Nampt	1850.79	1.21351	0.348731	3.47979	0.000502	0.0487161	chr6
Narf	Narf	334.198	1.0266	0.316996	3.23852	0.00120153	0.0821269	chr10
Ncmap	Ncmap	3.95383	-4.87532	1.44578	-3.3721	0.000746	0.0628551	chr5
Ngf	Ngf	38.3046	-1.7407	0.52972	-3.28608	0.00101592	0.0737843	chr2
Ngfr	Ngfr	32.4399	-1.6635	0.488012	-3.40873	0.000653	0.0586829	chr10
Nrg1	Nrg1	128.547	-1.85283	0.46569	-3.97869	6.93e-05	0.0120568	chr16
Olr35	Olr35	6.22748	-2.54602	0.692109	-3.67864	0.000234	0.0270801	chr1
Osbp	Osbp	1058.83	1.11645	0.267497	4.17367	3e-05	0.00618327	chr1
Osr1	Osr1	136.298	-1.40951	0.372852	-3.78035	0.000157	0.0211926	chr6
P4ha1	P4ha1	3130.65	1.47355	0.318289	4.6296	3.66e-06	0.00148735	chr20
Paqr5	Paqr5	61.2863	-1.37266	0.418135	-3.28282	0.00102776	0.0739552	chr8
Pdgfc	Pdgfc	52.1409	-1.01122	0.304625	-3.31956	0.000902	0.0682418	chr2
Pfkfb3	Pfkfb3	251.455	1.62336	0.429305	3.78136	0.000156	0.0211926	chr17
Pgf	Pgf	125.708	-1.31642	0.37929	-3.47075	0.000519	0.0496652	chr6
Pik3ap1	Pik3ap1	192.118	1.9891	0.541914	3.6705	0.000242	0.0277187	chr1
Plek	Plek	1570.85	2.82137	0.804573	3.50666	0.000454	0.0450298	chr14
Plin2	Plin2	5102.15	1.69029	0.455364	3.71196	0.000206	0.0251578	chr5
Plscr1	Plscr1	228.795	1.83002	0.434613	4.21068	2.55e-05	0.0057812	chr8
Pmp2	Pmp2	11.3393	-3.48015	0.813341	-4.27883	1.88e-05	0.00466114	chr2
Pou2f2	Pou2f2	140.497	2.16838	0.518947	4.17842	2.94e-05	0.00618327	chr1
Ppard	Ppard	315.098	1.31635	0.39158	3.36164	0.000775	0.0648756	chr20
Ppp1r15a	Ppp1r15a	841.708	1.35252	0.424272	3.18786	0.00143329	0.0914373	chr1
Ppp1r3b	Ppp1r3b	285.49	1.78429	0.462985	3.85389	0.000116	0.017115	chr16
Ppp1r3d	Ppp1r3d	199.659	1.95391	0.483676	4.03972	5.35e-05	0.00968851	chr3
Prx	Prx	54.1443	-1.02876	0.29624	-3.47274	0.000515	0.0496535	chr1
Ptgs2	Ptgs2	749.877	3.0146	0.935666	3.22188	0.00127354	0.0861695	chr13
Ptp4a1	Ptp4a1	1038.1	1.02282	0.275773	3.70893	0.000208	0.0251578	chr9
Rab11fip1	Rab11fip1	208.902	1.54316	0.462035	3.33992	0.000838	0.0657559	chr16
Rabgef1	Rabgef1	361.749	1.81397	0.363708	4.98744	6.12e-07	0.000431	chr12
Ramp3	Ramp3	61.482	-1.1181	0.334471	-3.3429	0.000829	0.0657559	chr14
Rapgef6	Rapgef6	157.057	1.51906	0.409609	3.70856	0.000208	0.0251578	chr10
Rassf7	Rassf7	71.2987	1.77109	0.558566	3.17078	0.00152028	0.0951741	chr1
Rbm47	Rbm47	92.2632	1.5062	0.449412	3.35149	0.000804	0.0656562	chr14
Rdh10	Rdh10	104.755	-1.02486	0.300277	-3.41304	0.000642	0.0585485	chr5
Rest	Rest	194.819	1.96827	0.364686	5.39717	6.77e-08	0.000101	chr14
Rhbdd1	Rhbdd1	34.2987	1.25388	0.366071	3.42524	0.000614	0.0563644	chr9
Samd8	Samd8	180.474	1.81929	0.435918	4.17346	3e-05	0.00618327	chr15
Samsn1	Samsn1	343.204	2.19389	0.492223	4.4571	8.31e-06	0.00271451	chr11
Saraf	Saraf	569.959	1.17276	0.360056	3.25716	0.00112532	0.0800487	chr16
Scd1	Scd1	1434.54	2.29283	0.725464	3.1605	0.00157499	0.0976861	chr1
Scn7a	Scn7a	41.1859	-2.68605	0.46343	-5.79601	6.79e-09	1.82e-05	chr3
Sectm1b	Sectm1b	60.4844	-2.1169	0.496765	-4.26137	2.03e-05	0.00486059	chr10
Sele	Sele	123.933	-1.40225	0.415673	-3.37345	0.000742	0.0628551	chr13
Serinc2	Serinc2	512.683	1.24523	0.374495	3.3251	0.000884	0.0678474	chr5
Sgms2	Sgms2	194.76	2.3436	0.51241	4.57367	4.79e-06	0.00183444	chr2
Slc16a11	Slc16a11	67.3443	-2.0839	0.590756	-3.52752	0.000419	0.0422846	chr10
Slc26a9	Slc26a9	19.2838	2.73383	0.724376	3.77404	0.000161	0.0212822	chr13
Slc2a1	Slc2a1	1516.04	2.01791	0.490295	4.1157	3.86e-05	0.0076049	chr5
Slc35e1	Slc35e1	437.125	1.16889	0.328971	3.55317	0.000381	0.0395281	chr16
Slc7a2	Slc7a2	156.611	2.8348	0.528652	5.36232	8.22e-08	0.00011	chr16
Slit3	Slit3	402.845	-1.17318	0.25941	-4.52248	6.11e-06	0.00209952	chr10
Slpil2	Slpil2	23.8759	2.52932	0.744071	3.39929	0.000676	0.0597819	chr3
Smox	Smox	914.879	1.76185	0.4738	3.71854	0.0002	0.0248562	chr3
Sned1	Sned1	343.462	-1.24852	0.340784	-3.66368	0.000249	0.028226	chr9
Snx18	Snx18	805.36	1.26623	0.358978	3.52732	0.00042	0.0422846	chr2
Soat1	Soat1	376.749	1.28385	0.400594	3.20487	0.00135123	0.0895059	chr13
Sostdc1	Sostdc1	125.578	-5.4474	1.28087	-4.2529	2.11e-05	0.00495971	chr6
Sox10	Sox10	23.3164	-5.12123	1.33675	-3.8311	0.000128	0.018182	chr7
Spata13	Spata13	57.5216	1.7064	0.457934	3.72631	0.000194	0.024328	chr15
Stfa2l1	Stfa2l1	119.066	4.31487	1.35925	3.17446	0.00150117	0.0944185	chr11
Sycp2	Sycp2	53.705	2.66827	0.732248	3.64394	0.000268	0.0302275	chr3
Tatdn2	Tatdn2	580.153	1.24486	0.332267	3.74657	0.000179	0.0228727	chr4
Tes	Tes	782.519	1.07342	0.337038	3.18486	0.00144822	0.0919515	chr4
Tgm1	Tgm1	438.171	2.452	0.482262	5.08437	3.69e-07	0.000275	chr15
Tgm3	Tgm3	477.913	2.85106	0.667788	4.26941	1.96e-05	0.00477397	chr3
Thbs4	Thbs4	96.2531	-1.77109	0.492058	-3.59934	0.000319	0.0347478	chr2
Tmc4	Tmc4	50.7675	2.21025	0.665132	3.32302	0.00089	0.0678474	chr1
Tmem154	Tmem154	49.6853	1.56764	0.476632	3.28899	0.00100548	0.0737843	chr2
Tmtc2	Tmtc2	87.0896	1.36138	0.3947	3.44916	0.000562	0.0534298	chr7
Tnfaip6	Tnfaip6	594.61	-2.00922	0.414044	-4.85268	1.22e-06	0.000742	chr3
Trib3	Trib3	40.8939	1.90458	0.545834	3.4893	0.000484	0.0477056	chr3
Trim69	Trim69	24.6353	1.9055	0.579713	3.28697	0.00101272	0.0737843	chr3
Ttyh1	Ttyh1	12.6921	-1.98163	0.621312	-3.18943	0.00142552	0.0913765	chr1
Tuba8	Tuba8	79.3528	2.77643	0.592535	4.68569	2.79e-06	0.00121188	chr4
Wsb1	Wsb1	2062.79	1.18399	0.332203	3.56407	0.000365	0.0382388	chr10
Xpnpep2	Xpnpep2	53.863	-1.12256	0.282603	-3.97219	7.12e-05	0.0122314	chrX
Zfp292	Zfp292	402.872	1.4759	0.347993	4.24118	2.22e-05	0.00513583	chr5
