# Supplementary material for: Transplantation of Wharton's jelly mesenchymal stem cells encapsulated with Hydroactive® Gel promotes diabetic wound antifibrotic healing in type 2 diabetic rats
Source: Royal Society of Chemistry journal article supplement (doi:10.1039/d2tb01649d), 2022-01-01
Supplement: d2tb01649d6.xlsx [file d2tb01649d6.xlsx]

## Sheet: Sheet1
gene_symbol	gene_name	baseMean	log2FoldChange	lfcSE	stat	pvalue	padj	chrom
Abca13	Abca13	2.39479	6.09566	1.83921	3.31429	0.000918754	0.455872	chr14
Abhd15	Abhd15	24.1383	1.29848	0.465774	2.78779	0.00530687	0.889285	chr10
Adamts3	Adamts3	13.6533	1.37994	0.614227	2.24664	0.0246633	1	chr14
Adgrg5	Adgrg5	74.6217	2.09608	0.66711	3.14203	0.00167784	0.59829	chr19
Adora2a	Adora2a	85.7197	1.36101	0.521854	2.60803	0.00910662	1	chr20
Aif1	Aif1	540.486	1.09796	0.3941	2.78599	0.00533641	0.889285	chr20
Akna	Akna	189.685	1.01809	0.393879	2.58478	0.00974423	1	chr5
Alox5	Alox5	98.7135	1.07543	0.37227	2.88883	0.00386675	0.796967	chr4
Ankrd1	Ankrd1	486.291	-1.14951	0.421339	-2.72824	0.00636733	0.889285	chr1
Aoah	Aoah	94.5869	1.08406	0.433925	2.49826	0.0124806	1	chr17
Apba1	Apba1	47.5454	1.1154	0.489406	2.27909	0.0226618	1	chr1
Asb5	Asb5	85.0632	-1.27103	0.550969	-2.3069	0.0210606	1	chr16
Baiap2l2	Baiap2l2	16.9944	1.06401	0.424104	2.50883	0.0121131	1	chr7
Batf3	Batf3	28.8784	1.42681	0.529499	2.69465	0.00704634	0.934652	chr13
Blk	Blk	11.7243	1.33473	0.599036	2.22812	0.0258723	1	chr15
C3	C3	201.682	1.39796	0.58178	2.4029	0.0162654	1	chr9
C3ar1	C3ar1	105.55	1.0702	0.539	1.98552	0.0470865	1	chr4
Capn13	Capn13	7.43284	2.59346	0.890745	2.91157	0.00359622	0.764739	chr6
Ccl12	Ccl12	49.7036	1.8968	0.547508	3.46443	0.000531347	0.296602	chr10
Ccl5	Ccl5	27.7116	1.87651	0.527581	3.55682	0.000375369	0.229085	chr10
Ccr4	Ccr4	1.55017	4.47332	2.1381	2.09219	0.0364215	1	chr8
Ccr5	Ccr5	233.528	1.51055	0.43498	3.47268	0.00051528	0.296602	chr8
Ccr6	Ccr6	5.33415	1.6165	0.792742	2.03912	0.041438	1	chr1
Ccr7	Ccr7	38.8712	1.99956	0.748535	2.67129	0.00755593	0.982785	chr10
Ccr9	Ccr9	2.91518	3.34872	1.62992	2.05454	0.0399239	1	chr8
Cd2	Cd2	47.259	1.42166	0.603103	2.35724	0.0184111	1	chr2
Cd22	Cd22	94.9346	1.127	0.382343	2.94761	0.00320245	0.751545	chr1
Cd226	Cd226	10.6743	1.81399	0.803665	2.25715	0.0239988	1	chr18
Cd247	Cd247	13.4621	1.89107	0.762217	2.48101	0.0131012	1	chr13
Cd27	Cd27	9.14621	2.22723	0.992804	2.24337	0.0248731	1	chr4
Cd3d	Cd3d	7.84983	2.25486	0.884559	2.54913	0.0107992	1	chr8
Cd3e	Cd3e	19.4213	2.1159	0.724343	2.92113	0.00348759	0.753601	chr8
Cd3g	Cd3g	21.9493	1.38292	0.702186	1.96946	0.0489007	1	chr8
Cd40	Cd40	55.1457	1.14108	0.514661	2.21714	0.0266134	1	chr3
Cd40lg	Cd40lg	1.69567	3.85735	1.85664	2.0776	0.037746	1	chrX
Cd5	Cd5	13.7719	1.88062	0.756954	2.48446	0.0129747	1	chr1
Cd6	Cd6	14.7372	1.16883	0.515786	2.26612	0.0234441	1	chr1
Cd7	Cd7	26.4824	1.74723	0.632502	2.76241	0.00573773	0.889285	chr10
Cd74	Cd74	5906.39	1.4579	0.335276	4.34834	1.37174e-05	0.0661918	chr18
Cd79b	Cd79b	4.27587	2.09774	0.946737	2.21576	0.0267079	1	chr10
Cd96	Cd96	4.4527	2.6736	0.946317	2.82527	0.0047241	0.855253	chr11
Cep295nl	Cep295nl	12.7793	1.57376	0.74719	2.10624	0.0351839	1	chr10
Chrna1	Chrna1	131.299	-2.28335	0.598784	-3.81331	0.000137119	0.141306	chr3
Chrnd	Chrnd	107.365	-1.56386	0.513676	-3.04444	0.00233113	0.700779	chr9
Chrng	Chrng	71.9718	-1.51004	0.512531	-2.94625	0.00321656	0.751545	chr9
Chst13	Chst13	8.73316	2.15765	0.780706	2.76372	0.0057146	0.889285	chr4
Ciita	Ciita	128.721	1.70083	0.460956	3.68978	0.000224446	0.182005	chr10
Clec12a	Clec12a	77.1766	1.34069	0.611627	2.19201	0.0283787	1	chr4
Clec4a3	Clec4a3	641.374	1.14741	0.417853	2.74597	0.00603324	0.889285	chr4
Coro1a	Coro1a	648.48	1.50955	0.513908	2.9374	0.00330978	0.751545	chr1
Cox8b	Cox8b	57.824	-1.19672	0.607655	-1.9694	0.0489071	1	chr1
Cryab	Cryab	376.943	-1.49731	0.509633	-2.93802	0.00330315	0.751545	chr8
Csrp3	Csrp3	351.595	-1.11096	0.45431	-2.44537	0.0144703	1	chr1
Ctla4	Ctla4	4.62832	2.63253	0.970495	2.71256	0.0066765	0.903486	chr9
Ctsw	Ctsw	24.0207	1.70526	0.560659	3.04152	0.00235389	0.700779	chr1
Cx3cr1	Cx3cr1	35.0572	1.80736	0.829173	2.17972	0.0292785	1	chr8
Cxcl9	Cxcl9	134.043	1.35452	0.581065	2.3311	0.019748	1	chr14
Cxcr3	Cxcr3	17.6542	2.46368	0.65634	3.75367	0.000174267	0.166761	chrX
Cytip	Cytip	103.401	1.16487	0.414583	2.80973	0.00495827	0.885679	chr3
Dapp1	Dapp1	97.9586	1.18116	0.494112	2.39047	0.0168267	1	chr2
Defb52	Defb52	1.54233	5.62175	2.36312	2.37896	0.0173617	1	chr16
Dennd1c	Dennd1c	162.367	1.01866	0.439252	2.31908	0.0203905	1	chr9
Dhx58	Dhx58	100.376	1.10758	0.446699	2.47948	0.0131573	1	chr10
Disc1	Disc1	10.4904	1.20927	0.613219	1.97201	0.0486085	1	chr19
Dok6	Dok6	17.4827	3.80737	1.46663	2.596	0.0094317	1	chr18
Efcc1	Efcc1	4.36566	2.39591	0.931618	2.57177	0.010118	1	chr4
Efhb	Efhb	1.41307	4.03569	1.91289	2.10974	0.0348809	1	chr9
Epsti1	Epsti1	78.0294	1.87638	0.515367	3.64085	0.000271735	0.202246	chr15
Evi2b	Evi2b	92.0186	1.15636	0.538028	2.14925	0.0316143	1	chr10
Fabp3	Fabp3	88.4885	-1.02644	0.430601	-2.38375	0.0171374	1	chr5
Fam26f	Fam26f	11.3205	1.82484	0.685611	2.66163	0.00777623	0.987717	chr20
Fcar	Fcar	65.7854	3.9712	1.67637	2.36893	0.0178397	1	chr1
Fcgr3a	Fcgr3a	50.2738	2.54341	0.619883	4.10305	4.07733e-05	0.091343	chr13
Fcnb	Fcnb	131.334	2.42884	0.88556	2.74272	0.00609335	0.889285	chr3
Fcrl2	Fcrl2	148.171	1.29048	0.431172	2.99295	0.00276291	0.725777	chr2
Fcrla	Fcrla	22.7382	1.80021	0.63063	2.85462	0.00430885	0.801745	chr13
Fgd2	Fgd2	209.343	1.1771	0.365708	3.21868	0.0012878	0.568118	chr20
Flt3	Flt3	55.028	1.73602	0.568538	3.05348	0.00226205	0.700779	chr12
Foxp2	Foxp2	41.1381	1.12371	0.515264	2.18084	0.0291954	1	chr4
Fyb	Fyb	117.701	1.61671	0.519136	3.11424	0.00184421	0.621392	chr2
Gapt	Gapt	17.5205	2.18347	0.682477	3.19933	0.00137746	0.568118	chr2
Gbp4	Gbp4	34.2203	1.48517	0.700133	2.12126	0.0338999	1	chr2
Gdf6	Gdf6	5.9925	1.97433	0.912106	2.16458	0.0304196	1	chr5
Gpr132	Gpr132	43.5915	1.18175	0.413023	2.86122	0.00422015	0.801745	chr6
Gpr171	Gpr171	44.8547	1.24244	0.534742	2.32344	0.0201556	1	chr2
Gpr174	Gpr174	6.61225	3.37117	0.94003	3.58623	0.00033549	0.224728	chrX
Gpr18	Gpr18	7.80662	1.91146	0.846458	2.25818	0.0239343	1	chr15
Gpr31	Gpr31	2.21828	5.26235	1.61477	3.2589	0.00111847	0.535147	chr1
Gpr35	Gpr35	10.1102	3.59562	0.969767	3.70771	0.000209141	0.182005	chr9
Gpr65	Gpr65	22.7875	1.88684	0.628896	3.00024	0.00269764	0.722805	chr6
Grap2	Grap2	12.3014	2.05766	0.680504	3.02373	0.00249676	0.711682	chr7
Gzmk	Gzmk	8.39603	1.86939	0.74279	2.51671	0.0118457	1	chr2
Gzmm	Gzmm	17.0578	2.7137	0.755738	3.59079	0.000329675	0.224728	chr7
Haao	Haao	2.2663	1.93918	0.974792	1.98933	0.0466652	1	chr6
Havcr1	Havcr1	7.11663	1.92478	0.967379	1.98969	0.0466255	1	chr10
Havcr2	Havcr2	42.3911	1.84001	0.788777	2.33273	0.0196621	1	chr10
Hbe1	Hbe1	1.62613	4.29178	1.71427	2.50357	0.0122947	1	chr1
Hist1h2an	Hist1h2an	12.9438	1.53242	0.760993	2.01371	0.0440398	1	chr17
Hmha1	Hmha1	658.956	1.04092	0.473025	2.20057	0.0277667	1	chr7
Hs3st3a1	Hs3st3a1	3.29814	2.68744	1.16124	2.31428	0.0206523	1	chr10
Hsh2d	Hsh2d	26.5752	1.94438	0.730472	2.66181	0.00777213	0.987717	chr16
Icam5	Icam5	14.5632	1.33472	0.509026	2.6221	0.008739	1	chr8
Ifi27l2b	Ifi27l2b	455.099	1.37891	0.480986	2.86684	0.00414598	0.801745	chr6
Ifi47	Ifi47	323.006	1.21854	0.41005	2.97169	0.00296164	0.748624	chr10
Ikzf2	Ikzf2	21.6255	1.64861	0.594723	2.77206	0.0055702	0.889285	chr9
Ikzf3	Ikzf3	7.36812	1.82077	0.771497	2.36005	0.0182723	1	chr10
Il21r	Il21r	85.8813	1.59999	0.576717	2.77431	0.00553187	0.889285	chr1
Il2ra	Il2ra	8.70165	2.59092	0.728556	3.55624	0.000376195	0.229085	chr17
Il2rb	Il2rb	29.049	2.10265	0.525016	4.00492	6.20383e-05	0.091343	chr7
Ipcef1	Ipcef1	4.73869	2.16063	1.05802	2.04215	0.0411363	1	chr1
Irf7	Irf7	561.036	1.95345	0.785325	2.48744	0.0128665	1	chr1
Irf8	Irf8	255.093	1.8464	0.466282	3.95984	7.49999e-05	0.091343	chr19
Irg1	Irg1	65.8694	3.02275	1.42641	2.11913	0.0340795	1	chr15
Itga4	Itga4	58.774	1.00419	0.434737	2.30989	0.0208945	1	chr3
Itgad	Itgad	18.088	1.55352	0.692525	2.24326	0.0248798	1	chr1
Itgal	Itgal	257.874	1.27721	0.463552	2.75526	0.00586461	0.889285	chr1
Itgb3	Itgb3	116.785	1.33823	0.515972	2.59361	0.0094974	1	chr10
Itgb7	Itgb7	156.016	1.17575	0.5461	2.15298	0.03132	1	chr7
Jakmip1	Jakmip1	4.4285	3.00877	1.1496	2.61724	0.00886452	1	chr14
Kcnn2	Kcnn2	6.06592	-3.01118	1.46166	-2.06011	0.0393877	1	chr18
Klhl41	Klhl41	661.369	-1.07825	0.473657	-2.27643	0.0228204	1	chr3
Klhl6	Klhl6	72.4	1.0425	0.460038	2.26613	0.0234436	1	chr11
Klra1	Klra1	58.3965	1.882	0.686447	2.74166	0.00611292	0.889285	chr4
Klrb1c	Klrb1c	4.57124	3.40802	1.009	3.37762	0.000731156	0.376742	chr4
Klrc1	Klrc1	1.63792	3.35823	1.59185	2.10963	0.0348898	1	chr4
Klrc3	Klrc3	5.85605	2.62887	1.31534	1.99861	0.0456501	1	chr4
Klrd1	Klrd1	10.7663	1.46264	0.662521	2.20768	0.0272663	1	chr4
Klri1	Klri1	9.06102	2.45748	0.789559	3.11247	0.00185532	0.621392	chr4
Klrk1	Klrk1	58.5378	2.52483	0.616126	4.09792	4.16885e-05	0.091343	chr4
Kmo	Kmo	24.1291	1.87703	0.670381	2.79994	0.0051112	0.889283	chr13
Kynu	Kynu	8.62923	1.96152	0.771228	2.54338	0.0109787	1	chr3
Lag3	Lag3	14.5	1.30643	0.583169	2.24022	0.0250769	1	chr4
Lck	Lck	70.1853	1.25697	0.439933	2.85719	0.00427414	0.801745	chr5
Lilrc2	Lilrc2	45.3077	2.88044	1.17845	2.44426	0.014515	1	chr1
LOC100910973	LOC100910973	730.926	1.18863	0.447528	2.65598	0.00790772	0.99009	chr1
LOC24906	LOC24906	107.452	1.57201	0.528609	2.97385	0.00294086	0.748624	chr10
LOC681325	LOC681325	32.7851	1.37964	0.644096	2.14198	0.0321952	1	chrX
LOC691141	LOC691141	184.751	1.31174	0.489702	2.67865	0.00739198	0.970885	chr8
Ly49s6	Ly49s6	3.31563	3.79753	1.50919	2.51627	0.0118605	1	chr4
Ly49s7	Ly49s7	8.84044	1.80672	0.683496	2.64335	0.00820892	1	chr4
Ly86	Ly86	76.8726	1.12054	0.449543	2.49263	0.0126802	1	chr17
Ly9	Ly9	5.49615	2.68701	0.918608	2.92509	0.00344359	0.753601	chr13
MGC105567	MGC105567	34.5536	1.37554	0.53708	2.56114	0.0104328	1	chr18
MGC108823	MGC108823	47.0824	1.26483	0.591083	2.13985	0.0323665	1	chr18
Mmp16	Mmp16	230.484	1.09191	0.542753	2.0118	0.0442414	1	chr5
Mpeg1	Mpeg1	2433.55	1.08489	0.440159	2.46478	0.0137099	1	chr1
Ms4a14	Ms4a14	13.9511	1.36831	0.654559	2.09043	0.0365793	1	chr1
Ms4a4c	Ms4a4c	3.97965	3.11834	1.02413	3.04486	0.00232786	0.700779	chr1
Ms4a7	Ms4a7	98.2148	1.48665	0.570796	2.60452	0.00920029	1	chr1
Mustn1	Mustn1	531.53	-1.07603	0.367938	-2.9245	0.00345013	0.753601	chr16
Myf6	Myf6	63.7289	-1.3185	0.624109	-2.11261	0.0346339	1	chr7
Myo1g	Myo1g	271.704	1.40379	0.501262	2.80052	0.00510209	0.889283	chr14
Myod1	Myod1	31.5754	-1.65989	0.7193	-2.30764	0.0210191	1	chr1
Myog	Myog	104.987	-1.09324	0.526719	-2.07556	0.0379346	1	chr13
Mzb1	Mzb1	6.08464	1.74894	0.829693	2.10794	0.0350365	1	chr18
N5	N5	5.5658	2.25273	0.998134	2.25694	0.0240116	1	chr4
Ncf1	Ncf1	695.094	1.10358	0.522479	2.1122	0.0346692	1	chr12
Ncf4	Ncf4	540.938	1.06472	0.457677	2.32635	0.02	1	chr7
Neurl1b	Neurl1b	19.8129	1.16989	0.428191	2.73217	0.00629177	0.889285	chr10
Nkg7	Nkg7	15.0948	2.04398	0.593932	3.44143	0.000578641	0.310082	chr1
Nlrc4	Nlrc4	80.4913	1.2277	0.472507	2.59827	0.00936935	1	chr6
Nr4a3	Nr4a3	72.0531	1.18293	0.560326	2.11115	0.0347593	1	chr5
Ntf3	Ntf3	117.68	-1.01064	0.481644	-2.09831	0.0358776	1	chr4
Oas2	Oas2	21.7595	1.61218	0.675949	2.38506	0.0170763	1	chr12
Oas3	Oas3	13.4096	1.87923	0.757623	2.48043	0.0131225	1	chr12
Oasl	Oasl	150.621	1.25818	0.631204	1.99331	0.0462277	1	chr12
P2ry10	P2ry10	26.4308	1.83654	0.678328	2.70745	0.00678016	0.908338	chrX
P2ry12	P2ry12	32.9033	1.5224	0.475956	3.19862	0.00138085	0.568118	chr2
P2ry13	P2ry13	36.6256	1.50202	0.639234	2.34972	0.0187876	1	chr2
P2ry14	P2ry14	27.2997	1.08418	0.54887	1.97529	0.0482357	1	chr2
P2ry6	P2ry6	146.79	1.19607	0.488542	2.44824	0.0143554	1	chr1
Pabpc4l	Pabpc4l	1.76731	2.95066	1.37918	2.13944	0.0324	1	chr2
Padi2	Padi2	45.7357	-1.35564	0.571481	-2.37215	0.0176848	1	chr5
Parvg	Parvg	109.512	1.31257	0.627581	2.09147	0.0364857	1	chr7
Phf11	Phf11	75.076	1.58772	0.53898	2.94579	0.00322134	0.751545	chr15
Phf11b	Phf11b	6.65405	2.13852	0.880694	2.42822	0.0151731	1	chr15
Plac8	Plac8	551.332	1.02222	0.472252	2.16457	0.030421	1	chr14
Pld4	Pld4	289.684	1.34852	0.423264	3.18601	0.0014425	0.568118	chr6
Plekhd1	Plekhd1	8.46066	-2.17437	0.791898	-2.74577	0.00603682	0.889285	chr6
Pou2f2	Pou2f2	140.497	1.96079	0.624716	3.13869	0.00169702	0.59829	chr1
Prex1	Prex1	355.176	1.07335	0.425796	2.5208	0.011709	1	chr3
Prf1	Prf1	12.2087	1.51666	0.57577	2.63415	0.00843488	1	chr20
Prkcb	Prkcb	60.5448	1.10729	0.466229	2.37499	0.0175494	1	chr1
Psmb9	Psmb9	229.586	1.02074	0.510954	1.99772	0.0457472	1	chr20
Ptgdr2	Ptgdr2	3.24455	4.06075	1.3525	3.0024	0.00267859	0.722805	chr1
Ptpn22	Ptpn22	26.12	1.61146	0.618681	2.60468	0.00919609	1	chr2
Ptprc	Ptprc	1083.42	1.37452	0.503861	2.72798	0.00637242	0.889285	chr13
Ptprcap	Ptprcap	33.8613	1.84354	0.579726	3.18001	0.0014727	0.568118	chr1
Rab43	Rab43	70.7646	1.045	0.362619	2.88181	0.003954	0.801745	chr4
Rarres1	Rarres1	442.784	1.00495	0.351598	2.85825	0.00425988	0.801745	chr2
RGD1359449	RGD1359449	2.57031	2.63791	1.25134	2.10806	0.0350257	1	chr7
Rgs14	Rgs14	116.036	1.08607	0.478786	2.26839	0.0233057	1	chr17
Rgs17	Rgs17	1.06549	-3.89513	1.84911	-2.10648	0.0351625	1	chr1
Rhoh	Rhoh	41.5938	1.08294	0.516608	2.09624	0.0360606	1	chr14
Rnase6	Rnase6	10.2187	1.98911	0.700409	2.83992	0.00451244	0.828125	chr15
Rnase6	Rnase6	10.2187	1.98911	0.700409	2.83992	0.00451244	0.828125	chrUn_KL568405v1
RT1-Ba	RT1-Ba	1137.11	1.50243	0.367898	4.08383	4.42997e-05	0.091343	chr20
RT1-CE4	RT1-CE4	233.815	1.20408	0.476089	2.52911	0.0114352	1	chr20
RT1-Da	RT1-Da	2053.04	1.56053	0.386826	4.0342	5.47887e-05	0.091343	chr20
RT1-Db1	RT1-Db1	1459.81	1.43952	0.331153	4.34698	1.38025e-05	0.0661918	chr20
RT1-DOa	RT1-DOa	23.3778	1.75153	0.552608	3.16957	0.00152663	0.568118	chr20
RT1-DOb	RT1-DOb	25.1764	1.59842	0.584798	2.73329	0.00627055	0.889285	chr20
RT1-S3	RT1-S3	627.985	1.11666	0.424822	2.62854	0.00857533	1	chr20
Runx3	Runx3	44.1895	1.38194	0.583932	2.36661	0.0179517	1	chr5
S1pr4	S1pr4	30.6488	1.34669	0.613982	2.19336	0.0282812	1	chr7
Samhd1	Samhd1	136.938	1.30156	0.646618	2.01287	0.0441279	1	chr3
Samsn1	Samsn1	343.204	1.13899	0.513643	2.21748	0.0265904	1	chr11
Sash3	Sash3	118.381	1.16958	0.487907	2.39714	0.0165236	1	chrX
Sec1	Sec1	20.784	-1.38057	0.668569	-2.06496	0.0389265	1	chr1
Sell	Sell	160.637	2.03342	0.928764	2.18938	0.0285691	1	chr13
Selplg	Selplg	224.53	1.27338	0.558781	2.27886	0.0226755	1	chr12
Sema4f	Sema4f	30.0252	1.88867	0.622453	3.03424	0.00241142	0.7023	chr4
Sh2d2a	Sh2d2a	15.2391	1.59085	0.687537	2.31384	0.0206765	1	chr2
Siglec1	Siglec1	251.638	1.43205	0.38888	3.6825	0.000230954	0.182005	chr3
Sit1	Sit1	7.34497	1.70822	0.837797	2.03894	0.0414557	1	chr5
Sla	Sla	132.771	1.14937	0.563349	2.04024	0.0413264	1	chr7
Sla2	Sla2	6.1871	2.46686	0.833497	2.95965	0.00307993	0.751545	chr3
Slamf7	Slamf7	11.1685	2.41114	0.799397	3.0162	0.00255962	0.714399	chr13
Slamf9	Slamf9	200.219	1.57129	0.563455	2.78866	0.00529259	0.889285	chr13
Slc16a5	Slc16a5	1.91408	3.53435	1.70669	2.07088	0.0383696	1	chr10
Slc51a	Slc51a	19.9639	-1.94781	0.760903	-2.55986	0.0104714	1	chr11
Slfn3	Slfn3	6650.34	1.81085	0.729082	2.48374	0.0130009	1	chr10
Snx20	Snx20	83.0772	1.1714	0.501678	2.33496	0.0195455	1	chr19
Socs1	Socs1	45.5145	1.05111	0.536072	1.96077	0.0499064	1	chr10
Sohlh2	Sohlh2	11.8068	-2.32024	0.731197	-3.1732	0.00150767	0.568118	chr2
Spaca5	Spaca5	3.95471	2.15758	1.03195	2.09078	0.0365476	1	chrX
Spib	Spib	26.943	2.69517	0.667993	4.03473	5.46648e-05	0.091343	chr1
Spn	Spn	101.622	1.54488	0.580792	2.65996	0.00781504	0.987717	chr1
Tac4	Tac4	19.0216	-1.19375	0.598429	-1.99481	0.0460632	1	chr10
Tagap	Tagap	116.421	1.74382	0.633697	2.75182	0.00592659	0.889285	chr1
Tbc1d10c	Tbc1d10c	50.2209	1.28202	0.58923	2.17576	0.0295735	1	chr1
Tbx21	Tbx21	11.0952	2.10195	0.485292	4.33131	1.48224e-05	0.0661918	chr10
Tceal7	Tceal7	144.802	-1.10149	0.509102	-2.16359	0.0304958	1	chrX
Tifab	Tifab	74.9787	1.37089	0.551224	2.48699	0.012883	1	chr17
Tlr1	Tlr1	63.8457	1.87839	0.647898	2.8992	0.00374117	0.783133	chr14
Tlr10	Tlr10	13.266	2.12208	0.937617	2.26327	0.0236189	1	chr14
Tlr12	Tlr12	10.3664	1.97183	0.894859	2.2035	0.0275592	1	chr5
Tlr5	Tlr5	74.3458	1.275	0.539172	2.36474	0.0180427	1	chr13
Tmem150b	Tmem150b	66.3786	1.10451	0.428242	2.57918	0.00990353	1	chr1
Tmem156	Tmem156	31.893	1.68576	0.754123	2.23539	0.0253917	1	chr14
Tmem26	Tmem26	44.8077	1.14381	0.501217	2.28207	0.0224854	1	chr20
Tmem8c	Tmem8c	54.9099	-1.08592	0.426007	-2.54907	0.0108012	1	chr3
Tnfrsf14	Tnfrsf14	42.1996	2.50388	0.644476	3.88514	0.00010227	0.114175	chr5
Traf3ip3	Traf3ip3	31.3099	1.16715	0.428948	2.72096	0.00650928	0.899019	chr13
Trpm2	Trpm2	141.815	1.89093	0.584398	3.2357	0.00121347	0.560579	chr20
Txk	Txk	7.27599	1.88568	0.659772	2.85809	0.00426206	0.801745	chr14
Uba7	Uba7	84.5231	1.05747	0.502815	2.10309	0.0354579	1	chr8
Ube2d4	Ube2d4	27.0727	2.7906	1.39432	2.0014	0.0453491	1	chr14
Xcl1	Xcl1	3.80008	2.44299	0.987399	2.47417	0.0133545	1	chr13
Xcr1	Xcr1	19.7551	2.01777	0.82699	2.4399	0.0146915	1	chr8
Zap70	Zap70	23.3525	2.48605	0.626765	3.96648	7.29434e-05	0.091343	chr9
Zbp1	Zbp1	36.472	1.98212	0.785235	2.52423	0.0115951	1	chr3
Zc3h12d	Zc3h12d	113.07	1.10049	0.443827	2.47956	0.0131546	1	chr1
Zfp36l2	Zfp36l2	34.7397	1.00707	0.486209	2.07126	0.0383342	1	chr6
Zfp36l2	Zfp36l2	34.7397	1.00707	0.486209	2.07126	0.0383342	1	chr7
