# Supplementary material for: Transplantation of Wharton's jelly mesenchymal stem cells encapsulated with Hydroactive® Gel promotes diabetic wound antifibrotic healing in type 2 diabetic rats
Source: Royal Society of Chemistry journal article supplement (doi:10.1039/d2tb01649d), 2022-01-01
Supplement: d2tb01649d7.xlsx [file d2tb01649d7.xlsx]

## Sheet: The DEGs in D3MSC vs. D3CON
ID	Description	GeneRatio	BgRatio	pvalue	p.adjust	qvalue	geneID	Count	type
GO:0030545	signaling receptor regulator activity	47/442	494/16532	3.57159e-14	2.90727e-11	2.49635e-11	Areg/Bmp6/Ccl11/Ccl12/Ccl24/Ccl3/Ccl4/Ccl7/Clcf1/Crhr2/Cxcl14/Cxcl2/Cxcl3/Defb14/Efemp1/Ereg/Fgf11/Fgf23/Fst/Grem1/Grem2/Il10/Il11/Il17b/Il1a/Il1rn/Il23a/Il36rn/Lif/Ly6g6d/Lynx1/Lypd6b/Nampt/Ngf/Nrg1/Nrg2/Ntf4/Pdgfc/Pgf/Pthlh/Sectm1b/Sema3e/Sema4d/Thbs4/Tshb/Wnt5b/Wnt6	47	MF
GO:0048018	receptor ligand activity	43/442	451/16532	4.38713e-13	1.78556e-10	1.53319e-10	Areg/Bmp6/Ccl11/Ccl12/Ccl24/Ccl3/Ccl4/Ccl7/Clcf1/Crhr2/Cxcl14/Cxcl2/Cxcl3/Defb14/Efemp1/Ereg/Fgf11/Fgf23/Grem1/Grem2/Il10/Il11/Il17b/Il1a/Il1rn/Il23a/Il36rn/Lif/Nampt/Ngf/Nrg1/Nrg2/Ntf4/Pdgfc/Pgf/Pthlh/Sectm1b/Sema3e/Sema4d/Thbs4/Tshb/Wnt5b/Wnt6	43	MF
GO:0030546	signaling receptor activator activity	43/442	460/16532	8.59179e-13	2.33124e-10	2.00174e-10	Areg/Bmp6/Ccl11/Ccl12/Ccl24/Ccl3/Ccl4/Ccl7/Clcf1/Crhr2/Cxcl14/Cxcl2/Cxcl3/Defb14/Efemp1/Ereg/Fgf11/Fgf23/Grem1/Grem2/Il10/Il11/Il17b/Il1a/Il1rn/Il23a/Il36rn/Lif/Nampt/Ngf/Nrg1/Nrg2/Ntf4/Pdgfc/Pgf/Pthlh/Sectm1b/Sema3e/Sema4d/Thbs4/Tshb/Wnt5b/Wnt6	43	MF
GO:0005125	cytokine activity	26/442	189/16532	6.99485e-12	1.42345e-09	1.22226e-09	Areg/Bmp6/Ccl11/Ccl12/Ccl24/Ccl3/Ccl4/Ccl7/Clcf1/Cxcl14/Cxcl2/Cxcl3/Grem1/Grem2/Il10/Il11/Il17b/Il1a/Il1rn/Il23a/Il36rn/Lif/Nampt/Sectm1b/Wnt5b/Wnt6	26	MF
GO:0005126	cytokine receptor binding	27/442	281/16532	9.8098e-09	1.59704e-06	1.37131e-06	Ccl11/Ccl12/Ccl24/Ccl3/Ccl4/Ccl7/Clcf1/Cx3cr1/Cxcl14/Cxcl2/Cxcl3/Defb14/Ebi3/Grem1/Il10/Il11/Il1a/Il1rap/Il1rn/Il23a/Il36rn/Lif/Ngf/Ngfr/Ntf4/Pgf/Tlr9	27	MF
GO:0019955	cytokine binding	17/442	141/16532	2.26802e-07	3.07695e-05	2.64205e-05	Ccr1/Ccr1l1/Cx3cr1/Cxcr2/Ebi3/Elane/Grem1/Grem2/Il1r2/Il1rap/Il1rl1/Il1rn/Il36rn/Ltbp1/Sostdc1/Thbs1/Tnfrsf1b	17	MF
GO:0008009	chemokine activity	9/442	37/16532	4.11712e-07	4.6548e-05	3.99688e-05	Ccl11/Ccl12/Ccl24/Ccl3/Ccl4/Ccl7/Cxcl14/Cxcl2/Cxcl3	9	MF
GO:0070851	growth factor receptor binding	17/442	148/16532	4.57474e-07	4.6548e-05	3.99688e-05	Areg/Efemp1/Ereg/Ern1/Fgf23/Grem1/Il10/Il11/Il1a/Il1rap/Il1rn/Il36rn/Nrg2/Pdgfc/Pgf/Plscr1/Tlr9	17	MF
GO:0042379	chemokine receptor binding	11/442	68/16532	1.71227e-06	0.000154866	0.000132977	Ccl11/Ccl12/Ccl24/Ccl3/Ccl4/Ccl7/Cx3cr1/Cxcl14/Cxcl2/Cxcl3/Defb14	11	MF
GO:0005539	glycosaminoglycan binding	19/442	216/16532	5.75431e-06	0.000468401	0.000402196	Adamts1/Adamts15/Ccl3/Ccl7/Col13a1/Elane/Grem2/Itgam/Lipg/Lrtm2/Ltbp2/Lyve1/Pglyrp1/Selp/Shh/Slit3/Thbs1/Thbs4/Tnfaip6	19	MF
GO:0008083	growth factor activity	15/442	145/16532	7.99931e-06	0.000591949	0.000508281	Areg/Bmp6/Efemp1/Ereg/Fgf11/Fgf23/Il11/Lif/Ngf/Nrg1/Nrg2/Ntf4/Pdgfc/Pgf/Thbs4	15	MF
GO:0008201	heparin binding	15/442	160/16532	2.61454e-05	0.00177353	0.00152286	Adamts1/Adamts15/Ccl3/Ccl7/Col13a1/Elane/Grem2/Itgam/Lipg/Lrtm2/Ltbp2/Selp/Slit3/Thbs1/Thbs4	15	MF
GO:0019966	interleukin-1 binding	4/442	8/16532	3.24008e-05	0.00202879	0.00174203	Il1r2/Il1rap/Il1rn/Il36rn	4	MF
GO:0005149	interleukin-1 receptor binding	5/442	16/16532	4.57143e-05	0.00265796	0.00228228	Il1a/Il1rap/Il1rn/Il36rn/Tlr9	5	MF
GO:0001653	peptide receptor activity	14/442	156/16532	7.79364e-05	0.00422935	0.00363156	Ccr1/Ccr1l1/Crhr2/Cx3cr1/Cxcr2/F2rl2/Fpr1/Gpr37l1/Gucy2c/Kiss1r/Ltb4r/Mrgprx3/Prokr2/Ramp3	14	MF
GO:0031406	carboxylic acid binding	15/442	177/16532	8.41322e-05	0.00428023	0.00367525	Crabp1/Egln3/Gstm7/Mag/Nos2/P4ha1/Padi4/Pmp2/Ppard/Pygl/Sele/Selp/Sesn2/Slc1a1/Snca	15	MF
GO:1901681	sulfur compound binding	19/442	265/16532	9.83806e-05	0.00471069	0.00404487	Adamts1/Adamts15/Ccl3/Ccl7/Col13a1/Elane/Fst/Grem2/Gstm7/Itgam/Lipg/Lrtm2/Ltbp2/Selp/Slc6a6/Slit3/Soat1/Thbs1/Thbs4	19	MF
GO:0008528	G protein-coupled peptide receptor activity	13/442	147/16532	0.000161641	0.00730975	0.00627657	Ccr1/Ccr1l1/Crhr2/Cx3cr1/Cxcr2/F2rl2/Fpr1/Gpr37l1/Kiss1r/Ltb4r/Mrgprx3/Prokr2/Ramp3	13	MF
GO:0031726	CCR1 chemokine receptor binding	3/442	5/16532	0.000182369	0.00781307	0.00670876	Ccl3/Ccl4/Ccl7	3	MF
GO:0001664	G protein-coupled receptor binding	20/442	308/16532	0.000247231	0.0100623	0.00864007	Adora2a/Adra2a/Arrdc3/Ccl11/Ccl12/Ccl24/Ccl3/Ccl4/Ccl7/Cx3cr1/Cxcl14/Cxcl2/Cxcl3/Defb14/Fpr1/Gna13/Gnat1/Ramp3/Wnt5b/Wnt6	20	MF
GO:0048020	CCR chemokine receptor binding	7/442	49/16532	0.000303015	0.0117454	0.0100853	Ccl11/Ccl12/Ccl24/Ccl3/Ccl4/Ccl7/Defb14	7	MF
GO:0008509	anion transmembrane transporter activity	19/442	292/16532	0.000342052	0.0126521	0.0108638	Ano4/Clca4l/Clcnkb/Cldn4/Gabrd/Gabrr1/Sfxn2/Slc16a11/Slc16a3/Slc1a1/Slc26a9/Slc2a1/Slc32a1/Slc47a1/Slc6a13/Slc6a4/Slc6a6/Slc7a2/Ttyh1	19	MF
GO:0004908	interleukin-1 receptor activity	3/442	6/16532	0.000357492	0.0126521	0.0108638	Il1r2/Il1rap/Il1rl1	3	MF
GO:0015267	channel activity	26/442	470/16532	0.000398772	0.012984	0.0111488	Abcc8/Ano4/Aqp9/Clca4l/Clcnkb/Cldn4/Fxyd4/Gabrd/Gabrr1/Gja3/Gjb1/Gjb5/Gjb6/Kcna3/Kcnd3/Kcnj12/Kcnj15/Kcnj2/Kcnma1/Mcoln2/Scn7a/Slc1a1/Slc26a9/Tmc4/Tmem38b/Ttyh1	26	MF
GO:0022803	passive transmembrane transporter activity	26/442	470/16532	0.000398772	0.012984	0.0111488	Abcc8/Ano4/Aqp9/Clca4l/Clcnkb/Cldn4/Fxyd4/Gabrd/Gabrr1/Gja3/Gjb1/Gjb5/Gjb6/Kcna3/Kcnd3/Kcnj12/Kcnj15/Kcnj2/Kcnma1/Mcoln2/Scn7a/Slc1a1/Slc26a9/Tmc4/Tmem38b/Ttyh1	26	MF
GO:0005253	anion channel activity	9/442	85/16532	0.000438978	0.0137434	0.0118009	Ano4/Clca4l/Clcnkb/Cldn4/Gabrd/Gabrr1/Slc1a1/Slc26a9/Ttyh1	9	MF
GO:0015185	gamma-aminobutyric acid transmembrane transporter activity	3/442	7/16532	0.000613198	0.0184868	0.0158738	Slc32a1/Slc6a13/Slc6a6	3	MF
GO:0030246	carbohydrate binding	17/442	260/16532	0.000655081	0.0190441	0.0163524	Asgr2/Clec10a/Clec4d/Egln3/Endou/Galnt3/Hk2/Lgals7/Mag/Nptx2/Olr1/P4ha1/Ppp1r3b/Ppp1r3d/Pygl/Sele/Selp	17	MF
GO:0005254	chloride channel activity	8/442	73/16532	0.000719968	0.0202087	0.0173524	Ano4/Clca4l/Clcnkb/Cldn4/Gabrd/Gabrr1/Slc26a9/Ttyh1	8	MF
GO:0016755	aminoacyltransferase activity	4/442	17/16532	0.000909636	0.0237213	0.0203685	F13a1/Ggt1/Tgm1/Tgm3	4	MF
GO:0030547	signaling receptor inhibitor activity	5/442	29/16532	0.000933176	0.0237213	0.0203685	Fst/Il1rn/Il36rn/Ly6g6d/Lynx1	5	MF
GO:0003810	protein-glutamine gamma-glutamyltransferase activity	3/442	8/16532	0.000961676	0.0237213	0.0203685	F13a1/Tgm1/Tgm3	3	MF
GO:1903136	cuprous ion binding	3/442	8/16532	0.000961676	0.0237213	0.0203685	Atp7a/Snca/Sncb	3	MF
GO:0003953	NAD+ nucleosidase activity	5/442	30/16532	0.00109551	0.0262278	0.0225207	Art2b/Il1rap/Il1rl1/Pik3ap1/Tlr9	5	MF
GO:0019911	structural constituent of myelin sheath	3/442	9/16532	0.00141397	0.0321076	0.0275694	Mal/Ncmap/Plp1	3	MF
GO:0030296	protein tyrosine kinase activator activity	4/442	19/16532	0.00141999	0.0321076	0.0275694	Grem1/Ngf/Nrg1/Pak2	4	MF
GO:0015171	amino acid transmembrane transporter activity	8/442	83/16532	0.00167617	0.0368758	0.0316637	Sfxn2/Slc1a1/Slc22a4/Slc32a1/Slc47a1/Slc6a13/Slc6a6/Slc7a2	8	MF
GO:0005154	epidermal growth factor receptor binding	5/442	35/16532	0.0022368	0.0479147	0.0411423	Areg/Efemp1/Ereg/Nrg2/Plscr1	5	MF
GO:0045121	membrane raft	32/471	408/18211	2.75426e-08	6.05373e-06	5.42033e-06	Add2/Arid3a/Atp2b2/Atp7a/Birc3/Eno2/Fcgr2b/Gja3/Has2/Itgam/Kcna3/Kcnd3/Kcnma1/Kras/Ltb4r/Mag/Mal/Ngfr/Olr1/Pag1/Plscr1/Prss8/Ptgis/Ptgs2/Ret/Sele/Shh/Slc1a1/Slc2a1/Slc2a4/Slc6a4/Tnfrsf1b	32	CC
GO:0098857	membrane microdomain	32/471	409/18211	2.91746e-08	6.05373e-06	5.42033e-06	Add2/Arid3a/Atp2b2/Atp7a/Birc3/Eno2/Fcgr2b/Gja3/Has2/Itgam/Kcna3/Kcnd3/Kcnma1/Kras/Ltb4r/Mag/Mal/Ngfr/Olr1/Pag1/Plscr1/Prss8/Ptgis/Ptgs2/Ret/Sele/Shh/Slc1a1/Slc2a1/Slc2a4/Slc6a4/Tnfrsf1b	32	CC
GO:0005882	intermediate filament	16/471	144/18211	1.02588e-06	0.000141914	0.000127065	Adora2a/Cldn11/Gfap/Kb23/Krt17/Krt25/Krt27/Krt31/Krt35/Krt71/Krt73/Krt83/Krt85/Krtap15-1/Narf/Prph	16	CC
GO:0045111	intermediate filament cytoskeleton	16/471	185/18211	2.61172e-05	0.00270966	0.00242615	Adora2a/Cldn11/Gfap/Kb23/Krt17/Krt25/Krt27/Krt31/Krt35/Krt71/Krt73/Krt83/Krt85/Krtap15-1/Narf/Prph	16	CC
GO:0009897	external side of plasma membrane	24/471	428/18211	0.000345704	0.0286934	0.0256912	Adgre1/Art2b/Ccr1/Ccr1l1/Cd163/Cd274/Cx3cr1/Cxcr2/Dlk1/Ebi3/Fcgr2b/Fcmr/Il1rl1/Itgam/Kcnma1/Ly6g6d/Ngfr/Nrg1/Plet1/Sele/Selp/Slamf9/Slc2a4/Thbs1	24	CC
GO:0016324	apical plasma membrane	22/471	395/18211	0.000659841	0.045639	0.0408638	Ajap1/Atp2b2/Atp7a/Cldn1/Cldn4/F2rl2/Gjb6/Gnat1/Kcnma1/Mal/Nrg1/Plet1/Rapgef6/Slc16a3/Slc1a1/Slc22a4/Slc26a9/Slc2a1/Slc47a1/Slc6a6/Sptbn2/Tlr9	22	CC
GO:0036293	response to decreased oxygen levels	36/460	470/17859	6.00176e-09	1.08299e-05	8.72826e-06	Ak4/Alas1/Aldoc/Alkbh5/Atp7a/Bach1/Bcl2l1/Bnip3/Ddit4/Dio3/Egln3/Ero1a/Fosl2/Foxo3/Hif3a/Hk2/Il1a/Kcnma1/Kdm3a/Mgarp/Nampt/Nos2/Pgf/Pik3cb/Pmaip1/Ppard/Ppp1r15a/Ptgis/Ptgs2/Rest/Serpina1/Shh/Slc1a1/Slc2a1/Slc2a4/Slc6a4	36	BP
GO:0031069	hair follicle morphogenesis	10/460	33/17859	6.34645e-09	1.08299e-05	8.72826e-06	Atp7a/Fst/Krt17/Krt25/Krt27/Krt71/Ngfr/Runx3/Shh/Sostdc1	10	BP
GO:0008544	epidermis development	28/460	308/17859	8.11344e-09	1.08299e-05	8.72826e-06	Atp2b2/Atp7a/Cdh3/Dsg4/Esrp1/Fermt1/Flnb/Fosl2/Fst/Il1a/Kcnma1/Krt17/Krt25/Krt27/Krt71/Maff/Ngfr/Ntf4/Pls1/Pou2f3/Ppard/Prss8/Rest/Runx3/Shh/Sostdc1/Tgm1/Tgm3	28	BP
GO:0043588	skin development	26/460	270/17859	8.52413e-09	1.08299e-05	8.72826e-06	Arrdc3/Atp7a/Cdh3/Cela2a/Cldn1/Cldn4/Dsg4/Fermt1/Flnb/Fmod/Fosl2/Fst/Il1a/Krt17/Krt25/Krt27/Krt71/Ngfr/Pou2f3/Prss8/Runx3/Shh/Sostdc1/Sts/Tgm1/Tgm3	26	BP
GO:0050900	leukocyte migration	31/460	382/17859	1.87748e-08	1.90827e-05	1.53796e-05	Add2/Apod/Ccl11/Ccl12/Ccl24/Ccl3/Ccl4/Ccl7/Ccr1/Ccr1l1/Cx3cr1/Cxcl14/Cxcl2/Cxcl3/Cxcr2/Elane/Grem1/Il1a/Il23a/Itgam/Mcoln2/Nlrp3/Pgf/Rabgef1/Sele/Selp/Slamf9/Thbs1/Thbs4/Trem1/Trem3	31	BP
GO:0001666	response to hypoxia	33/460	436/17859	3.50926e-08	2.75513e-05	2.22047e-05	Ak4/Alas1/Aldoc/Alkbh5/Atp7a/Bach1/Bcl2l1/Bnip3/Ddit4/Dio3/Egln3/Ero1a/Fosl2/Foxo3/Hif3a/Hk2/Il1a/Kcnma1/Kdm3a/Mgarp/Nos2/Pgf/Pik3cb/Pmaip1/Ppard/Ptgis/Ptgs2/Rest/Serpina1/Shh/Slc2a1/Slc2a4/Slc6a4	33	BP
GO:0048730	epidermis morphogenesis	10/460	39/17859	3.79495e-08	2.75513e-05	2.22047e-05	Atp7a/Fst/Krt17/Krt25/Krt27/Krt71/Ngfr/Runx3/Shh/Sostdc1	10	BP
GO:0070098	chemokine-mediated signaling pathway	13/460	74/17859	4.646e-08	2.95137e-05	2.37863e-05	Ccl11/Ccl12/Ccl24/Ccl3/Ccl4/Ccl7/Ccr1/Ccr1l1/Cx3cr1/Cxcl2/Cxcl3/Cxcr2/Slit3	13	BP
GO:0070997	neuron death	33/460	446/17859	6.01675e-08	3.39746e-05	2.73815e-05	Adora2a/Amigo2/Atp7a/Bcl2l1/Bnip3/Ccl3/Clcf1/Cx3cr1/Cxcl2/Ddit3/Ddit4/Dio3/Egln3/Eno2/Fcgr2b/Foxo3/Il10/Itgam/Kcnma1/Kras/Mag/Max/Nampt/Ngf/Ngfr/Ntf4/Pmaip1/Rest/Shh/Slc1a1/Snca/Sncb/Tnfrsf1b	33	BP
GO:0097529	myeloid leukocyte migration	22/460	224/17859	8.51705e-08	4.32837e-05	3.48841e-05	Ccl11/Ccl12/Ccl24/Ccl3/Ccl4/Ccl7/Ccr1/Ccr1l1/Cx3cr1/Cxcl2/Cxcl3/Cxcr2/Grem1/Il1a/Il23a/Itgam/Mcoln2/Pgf/Thbs1/Thbs4/Trem1/Trem3	22	BP
GO:0050727	regulation of inflammatory response	28/460	350/17859	1.25182e-07	4.65431e-05	3.7511e-05	Acp5/Adora2a/Adora2b/Aoah/C1qtnf3/Ccl24/Ccl3/Cma1/Cx3cr1/Fcgr2b/Ggt1/Ier3/Il10/Il1rl1/Mmp8/Nlrp3/Pglyrp1/Pik3ap1/Ppard/Ptgis/Ptgs2/Rabgef1/Slc7a2/Slpi/Snca/Tlr9/Tnfaip6/Tnfrsf1b	28	BP
GO:0030595	leukocyte chemotaxis	22/460	229/17859	1.25916e-07	4.65431e-05	3.7511e-05	Ccl11/Ccl12/Ccl24/Ccl3/Ccl4/Ccl7/Ccr1/Ccr1l1/Cx3cr1/Cxcl14/Cxcl2/Cxcl3/Cxcr2/Grem1/Il23a/Itgam/Pgf/Slamf9/Thbs1/Thbs4/Trem1/Trem3	22	BP
GO:0002687	positive regulation of leukocyte migration	18/460	157/17859	1.26479e-07	4.65431e-05	3.7511e-05	Ccl12/Ccl24/Ccl3/Ccl4/Ccl7/Ccr1/Ccr1l1/Cx3cr1/Cxcl14/Cxcr2/Il1a/Il23a/Pgf/Sele/Selp/Thbs1/Thbs4/Trem1	18	BP
GO:0042303	molting cycle	16/460	125/17859	1.37376e-07	4.65431e-05	3.7511e-05	Atp7a/Cdh3/Dsg4/Fermt1/Fst/Krt17/Krt25/Krt27/Krt71/Krt83/Ngfr/Prss8/Ptgs2/Runx3/Shh/Sostdc1	16	BP
GO:0042633	hair cycle	16/460	125/17859	1.37376e-07	4.65431e-05	3.7511e-05	Atp7a/Cdh3/Dsg4/Fermt1/Fst/Krt17/Krt25/Krt27/Krt71/Krt83/Ngfr/Prss8/Ptgs2/Runx3/Shh/Sostdc1	16	BP
GO:0002685	regulation of leukocyte migration	22/460	233/17859	1.70725e-07	5.13419e-05	4.13785e-05	Apod/Ccl12/Ccl24/Ccl3/Ccl4/Ccl7/Ccr1/Ccr1l1/Cx3cr1/Cxcl14/Cxcr2/Elane/Grem1/Il1a/Il23a/Pgf/Rabgef1/Sele/Selp/Thbs1/Thbs4/Trem1	22	BP
GO:1990266	neutrophil migration	16/460	127/17859	1.71746e-07	5.13419e-05	4.13785e-05	Ccl11/Ccl12/Ccl24/Ccl3/Ccl4/Ccl7/Cxcl2/Cxcl3/Cxcr2/Il1a/Il23a/Itgam/Mcoln2/Thbs4/Trem1/Trem3	16	BP
GO:1990868	response to chemokine	13/460	85/17859	2.53535e-07	6.78139e-05	5.4654e-05	Ccl11/Ccl12/Ccl24/Ccl3/Ccl4/Ccl7/Ccr1/Ccr1l1/Cx3cr1/Cxcl2/Cxcl3/Cxcr2/Slit3	13	BP
GO:1990869	cellular response to chemokine	13/460	85/17859	2.53535e-07	6.78139e-05	5.4654e-05	Ccl11/Ccl12/Ccl24/Ccl3/Ccl4/Ccl7/Ccr1/Ccr1l1/Cx3cr1/Cxcl2/Cxcl3/Cxcr2/Slit3	13	BP
GO:0001942	hair follicle development	14/460	102/17859	3.48924e-07	8.44396e-05	6.80533e-05	Atp7a/Cdh3/Dsg4/Fermt1/Fst/Krt17/Krt25/Krt27/Krt71/Ngfr/Prss8/Runx3/Shh/Sostdc1	14	BP
GO:0030593	neutrophil chemotaxis	14/460	102/17859	3.48924e-07	8.44396e-05	6.80533e-05	Ccl11/Ccl12/Ccl24/Ccl3/Ccl4/Ccl7/Cxcl2/Cxcl3/Cxcr2/Il23a/Itgam/Thbs4/Trem1/Trem3	14	BP
GO:0022404	molting cycle process	14/460	105/17859	5.01829e-07	0.000110882	8.93646e-05	Atp7a/Cdh3/Dsg4/Fermt1/Fst/Krt17/Krt25/Krt27/Krt71/Ngfr/Prss8/Runx3/Shh/Sostdc1	14	BP
GO:0022405	hair cycle process	14/460	105/17859	5.01829e-07	0.000110882	8.93646e-05	Atp7a/Cdh3/Dsg4/Fermt1/Fst/Krt17/Krt25/Krt27/Krt71/Ngfr/Prss8/Runx3/Shh/Sostdc1	14	BP
GO:0060326	cell chemotaxis	25/460	311/17859	5.45663e-07	0.000114732	9.24673e-05	Ccl11/Ccl12/Ccl24/Ccl3/Ccl4/Ccl7/Ccr1/Ccr1l1/Cx3cr1/Cxcl14/Cxcl2/Cxcl3/Cxcr2/Defb14/Grem1/Il23a/Itgam/Pgf/Plxnb3/Shh/Slamf9/Thbs1/Thbs4/Trem1/Trem3	25	BP
GO:0098773	skin epidermis development	14/460	106/17859	5.64792e-07	0.000114732	9.24673e-05	Atp7a/Cdh3/Dsg4/Fermt1/Fst/Krt17/Krt25/Krt27/Krt71/Ngfr/Prss8/Runx3/Shh/Sostdc1	14	BP
GO:0097530	granulocyte migration	17/460	156/17859	5.86981e-07	0.000114732	9.24673e-05	Ccl11/Ccl12/Ccl24/Ccl3/Ccl4/Ccl7/Cxcl2/Cxcl3/Cxcr2/Il1a/Il23a/Itgam/Mcoln2/Thbs1/Thbs4/Trem1/Trem3	17	BP
GO:0015849	organic acid transport	26/460	336/17859	6.7165e-07	0.000126419	0.000101887	Adora2a/Aqp9/Arg1/Gfap/Hnf1a/Il1a/Il1rn/Kiss1r/Pla2g2a/Plin2/Ppard/Sfxn2/Slc16a11/Slc16a3/Slc1a1/Slc22a4/Slc26a9/Slc27a6/Slc2a1/Slc32a1/Slc47a1/Slc6a13/Slc6a6/Slc7a2/Snca/Thbs1	26	BP
GO:0051402	neuron apoptotic process	25/460	319/17859	8.73297e-07	0.000154537	0.000124547	Adora2a/Amigo2/Atp7a/Bcl2l1/Bnip3/Ccl3/Clcf1/Cx3cr1/Ddit3/Dio3/Egln3/Foxo3/Il10/Itgam/Kcnma1/Kras/Mag/Max/Ngf/Ngfr/Ntf4/Pmaip1/Slc1a1/Snca/Sncb	25	BP
GO:0050728	negative regulation of inflammatory response	16/460	143/17859	8.81849e-07	0.000154537	0.000124547	Acp5/Adora2a/Aoah/C1qtnf3/Cx3cr1/Fcgr2b/Ier3/Il10/Nlrp3/Pglyrp1/Ppard/Ptgis/Rabgef1/Slpi/Tnfaip6/Tnfrsf1b	16	BP
GO:0071621	granulocyte chemotaxis	15/460	127/17859	9.67121e-07	0.000160305	0.000129196	Ccl11/Ccl12/Ccl24/Ccl3/Ccl4/Ccl7/Cxcl2/Cxcl3/Cxcr2/Il23a/Itgam/Thbs1/Thbs4/Trem1/Trem3	15	BP
GO:0019221	cytokine-mediated signaling pathway	29/460	410/17859	9.77855e-07	0.000160305	0.000129196	Arg1/Ccl11/Ccl12/Ccl24/Ccl3/Ccl4/Ccl7/Ccr1/Ccr1l1/Cx3cr1/Cxcl2/Cxcl3/Cxcr2/Ebi3/Ereg/Foxo3/Grem2/Il1a/Il1r2/Il1rap/Il1rl1/Il1rn/Il36rn/Irak2/Kras/Rabgef1/Slc1a1/Slit3/Tnfrsf1b	29	BP
GO:0072593	reactive oxygen species metabolic process	21/460	240/17859	1.14249e-06	0.000178242	0.000143653	Acp5/Atp7a/Birc3/Bnip3/Cdkn1a/Ddit4/Foxo3/Gadd45a/Gch1/Hk2/Ier3/Itgam/Mmp8/Ngfr/Nos2/Olr1/Pmaip1/Sesn2/Slc1a1/Snca/Thbs1	21	BP
GO:0050673	epithelial cell proliferation	31/460	460/17859	1.15742e-06	0.000178242	0.000143653	Adora2b/Areg/Arg1/Atp7a/Bmp6/Ccl11/Ccl24/Cdh3/Cldn1/Dlk1/Ereg/Ern1/Esrp1/Fermt1/Fst/Has2/Il10/Ngfr/Nos2/Osr1/Pgf/Pik3cb/Plxnb3/Ppard/Runx3/Serpinb5/Shh/Tacstd2/Tgm1/Thbs1/Thbs4	31	BP
GO:0045765	regulation of angiogenesis	24/460	303/17859	1.19795e-06	0.000179058	0.00014431	Abcc8/Adamts1/Ccl11/Ccl24/Cma1/Crhr2/Cx3cr1/Cxcr2/Ereg/Gadd45a/Grem1/Hk2/Il10/Il1a/Lif/Ngfr/Pgf/Pik3cb/Ppp1r15a/Ptgis/Sema3e/Shh/Thbs1/Thbs4	24	BP
GO:1901342	regulation of vasculature development	24/460	307/17859	1.5111e-06	0.000219412	0.000176833	Abcc8/Adamts1/Ccl11/Ccl24/Cma1/Crhr2/Cx3cr1/Cxcr2/Ereg/Gadd45a/Grem1/Hk2/Il10/Il1a/Lif/Ngfr/Pgf/Pik3cb/Ppp1r15a/Ptgis/Sema3e/Shh/Thbs1/Thbs4	24	BP
GO:1901214	regulation of neuron death	28/460	400/17859	1.84653e-06	0.000260668	0.000210083	Adora2a/Amigo2/Atp7a/Bcl2l1/Ccl3/Clcf1/Cx3cr1/Ddit3/Ddit4/Egln3/Eno2/Fcgr2b/Foxo3/Il10/Itgam/Kcnma1/Kras/Mag/Ngf/Ngfr/Ntf4/Pmaip1/Rest/Shh/Slc1a1/Snca/Sncb/Tnfrsf1b	28	BP
GO:0002548	monocyte chemotaxis	10/460	58/17859	2.01029e-06	0.000276117	0.000222534	Ccl11/Ccl12/Ccl24/Ccl3/Ccl4/Ccl7/Ccr1/Ccr1l1/Cx3cr1/Grem1	10	BP
GO:0001818	negative regulation of cytokine production	23/460	291/17859	2.07351e-06	0.000277305	0.000223491	Acp5/Apod/Arg1/C1qtnf3/Cd274/Cdh3/Cx3cr1/Ddit3/Elane/Fcgr2b/Il10/Il1r2/Il1rl1/Il23a/Il36rn/Lgals7/Mmp8/Nlrp3/Pglyrp1/Rabgef1/Srgn/Thbs1/Tlr9	23	BP
GO:0070555	response to interleukin-1	17/460	171/17859	2.12982e-06	0.000277532	0.000223675	Bcl2l1/Ccl11/Ccl12/Ccl24/Ccl3/Ccl4/Ccl7/Cxcl2/Has2/Il1a/Il1r2/Il1rn/Irak2/Nos2/Ptgis/Sele/Snca	17	BP
GO:0032103	positive regulation of response to external stimulus	29/460	427/17859	2.20909e-06	0.000280665	0.0002262	Adora2b/Arg1/Bmp6/Ccl24/Ccl3/Ccl4/Ccl7/Ccr1/Ccr1l1/Cx3cr1/Cxcl14/Cxcr2/Ereg/Fkbp1b/Il1rl1/Il23a/Klk7/Mmp8/Nrg1/Pgf/Plscr1/Ptgs2/Shh/Snca/Thbs1/Thbs4/Tlr9/Trem1/Trem3	29	BP
GO:0002690	positive regulation of leukocyte chemotaxis	13/460	103/17859	2.41202e-06	0.000298973	0.000240954	Ccl3/Ccl4/Ccl7/Ccr1/Ccr1l1/Cx3cr1/Cxcl14/Cxcr2/Il23a/Pgf/Thbs1/Thbs4/Trem1	13	BP
GO:0071347	cellular response to interleukin-1	15/460	137/17859	2.5439e-06	0.000307812	0.000248078	Bcl2l1/Ccl11/Ccl12/Ccl24/Ccl3/Ccl4/Ccl7/Cxcl2/Has2/Il1a/Il1r2/Il1rn/Irak2/Nos2/Ptgis	15	BP
GO:0031640	killing of cells of other organism	12/460	89/17859	2.91128e-06	0.000344073	0.000277302	Arg1/Ccl11/Ccl12/Cxcl14/Cxcl2/Cxcl3/Defb14/Elane/Nos2/Pglyrp1/Trem1/Trem3	12	BP
GO:0042060	wound healing	29/460	435/17859	3.18617e-06	0.000368003	0.000296588	Abcc8/Adra2a/Ajap1/Anxa8/Cdh3/Cdkn1a/Cela2a/Cldn1/Cldn4/Clec10a/Cxcl2/F13a1/F2rl2/Fermt1/Fmod/Gna13/Il1a/Ltbp1/Nos2/Nrg1/Pik3cb/Plek/Plet1/Pou2f3/Ppard/Selp/Shh/Thbs1/Wnt5b	29	BP
GO:0062012	regulation of small molecule metabolic process	26/460	370/17859	4.02724e-06	0.00044557	0.000359103	Adora2b/Ak4/Bcl2l1/Bmp6/C1qtnf3/Ddit4/Dgat2/Fmo5/Gk/Ier3/Insig2/Kcnma1/Nos2/Pfkfb3/Plek/Pmaip1/Ppard/Ppp1r3b/Ppp1r3d/Ptgs2/Rdh10/Rest/Sesn2/Slc45a3/Snca/Trib3	26	BP
GO:0048245	eosinophil chemotaxis	6/460	18/17859	4.0331e-06	0.00044557	0.000359103	Ccl11/Ccl12/Ccl24/Ccl3/Ccl4/Ccl7	6	BP
GO:0032768	regulation of monooxygenase activity	9/460	50/17859	4.52599e-06	0.000488779	0.000393927	Atp7a/Cdh3/Fgf23/Gch1/Gla/Il1a/Kras/Pik3cb/Snca	9	BP
GO:0098742	cell-cell adhesion via plasma-membrane adhesion molecules	20/460	241/17859	4.61656e-06	0.000488779	0.000393927	Amigo2/Cdh19/Cdh3/Celsr2/Cldn1/Cldn11/Dsg4/Igsf11/Il10/Il1rap/Il1rn/Lgals7/Mag/Mpz/Nrg1/Pik3cb/Plxnb3/Ret/Sele/Selp	20	BP
GO:0043523	regulation of neuron apoptotic process	22/460	284/17859	4.78291e-06	0.000496056	0.000399791	Adora2a/Amigo2/Atp7a/Bcl2l1/Ccl3/Clcf1/Cx3cr1/Ddit3/Egln3/Foxo3/Il10/Itgam/Kcnma1/Kras/Mag/Ngf/Ngfr/Ntf4/Pmaip1/Slc1a1/Snca/Sncb	22	BP
GO:2000503	positive regulation of natural killer cell chemotaxis	4/460	6/17859	6.25516e-06	0.000635774	0.000512396	Ccl3/Ccl4/Ccl7/Cxcl14	4	BP
GO:0002688	regulation of leukocyte chemotaxis	14/460	131/17859	7.28147e-06	0.000725577	0.000584772	Ccl3/Ccl4/Ccl7/Ccr1/Ccr1l1/Cx3cr1/Cxcl14/Cxcr2/Grem1/Il23a/Pgf/Thbs1/Thbs4/Trem1	14	BP
GO:0002274	myeloid leukocyte activation	20/460	250/17859	8.0034e-06	0.000782178	0.000630389	Adora2b/Batf3/Ccl3/Clec4d/Cx3cr1/Cxcr2/Gab2/Il10/Il1rl1/Itgam/Mmp8/Nampt/Pla2g2a/Plscr1/Rabgef1/Slc7a2/Snca/Stx11/Thbs1/Tlr9	20	BP
GO:0036294	cellular response to decreased oxygen levels	18/460	211/17859	9.43112e-06	0.00090432	0.000728828	Ak4/Atp7a/Bach1/Bcl2l1/Bnip3/Egln3/Ero1a/Foxo3/Hif3a/Mgarp/Nampt/Pik3cb/Pmaip1/Ppard/Ppp1r15a/Ptgis/Ptgs2/Slc2a4	18	BP
GO:0040013	negative regulation of locomotion	24/460	350/17859	1.4205e-05	0.00133685	0.00107742	Abcc8/Adora2a/Apod/Arrdc3/Cx3cr1/Foxo3/Gadd45a/Gna13/Grem1/Has1/Il1rn/Kiss1r/Ngfr/Nrg1/Pfn2/Plxnb3/Ppard/Rabgef1/Sema3e/Sema4d/Shh/Tacstd2/Thbs1/Trib1	24	BP
GO:0072677	eosinophil migration	6/460	22/17859	1.48498e-05	0.00137213	0.00110585	Ccl11/Ccl12/Ccl24/Ccl3/Ccl4/Ccl7	6	BP
GO:0001935	endothelial cell proliferation	15/460	159/17859	1.58776e-05	0.0014409	0.00116128	Adora2b/Arg1/Bmp6/Ccl11/Ccl24/Dlk1/Ern1/Il10/Ngfr/Nos2/Pgf/Pik3cb/Plxnb3/Thbs1/Thbs4	15	BP
GO:0071456	cellular response to hypoxia	16/460	181/17859	1.88997e-05	0.00166977	0.00134574	Ak4/Atp7a/Bach1/Bcl2l1/Bnip3/Egln3/Ero1a/Foxo3/Hif3a/Mgarp/Pik3cb/Pmaip1/Ppard/Ptgis/Ptgs2/Slc2a4	16	BP
GO:0045229	external encapsulating structure organization	22/460	310/17859	1.90568e-05	0.00166977	0.00134574	Adamts1/Adamts15/Atp7a/Cma1/Col13a1/Ero1a/Fermt1/Fmod/Gfap/Grem1/Has1/Has2/Lamb3/Mmp10/Mmp8/P4ha1/Serpinb5/Tgm3/Tmem38b/Tnfrsf1b/Tpsab1/Wt1	22	BP
GO:0071695	anatomical structure maturation	21/460	288/17859	1.9656e-05	0.00169308	0.00136452	Bcl11a/Cdh3/Cdkn1a/Cx3cr1/Ddit3/Ereg/Fermt1/Foxo3/Gldn/Grem1/Kcnma1/Lgi4/Ngf/Plp1/Pou2f2/Ret/Rnd1/Runx3/Sema4d/Sox10/Tfcp2l1	21	BP
GO:2000377	regulation of reactive oxygen species metabolic process	15/460	164/17859	2.29563e-05	0.0019444	0.00156707	Acp5/Birc3/Bnip3/Cdkn1a/Foxo3/Gadd45a/Gch1/Hk2/Ier3/Itgam/Mmp8/Ngfr/Olr1/Snca/Thbs1	15	BP
GO:0031643	positive regulation of myelination	6/460	24/17859	2.5641e-05	0.00213619	0.00172164	Mag/Ncmap/Ngfr/Nrg1/Sox10/Tnfrsf1b	6	BP
GO:0031348	negative regulation of defense response	18/460	228/17859	2.69752e-05	0.0022111	0.00178201	Acp5/Adora2a/Aoah/Arg1/C1qtnf3/Ccr1/Cx3cr1/Fcgr2b/Ier3/Il10/Nlrp3/Pglyrp1/Ppard/Ptgis/Rabgef1/Slpi/Tnfaip6/Tnfrsf1b	18	BP
GO:0006584	catecholamine metabolic process	9/460	62/17859	2.78819e-05	0.002214	0.00178435	Atp7a/Crhr2/Gch1/Hand2/Hdc/Itgam/Slc1a1/Snca/Sncb	9	BP
GO:0009712	catechol-containing compound metabolic process	9/460	62/17859	2.78819e-05	0.002214	0.00178435	Atp7a/Crhr2/Gch1/Hand2/Hdc/Itgam/Slc1a1/Snca/Sncb	9	BP
GO:0032102	negative regulation of response to external stimulus	25/460	392/17859	3.19885e-05	0.00250101	0.00201567	Abcc8/Acp5/Adora2a/Ajap1/Aoah/Arg1/C1qtnf3/Ccr1/Cx3cr1/Fcgr2b/Grem1/Ier3/Il10/Nlrp3/Pglyrp1/Ppard/Ptgis/Rabgef1/Sema3e/Sema4d/Slpi/Thbs1/Tnfaip6/Tnfrsf1b/Trib1	25	BP
GO:0070374	positive regulation of ERK1 and ERK2 cascade	18/460	232/17859	3.39833e-05	0.00261672	0.00210892	C1qtnf3/Ccl11/Ccl12/Ccl24/Ccl3/Ccl4/Ccl7/Ccr1/Fgf23/Hand2/Il1a/Mturn/Ngf/Nrg1/Olr35/Pdgfc/Pla2g2a/Ramp3	18	BP
GO:0071453	cellular response to oxygen levels	18/460	233/17859	3.59706e-05	0.00270001	0.00217604	Ak4/Atp7a/Bach1/Bcl2l1/Bnip3/Egln3/Ero1a/Foxo3/Hif3a/Mgarp/Nampt/Pik3cb/Pmaip1/Ppard/Ppp1r15a/Ptgis/Ptgs2/Slc2a4	18	BP
GO:0046888	negative regulation of hormone secretion	11/460	96/17859	3.61276e-05	0.00270001	0.00217604	Abcc8/Adra2a/Crhr2/Fgf23/Fkbp1b/Fst/Il11/Lif/Nrg1/Rab11fip1/Rest	11	BP
GO:0070372	regulation of ERK1 and ERK2 cascade	22/460	327/17859	4.29371e-05	0.00316241	0.00254871	Atf3/C1qtnf3/Ccl11/Ccl12/Ccl24/Ccl3/Ccl4/Ccl7/Ccr1/Crhr2/Fgf23/Hand2/Il1a/Lif/Mturn/Ngf/Nrg1/Olr35/Pdgfc/Pla2g2a/Ramp3/Tlr9	22	BP
GO:0044262	cellular carbohydrate metabolic process	21/460	304/17859	4.36115e-05	0.00316619	0.00255176	Adora2b/Aoah/C1qtnf3/Ddit4/Dgat2/Gk/Has1/Has2/Hk2/Ier3/Mtmr7/Pfkfb3/Plek/Pmaip1/Ppp1r3b/Ppp1r3d/Pygl/Sesn2/Slc45a3/Snca/Tpi1	21	BP
GO:0021782	glial cell development	13/460	135/17859	4.67738e-05	0.00330302	0.00266203	Adora2a/Gfap/Itgam/Kras/Lamc3/Lgi4/Mag/Ncmap/Nrg1/Plp1/Prx/Shh/Sox10	13	BP
GO:0046942	carboxylic acid transport	21/460	306/17859	4.79631e-05	0.00330302	0.00266203	Adora2a/Aqp9/Arg1/Gfap/Hnf1a/Il1a/Il1rn/Kiss1r/Nos2/Pla2g2a/Sfxn2/Slc16a11/Slc16a3/Slc1a1/Slc26a9/Slc32a1/Slc47a1/Slc6a13/Slc6a6/Slc7a2/Snca	21	BP
GO:0034341	response to interferon-gamma	14/460	155/17859	4.91375e-05	0.00330302	0.00266203	Arg1/Ccl11/Ccl12/Ccl24/Ccl3/Ccl4/Ccl7/Cldn1/Flnb/Gch1/Nos2/Rab20/Snca/Stx11	14	BP
GO:0035747	natural killer cell chemotaxis	4/460	9/17859	4.93958e-05	0.00330302	0.00266203	Ccl3/Ccl4/Ccl7/Cxcl14	4	BP
GO:0048263	determination of dorsal identity	4/460	9/17859	4.93958e-05	0.00330302	0.00266203	Ddit3/Grem1/Grem2/Sostdc1	4	BP
GO:2000501	regulation of natural killer cell chemotaxis	4/460	9/17859	4.93958e-05	0.00330302	0.00266203	Ccl3/Ccl4/Ccl7/Cxcl14	4	BP
GO:0031960	response to corticosteroid	22/460	331/17859	5.14909e-05	0.00331349	0.00267047	Areg/Arg1/Bcl2l1/Bmp6/Cdkn1a/Cldn1/Crhr2/Cxcl2/Ddit4/Foxo3/H19/Il10/Il1rn/Junb/Kcnma1/Kras/Ngf/Nos2/Prss8/Ptgs2/Rest/Slit3	22	BP
GO:1901215	negative regulation of neuron death	19/460	262/17859	5.2273e-05	0.00331349	0.00267047	Adora2a/Amigo2/Atp7a/Bcl2l1/Clcf1/Cx3cr1/Eno2/Il10/Kras/Mag/Ngf/Ngfr/Ntf4/Rest/Shh/Slc1a1/Snca/Sncb/Tnfrsf1b	19	BP
GO:0030198	extracellular matrix organization	21/460	308/17859	5.26986e-05	0.00331349	0.00267047	Adamts1/Adamts15/Atp7a/Cma1/Col13a1/Ero1a/Fermt1/Fmod/Gfap/Grem1/Has1/Has2/Lamb3/Mmp10/Mmp8/P4ha1/Serpinb5/Tmem38b/Tnfrsf1b/Tpsab1/Wt1	21	BP
GO:0009713	catechol-containing compound biosynthetic process	6/460	27/17859	5.28124e-05	0.00331349	0.00267047	Atp7a/Crhr2/Gch1/Hand2/Hdc/Snca	6	BP
GO:0042423	catecholamine biosynthetic process	6/460	27/17859	5.28124e-05	0.00331349	0.00267047	Atp7a/Crhr2/Gch1/Hand2/Hdc/Snca	6	BP
GO:0042063	gliogenesis	24/460	380/17859	5.35388e-05	0.0033181	0.00267419	Abcc8/Adora2a/Areg/Bnip3/Ccl3/Clcf1/Cx3cr1/Efemp1/Gfap/Gpr37l1/Itgam/Kras/Lamc3/Lgi4/Lif/Mag/Ncmap/Nrg1/Plp1/Prx/Shh/Slc45a3/Sox10/Tnfrsf1b	24	BP
GO:0043062	extracellular structure organization	21/460	309/17859	5.52193e-05	0.00338102	0.0027249	Adamts1/Adamts15/Atp7a/Cma1/Col13a1/Ero1a/Fermt1/Fmod/Gfap/Grem1/Has1/Has2/Lamb3/Mmp10/Mmp8/P4ha1/Serpinb5/Tmem38b/Tnfrsf1b/Tpsab1/Wt1	21	BP
GO:0050679	positive regulation of epithelial cell proliferation	17/460	221/17859	6.2173e-05	0.00376147	0.00303152	Adora2b/Arg1/Atp7a/Bmp6/Ccl11/Ccl24/Cdh3/Cldn1/Esrp1/Has2/Il10/Osr1/Pgf/Plxnb3/Shh/Tgm1/Thbs4	17	BP
GO:0009309	amine biosynthetic process	7/460	40/17859	6.41692e-05	0.00378986	0.0030544	Atp7a/Crhr2/Gch1/Hand2/Hdc/Sat1/Snca	7	BP
GO:0042401	cellular biogenic amine biosynthetic process	7/460	40/17859	6.41692e-05	0.00378986	0.0030544	Atp7a/Crhr2/Gch1/Hand2/Hdc/Sat1/Snca	7	BP
GO:0072088	nephron epithelium morphogenesis	10/460	85/17859	6.48796e-05	0.00378986	0.0030544	Ahi1/Foxd1/Grem1/Lif/Osr1/Pgf/Shh/Tacstd2/Wnt6/Wt1	10	BP
GO:0043090	amino acid import	8/460	54/17859	6.70492e-05	0.0038414	0.00309594	Gfap/Sfxn2/Slc1a1/Slc22a4/Slc47a1/Slc6a13/Slc6a6/Slc7a2	8	BP
GO:0001763	morphogenesis of a branching structure	18/460	245/17859	6.92532e-05	0.0038414	0.00309594	Areg/Bcl11a/Ccl11/Col13a1/Esrp1/Foxd1/Gna13/Grem1/Il10/Kras/Pgf/Rdh10/Sema3e/Shh/Sox10/Tacstd2/Wnt6/Wt1	18	BP
GO:0006576	cellular biogenic amine metabolic process	11/460	103/17859	6.95389e-05	0.0038414	0.00309594	Atp7a/Crhr2/Gch1/Hand2/Hdc/Itgam/Sat1/Slc1a1/Smox/Snca/Sncb	11	BP
GO:0051702	biological process involved in interaction with symbiont	11/460	103/17859	6.95389e-05	0.0038414	0.00309594	Arg1/Ccl12/Ccl3/Ccl4/Cx3cr1/Defb14/Elane/Pou2f3/Rest/Trem1/Trem3	11	BP
GO:0050921	positive regulation of chemotaxis	14/460	160/17859	6.95414e-05	0.0038414	0.00309594	Ccl3/Ccl4/Ccl7/Ccr1/Ccr1l1/Cx3cr1/Cxcl14/Cxcr2/Il23a/Pgf/Shh/Thbs1/Thbs4/Trem1	14	BP
GO:0050678	regulation of epithelial cell proliferation	24/460	388/17859	7.41642e-05	0.00405272	0.00326625	Adora2b/Arg1/Atp7a/Bmp6/Ccl11/Ccl24/Cdh3/Cldn1/Dlk1/Esrp1/Has2/Il10/Ngfr/Osr1/Pgf/Plxnb3/Ppard/Runx3/Serpinb5/Shh/Tacstd2/Tgm1/Thbs1/Thbs4	24	BP
GO:0032689	negative regulation of interferon-gamma production	7/460	41/17859	7.56814e-05	0.00409162	0.00329761	Cd274/Ddit3/Il10/Il1rl1/Il36rn/Lgals7/Pglyrp1	7	BP
GO:0043281	regulation of cysteine-type endopeptidase activity involved in apoptotic process	17/460	225/17859	7.7661e-05	0.00415445	0.00334824	Adora2a/Bcl2l1/Birc3/Egln3/Fcmr/Ngf/Ngfr/Nlrp3/Pak2/Plaur/Pmaip1/Ptgs2/Rest/Ret/Slc1a1/Snca/Thbs1	17	BP
GO:0048262	determination of dorsal/ventral asymmetry	4/460	10/17859	8.06512e-05	0.00426947	0.00344094	Ddit3/Grem1/Grem2/Sostdc1	4	BP
GO:0098657	import into cell	17/460	226/17859	8.20274e-05	0.00429756	0.00346358	Gfap/Kcnd3/Kcnj12/Kcnj15/Kcnj2/Nat8l/Ramp3/Slc1a1/Slc22a4/Slc2a1/Slc47a1/Slc6a13/Slc6a4/Slc6a6/Slc7a2/Snca/Thbs1	17	BP
GO:0021700	developmental maturation	22/460	342/17859	8.33985e-05	0.00432481	0.00348554	Bcl11a/Cdh3/Cdkn1a/Cx3cr1/Ddit3/Ereg/Fermt1/Foxo3/Gldn/Grem1/Kcnma1/Lgi4/Ngf/Nrg2/Plp1/Pou2f2/Ret/Rnd1/Runx3/Sema4d/Sox10/Tfcp2l1	22	BP
GO:0071674	mononuclear cell migration	15/460	184/17859	8.69384e-05	0.00444054	0.00357881	Apod/Ccl11/Ccl12/Ccl24/Ccl3/Ccl4/Ccl7/Ccr1/Ccr1l1/Cx3cr1/Cxcl14/Grem1/Slamf9/Thbs1/Trem1	15	BP
GO:0072028	nephron morphogenesis	10/460	88/17859	8.73779e-05	0.00444054	0.00357881	Ahi1/Foxd1/Grem1/Lif/Osr1/Pgf/Shh/Tacstd2/Wnt6/Wt1	10	BP
GO:2000116	regulation of cysteine-type endopeptidase activity	18/460	251/17859	9.44125e-05	0.00475054	0.00382865	Adora2a/Bcl2l1/Birc3/Egln3/Fcmr/Ngf/Ngfr/Nlrp3/Pak2/Perp/Plaur/Pmaip1/Ptgs2/Rest/Ret/Slc1a1/Snca/Thbs1	18	BP
GO:0046184	aldehyde biosynthetic process	5/460	19/17859	9.56677e-05	0.0047665	0.00384152	Bmp6/Cyp11b2/Kdm3a/Rest/Tpi1	5	BP
GO:0030336	negative regulation of cell migration	20/460	298/17859	9.81349e-05	0.00479891	0.00386763	Abcc8/Apod/Cx3cr1/Foxo3/Gadd45a/Gna13/Grem1/Has1/Il1rn/Kiss1r/Ngfr/Nrg1/Pfn2/Plxnb3/Ppard/Rabgef1/Shh/Tacstd2/Thbs1/Trib1	20	BP
GO:1903531	negative regulation of secretion by cell	15/460	186/17859	9.82067e-05	0.00479891	0.00386763	Abcc8/Adra2a/Crhr2/Fgf23/Fkbp1b/Fst/Il11/Il1rn/Lif/Nrg1/Rab11fip1/Rabgef1/Rest/Snca/Tnfrsf1b	15	BP
GO:0018958	phenol-containing compound metabolic process	12/460	126/17859	0.00010125	0.00485427	0.00391225	Atp2b2/Atp7a/Cdh3/Crhr2/Dio3/Gch1/Hand2/Hdc/Itgam/Slc1a1/Snca/Sncb	12	BP
GO:0030282	bone mineralization	12/460	126/17859	0.00010125	0.00485427	0.00391225	Asgr2/Bmp6/Ccl3/Ccr1/Dlk1/Fgf23/Grem1/Osr1/Ptgs2/Sgms2/Srgn/Tmem38b	12	BP
GO:0043524	negative regulation of neuron apoptotic process	15/460	187/17859	0.000104304	0.00495395	0.00399259	Adora2a/Amigo2/Atp7a/Bcl2l1/Clcf1/Cx3cr1/Il10/Kras/Mag/Ngf/Ngfr/Ntf4/Slc1a1/Snca/Sncb	15	BP
GO:0071346	cellular response to interferon-gamma	12/460	127/17859	0.000109259	0.00511352	0.00412119	Arg1/Ccl11/Ccl12/Ccl24/Ccl3/Ccl4/Ccl7/Cldn1/Flnb/Nos2/Rab20/Stx11	12	BP
GO:0000302	response to reactive oxygen species	19/460	277/17859	0.000109676	0.00511352	0.00412119	Apod/Areg/Arg1/Atp7a/Bcl2l1/Bnip3/Ddit3/Ern1/Fkbp1b/Foxo3/Gch1/Gja3/Gpr37l1/Il10/Il1a/Kdm6b/Ngf/Olr1/Sesn2	19	BP
GO:0010959	regulation of metal ion transport	26/460	449/17859	0.000110921	0.00511542	0.00412272	Abcc8/Adora2a/Adra2a/Atp2b2/Atp7a/Ccl3/Ccl4/Ccr1/Crhr2/Fgf11/Fkbp1b/Fxyd4/Fxyd7/Gstm7/Kcnj2/Ngf/Osr1/Plp1/Prss8/Ptgs2/Ramp3/Rrad/Saraf/Snca/Tlr9/Tmem38b	26	BP
GO:0052547	regulation of peptidase activity	27/460	475/17859	0.00011173	0.00511542	0.00412272	Adora2a/Anxa8/Bcl2l1/Birc3/Cldn4/Egln3/Fcmr/Ngf/Ngfr/Nlrp3/Pak2/Perp/Plaur/Pmaip1/Ptgs2/Rest/Ret/Serpina1/Serpinb5/Serpini1/Slc1a1/Slpi/Slpil2/Snca/Stfa2l1/Stfa3/Thbs1	27	BP
GO:0048708	astrocyte differentiation	10/460	91/17859	0.000116167	0.00527109	0.00424819	Adora2a/Clcf1/Gfap/Gpr37l1/Kras/Lamc3/Lif/Mag/Plp1/Shh	10	BP
GO:0070371	ERK1 and ERK2 cascade	22/460	351/17859	0.000121528	0.00542386	0.0043713	Atf3/C1qtnf3/Ccl11/Ccl12/Ccl24/Ccl3/Ccl4/Ccl7/Ccr1/Crhr2/Fgf23/Hand2/Il1a/Lif/Mturn/Ngf/Nrg1/Olr35/Pdgfc/Pla2g2a/Ramp3/Tlr9	22	BP
GO:0051384	response to glucocorticoid	20/460	303/17859	0.000122987	0.00542386	0.0043713	Areg/Arg1/Bcl2l1/Bmp6/Cdkn1a/Cldn1/Crhr2/Cxcl2/Ddit4/Foxo3/H19/Il10/Il1rn/Junb/Kras/Ngf/Nos2/Ptgs2/Rest/Slit3	20	BP
GO:0007171	activation of transmembrane receptor protein tyrosine kinase activity	4/460	11/17859	0.000124161	0.00542386	0.0043713	Grem1/Ngf/Nrg1/Pdgfc	4	BP
GO:0030502	negative regulation of bone mineralization	5/460	20/17859	0.00012487	0.00542386	0.0043713	Ccl3/Ccr1/Fgf23/Grem1/Srgn	5	BP
GO:0051797	regulation of hair follicle development	5/460	20/17859	0.00012487	0.00542386	0.0043713	Cdh3/Fermt1/Fst/Krt17/Ngfr	5	BP
GO:0016525	negative regulation of angiogenesis	11/460	110/17859	0.000126529	0.00544934	0.00439184	Abcc8/Adamts1/Crhr2/Cx3cr1/Gadd45a/Lif/Ngfr/Pik3cb/Sema3e/Thbs1/Thbs4	11	BP
GO:0052548	regulation of endopeptidase activity	26/460	454/17859	0.000132467	0.00564734	0.00455142	Adora2a/Anxa8/Bcl2l1/Birc3/Egln3/Fcmr/Ngf/Ngfr/Nlrp3/Pak2/Perp/Plaur/Pmaip1/Ptgs2/Rest/Ret/Serpina1/Serpinb5/Serpini1/Slc1a1/Slpi/Slpil2/Snca/Stfa2l1/Stfa3/Thbs1	26	BP
GO:0031214	biomineral tissue development	14/460	170/17859	0.000133349	0.00564734	0.00455142	Asgr2/Atp2b2/Bmp6/Ccl3/Ccr1/Dlk1/Fgf23/Grem1/Osr1/Ptgs2/Sgms2/Srgn/Tmem38b/Wnt6	14	BP
GO:0007162	negative regulation of cell adhesion	20/460	306/17859	0.000140434	0.00586309	0.0047253	Acp5/Adora2a/Ajap1/Apod/Arg1/Bmp6/Cd274/Il10/Il1rn/Lgals7/Pag1/Plet1/Plxnb3/Rnd1/Runx3/Sema3e/Sema4d/Shh/Tacstd2/Thbs1	20	BP
GO:0001503	ossification	25/460	430/17859	0.000140751	0.00586309	0.0047253	Acp5/Areg/Asgr2/Bmp6/Ccl3/Ccr1/Col13a1/Dlk1/Fgf23/Fndc3b/Grem1/Hand2/Junb/Mmp8/Osr1/Ptgs2/Pthlh/Rest/Runx3/Satb2/Sema4d/Sgms2/Shh/Srgn/Tmem38b	25	BP
GO:0002544	chronic inflammatory response	6/460	32/17859	0.000144971	0.00594149	0.00478849	Adora2b/Ccl11/Cx3cr1/Il10/Il1rn/Thbs1	6	BP
GO:0032770	positive regulation of monooxygenase activity	6/460	32/17859	0.000144971	0.00594149	0.00478849	Atp7a/Cdh3/Fgf23/Gch1/Kras/Pik3cb	6	BP
GO:2000181	negative regulation of blood vessel morphogenesis	11/460	112/17859	0.000148744	0.00604735	0.0048738	Abcc8/Adamts1/Crhr2/Cx3cr1/Gadd45a/Lif/Ngfr/Pik3cb/Sema3e/Thbs1/Thbs4	11	BP
GO:0110148	biomineralization	14/460	172/17859	0.000150913	0.00607486	0.00489598	Asgr2/Atp2b2/Bmp6/Ccl3/Ccr1/Dlk1/Fgf23/Grem1/Osr1/Ptgs2/Sgms2/Srgn/Tmem38b/Wnt6	14	BP
GO:0010001	glial cell differentiation	19/460	284/17859	0.000151812	0.00607486	0.00489598	Adora2a/Bnip3/Clcf1/Gfap/Gpr37l1/Itgam/Kras/Lamc3/Lgi4/Lif/Mag/Ncmap/Nrg1/Plp1/Prx/Shh/Slc45a3/Sox10/Tnfrsf1b	19	BP
GO:0009913	epidermal cell differentiation	15/460	194/17859	0.000157012	0.00621353	0.00500774	Atp2b2/Cdh3/Dsg4/Esrp1/Flnb/Fosl2/Il1a/Kcnma1/Krt17/Maff/Pls1/Pou2f3/Rest/Tgm1/Tgm3	15	BP
GO:0045123	cellular extravasation	9/460	77/17859	0.000157722	0.00621353	0.00500774	Add2/Cx3cr1/Elane/Il1a/Itgam/Sele/Selp/Trem1/Trem3	9	BP
GO:1901343	negative regulation of vasculature development	11/460	113/17859	0.000161041	0.00626539	0.00504953	Abcc8/Adamts1/Crhr2/Cx3cr1/Gadd45a/Lif/Ngfr/Pik3cb/Sema3e/Thbs1/Thbs4	11	BP
GO:0046879	hormone secretion	23/460	383/17859	0.000161505	0.00626539	0.00504953	Abcc8/Adra2a/Bmp6/C1qtnf3/Cela2a/Crhr2/Fam3b/Fgf23/Fkbp1b/Foxd1/Fst/Hnf1a/Il11/Il1rn/Kiss1r/Lif/Nos2/Nrg1/Osbp/Ppard/Rab11fip1/Rest/Rph3al	23	BP
GO:0045914	negative regulation of catecholamine metabolic process	3/460	5/17859	0.000163348	0.00628889	0.00506847	Atp7a/Itgam/Snca	3	BP
GO:0042476	odontogenesis	13/460	153/17859	0.000168431	0.00643582	0.00518689	Adamts1/Dlx3/Fmod/Fst/Hand2/Ngfr/Nrg1/Osr1/Perp/Shh/Sostdc1/Sp6/Wnt6	13	BP
GO:0050920	regulation of chemotaxis	17/460	240/17859	0.000170181	0.00645419	0.00520169	Ccl3/Ccl4/Ccl7/Ccr1/Ccr1l1/Cx3cr1/Cxcl14/Cxcr2/Grem1/Il23a/Pgf/Sema3e/Sema4d/Shh/Thbs1/Thbs4/Trem1	17	BP
GO:0071222	cellular response to lipopolysaccharide	20/460	312/17859	0.000181995	0.00685111	0.00552159	Arg1/Bmp6/Ccl3/Cd274/Cx3cr1/Cxcl2/Cxcl3/Fcgr2b/Il10/Il1a/Il36rn/Irak2/Nlrp3/Nos2/Plscr1/Ppard/Tlr9/Tnfrsf1b/Trem1/Trib1	20	BP
GO:0043616	keratinocyte proliferation	7/460	47/17859	0.00018534	0.00687517	0.00554098	Cdh3/Ereg/Fermt1/Fst/Has2/Ppard/Tgm1	7	BP
GO:0089718	amino acid import across plasma membrane	7/460	47/17859	0.00018534	0.00687517	0.00554098	Gfap/Slc1a1/Slc22a4/Slc47a1/Slc6a13/Slc6a6/Slc7a2	7	BP
GO:2000146	negative regulation of cell motility	20/460	314/17859	0.000198074	0.00729428	0.00587876	Abcc8/Apod/Cx3cr1/Foxo3/Gadd45a/Gna13/Grem1/Has1/Il1rn/Kiss1r/Ngfr/Nrg1/Pfn2/Plxnb3/Ppard/Rabgef1/Shh/Tacstd2/Thbs1/Trib1	20	BP
GO:0044106	cellular amine metabolic process	11/460	116/17859	0.000203236	0.00742526	0.00598432	Atp7a/Crhr2/Gch1/Hand2/Hdc/Itgam/Sat1/Slc1a1/Smox/Snca/Sncb	11	BP
GO:0001819	positive regulation of cytokine production	27/460	493/17859	0.000204553	0.00742526	0.00598432	Abcc8/Adora2b/Adra2a/C1qtnf3/Ccl3/Ccl4/Cd274/Crhr2/Ddit3/Dlk1/Elane/Ereg/Fermt1/Il10/Il17b/Il1a/Il1rap/Il1rl1/Il23a/Mcoln2/Mmp8/Nlrp3/Nos2/Pou2f2/Ptgs2/Thbs1/Tlr9	27	BP
GO:0098739	import across plasma membrane	14/460	178/17859	0.000216127	0.00778978	0.0062781	Gfap/Kcnd3/Kcnj12/Kcnj15/Kcnj2/Ramp3/Slc1a1/Slc22a4/Slc2a1/Slc47a1/Slc6a13/Slc6a6/Slc7a2/Thbs1	14	BP
GO:0007422	peripheral nervous system development	9/460	81/17859	0.000232972	0.00833776	0.00671974	Cldn1/Hand2/Lgi4/Ncmap/Ngf/Nrg1/Ntf4/Prx/Sox10	9	BP
GO:0002444	myeloid leukocyte mediated immunity	11/460	118/17859	0.000236282	0.00835665	0.00673496	Adora2b/Arg1/Ccl3/Cx3cr1/Elane/Gab2/Itgam/Rabgef1/Stx11/Trem1/Trem3	11	BP
GO:0045766	positive regulation of angiogenesis	14/460	180/17859	0.000242678	0.00835665	0.00673496	Ccl11/Ccl24/Cma1/Cx3cr1/Cxcr2/Ereg/Grem1/Hk2/Il10/Il1a/Pgf/Ptgis/Shh/Thbs1	14	BP
GO:1904018	positive regulation of vasculature development	14/460	180/17859	0.000242678	0.00835665	0.00673496	Ccl11/Ccl24/Cma1/Cx3cr1/Cxcr2/Ereg/Grem1/Hk2/Il10/Il1a/Pgf/Ptgis/Shh/Thbs1	14	BP
GO:0090183	regulation of kidney development	6/460	35/17859	0.000243252	0.00835665	0.00673496	Foxd1/Grem1/Osr1/Ret/Tacstd2/Wt1	6	BP
GO:0009914	hormone transport	23/460	394/17859	0.000243366	0.00835665	0.00673496	Abcc8/Adra2a/Bmp6/C1qtnf3/Cela2a/Crhr2/Fam3b/Fgf23/Fkbp1b/Foxd1/Fst/Hnf1a/Il11/Il1rn/Kiss1r/Lif/Nos2/Nrg1/Osbp/Ppard/Rab11fip1/Rest/Rph3al	23	BP
GO:0051346	negative regulation of hydrolase activity	23/460	394/17859	0.000243366	0.00835665	0.00673496	Adora2a/Anxa8/Bcl2l1/Birc3/Fcmr/Fkbp1b/Ngf/Pak2/Plaur/Plxnb3/Ppp1r15a/Ppp4r4/Ptgs2/Sema4d/Serpina1/Serpinb5/Serpini1/Slpi/Slpil2/Snca/Stfa2l1/Stfa3/Thbs1	23	BP
GO:0061138	morphogenesis of a branching epithelium	16/460	226/17859	0.000263958	0.00900291	0.00725581	Areg/Ccl11/Esrp1/Foxd1/Gna13/Grem1/Il10/Kras/Pgf/Rdh10/Sema3e/Shh/Sox10/Tacstd2/Wnt6/Wt1	16	BP
GO:0046189	phenol-containing compound biosynthetic process	7/460	50/17859	0.000275446	0.00918023	0.00739872	Atp7a/Cdh3/Crhr2/Gch1/Hand2/Hdc/Snca	7	BP
GO:0046883	regulation of hormone secretion	20/460	322/17859	0.00027556	0.00918023	0.00739872	Abcc8/Adra2a/Bmp6/C1qtnf3/Cela2a/Crhr2/Fgf23/Fkbp1b/Fst/Hnf1a/Il11/Kiss1r/Lif/Nos2/Nrg1/Osbp/Ppard/Rab11fip1/Rest/Rph3al	20	BP
GO:0051271	negative regulation of cellular component movement	20/460	322/17859	0.00027556	0.00918023	0.00739872	Abcc8/Apod/Cx3cr1/Foxo3/Gadd45a/Gna13/Grem1/Has1/Il1rn/Kiss1r/Ngfr/Nrg1/Pfn2/Plxnb3/Ppard/Rabgef1/Shh/Tacstd2/Thbs1/Trib1	20	BP
GO:0042116	macrophage activation	10/460	101/17859	0.000276382	0.00918023	0.00739872	Cx3cr1/Il10/Il1rl1/Itgam/Mmp8/Nampt/Slc7a2/Snca/Thbs1/Tlr9	10	BP
GO:0072073	kidney epithelium development	13/460	161/17859	0.00027876	0.00919801	0.00741305	Ahi1/Cxcr2/Foxd1/Grem1/Lif/Osr1/Pgf/Ret/Shh/Sim1/Tacstd2/Wnt6/Wt1	13	BP
GO:0007565	female pregnancy	19/460	298/17859	0.000280537	0.00919801	0.00741305	Abcc8/Adra2a/Arg1/Atp7a/Cldn4/Endou/Fosl2/Il1rn/Junb/Kras/Lif/Nampt/Pgf/Ppard/Ptgis/Ptgs2/Slc2a1/Sostdc1/Sts	19	BP
GO:0050731	positive regulation of peptidyl-tyrosine phosphorylation	15/460	205/17859	0.000286379	0.00928691	0.00748469	Adra2a/Areg/Bmp6/Cass4/Clcf1/Ereg/Grem1/Il11/Il23a/Lif/Nrg1/Osbp/Pak2/Sema4d/Thbs4	15	BP
GO:0071219	cellular response to molecule of bacterial origin	20/460	323/17859	0.000286904	0.00928691	0.00748469	Arg1/Bmp6/Ccl3/Cd274/Cx3cr1/Cxcl2/Cxcl3/Fcgr2b/Il10/Il1a/Il36rn/Irak2/Nlrp3/Nos2/Plscr1/Ppard/Tlr9/Tnfrsf1b/Trem1/Trib1	20	BP
GO:0001936	regulation of endothelial cell proliferation	12/460	141/17859	0.000292955	0.00942276	0.00759418	Adora2b/Arg1/Bmp6/Ccl11/Ccl24/Dlk1/Il10/Ngfr/Pgf/Plxnb3/Thbs1/Thbs4	12	BP
GO:0071216	cellular response to biotic stimulus	21/460	349/17859	0.000299947	0.00958699	0.00772654	Arg1/Bmp6/Ccl3/Cd274/Cx3cr1/Cxcl2/Cxcl3/Ddit3/Fcgr2b/Il10/Il1a/Il36rn/Irak2/Nlrp3/Nos2/Plscr1/Ppard/Tlr9/Tnfrsf1b/Trem1/Trib1	21	BP
GO:0010951	negative regulation of endopeptidase activity	18/460	276/17859	0.000306913	0.00969578	0.00781422	Adora2a/Anxa8/Bcl2l1/Birc3/Fcmr/Ngf/Pak2/Plaur/Ptgs2/Serpina1/Serpinb5/Serpini1/Slpi/Slpil2/Snca/Stfa2l1/Stfa3/Thbs1	18	BP
GO:0072078	nephron tubule morphogenesis	9/460	84/17859	0.000307167	0.00969578	0.00781422	Ahi1/Foxd1/Grem1/Osr1/Pgf/Shh/Tacstd2/Wnt6/Wt1	9	BP
GO:0051897	positive regulation of protein kinase B signaling	11/460	122/17859	0.00031613	0.00983856	0.0079293	C1qtnf3/Cass4/Ccl3/Cx3cr1/Fam110c/Ngfr/Nrg1/Pik3cb/Ramp3/Ret/Thbs1	11	BP
GO:0009636	response to toxic substance	19/460	301/17859	0.000318102	0.00983856	0.0079293	Alas1/Arg1/Atp7a/Ccl3/Ccl4/Cdkn1a/Cldn1/Ddit3/Fosl2/Gch1/Gstm7/Gucy2c/Kdm6b/Mt4/Ptgs2/Sesn2/Slc47a1/Slc6a4/Srxn1	19	BP
GO:0045861	negative regulation of proteolysis	22/460	376/17859	0.000319939	0.00983856	0.0079293	Adora2a/Anxa8/Bcl2l1/Birc3/Fcmr/Il10/Il1r2/Ngf/Pak2/Plaur/Ppp1r15a/Ptgs2/Serpina1/Serpinb5/Serpini1/Shh/Slpi/Slpil2/Snca/Stfa2l1/Stfa3/Thbs1	22	BP
GO:0051799	negative regulation of hair follicle development	3/460	6/17859	0.000320441	0.00983856	0.0079293	Cdh3/Fermt1/Ngfr	3	BP
GO:0001906	cell killing	16/460	230/17859	0.00032137	0.00983856	0.0079293	Arg1/Ccl11/Ccl12/Cx3cr1/Cxcl14/Cxcl2/Cxcl3/Defb14/Elane/Il23a/Itgam/Nos2/Pglyrp1/Stx11/Trem1/Trem3	16	BP
GO:0032602	chemokine production	10/460	103/17859	0.000324244	0.00986711	0.0079523	Adora2b/Apod/C1qtnf3/Elane/Il1a/Il1rl1/Mcoln2/Tlr9/Trem1/Trem3	10	BP
GO:0019730	antimicrobial humoral response	12/460	143/17859	0.000333561	0.0100902	0.00813213	Ccl11/Ccl12/Cxcl14/Cxcl2/Cxcl3/Defb14/Elane/Il36rn/Klk7/Pglyrp1/Slpi/Slpil2	12	BP
GO:0006809	nitric oxide biosynthetic process	9/460	85/17859	0.000335858	0.0100996	0.00813968	Acp5/Cx3cr1/Gla/Il10/Mmp8/Nos2/Ptgis/Ptgs2/Slc7a2	9	BP
GO:0009308	amine metabolic process	11/460	123/17859	0.000339304	0.0101432	0.00817482	Atp7a/Crhr2/Gch1/Hand2/Hdc/Itgam/Sat1/Slc1a1/Smox/Snca/Sncb	11	BP
GO:0015711	organic anion transport	22/460	378/17859	0.000344106	0.0102266	0.00824203	Adora2a/Aqp9/Arg1/Gfap/Hnf1a/Il1a/Il1rn/Kiss1r/Nos2/Pla2g2a/Sfxn2/Slc16a11/Slc16a3/Slc1a1/Slc26a9/Slc2a1/Slc32a1/Slc47a1/Slc6a13/Slc6a6/Slc7a2/Snca	22	BP
GO:0072080	nephron tubule development	10/460	104/17859	0.000350654	0.0103606	0.00835002	Ahi1/Foxd1/Grem1/Lif/Osr1/Pgf/Shh/Tacstd2/Wnt6/Wt1	10	BP
GO:0001781	neutrophil apoptotic process	4/460	14/17859	0.000354154	0.0104035	0.00838463	Cxcr2/Fcgr2b/Itgam/Pik3cb	4	BP
GO:0071675	regulation of mononuclear cell migration	11/460	124/17859	0.000363891	0.010539	0.00849378	Apod/Ccl3/Ccl4/Ccl7/Ccr1/Ccr1l1/Cx3cr1/Cxcl14/Grem1/Thbs1/Trem1	11	BP
GO:0010466	negative regulation of peptidase activity	18/460	280/17859	0.000364986	0.010539	0.00849378	Adora2a/Anxa8/Bcl2l1/Birc3/Fcmr/Ngf/Pak2/Plaur/Ptgs2/Serpina1/Serpinb5/Serpini1/Slpi/Slpil2/Snca/Stfa2l1/Stfa3/Thbs1	18	BP
GO:0034612	response to tumor necrosis factor	18/460	280/17859	0.000364986	0.010539	0.00849378	Bcl2l1/Birc3/Ccl11/Ccl12/Ccl24/Ccl3/Ccl4/Ccl7/Cldn1/Foxo3/Gch1/Ggt1/Has2/Nos2/Ptgs2/Slc2a4/Thbs1/Tnfrsf1b	18	BP
GO:0032635	interleukin-6 production	13/460	166/17859	0.000375212	0.0106959	0.00862026	Adora2b/C1qtnf3/Crhr2/Ereg/Il10/Il1a/Il1rap/Il36rn/Mmp8/Nos2/Pou2f2/Rabgef1/Tlr9	13	BP
GO:0032675	regulation of interleukin-6 production	13/460	166/17859	0.000375212	0.0106959	0.00862026	Adora2b/C1qtnf3/Crhr2/Ereg/Il10/Il1a/Il1rap/Il36rn/Mmp8/Nos2/Pou2f2/Rabgef1/Tlr9	13	BP
GO:1905039	carboxylic acid transmembrane transport	12/460	145/17859	0.000378837	0.0106959	0.00862026	Gfap/Sfxn2/Slc16a11/Slc16a3/Slc1a1/Slc22a4/Slc2a1/Slc47a1/Slc6a13/Slc6a6/Slc7a2/Thbs1	12	BP
GO:0048754	branching morphogenesis of an epithelial tube	14/460	188/17859	0.000378839	0.0106959	0.00862026	Areg/Ccl11/Esrp1/Foxd1/Gna13/Grem1/Kras/Pgf/Rdh10/Sema3e/Shh/Tacstd2/Wnt6/Wt1	14	BP
GO:0060986	endocrine hormone secretion	8/460	69/17859	0.000384849	0.0108056	0.00870863	Bmp6/C1qtnf3/Crhr2/Foxd1/Fst/Lif/Nrg1/Rab11fip1	8	BP
GO:0033135	regulation of peptidyl-serine phosphorylation	12/460	146/17859	0.000403357	0.0112014	0.00902768	Ddit4/Gadd45a/Il11/Lif/Ngf/Ntf4/Pfn2/Ppp1r15a/Ptgs2/Ramp3/Ret/Snca	12	BP
GO:1903825	organic acid transmembrane transport	12/460	146/17859	0.000403357	0.0112014	0.00902768	Gfap/Sfxn2/Slc16a11/Slc16a3/Slc1a1/Slc22a4/Slc2a1/Slc47a1/Slc6a13/Slc6a6/Slc7a2/Thbs1	12	BP
GO:0060993	kidney morphogenesis	10/460	106/17859	0.000408872	0.0112929	0.00910137	Ahi1/Foxd1/Grem1/Lif/Osr1/Pgf/Shh/Tacstd2/Wnt6/Wt1	10	BP
GO:0044706	multi-multicellular organism process	20/460	333/17859	0.00042481	0.0116696	0.00940503	Abcc8/Adra2a/Arg1/Atp7a/Cldn4/Endou/Fosl2/Il1rn/Junb/Kras/Lif/Nampt/Pgf/Ppard/Ptgis/Ptgs2/Slc2a1/Slc6a4/Sostdc1/Sts	20	BP
GO:0010565	regulation of cellular ketone metabolic process	12/460	147/17859	0.000429204	0.011727	0.00945122	Bmp6/Dgat2/Gk/Insig2/Kcnma1/Ppard/Ptgs2/Rdh10/Rest/Slc45a3/Snca/Trib3	12	BP
GO:0048247	lymphocyte chemotaxis	7/460	54/17859	0.000447052	0.0121493	0.00979162	Ccl11/Ccl12/Ccl24/Ccl3/Ccl4/Ccl7/Cxcl14	7	BP
GO:0006865	amino acid transport	13/460	170/17859	0.00047157	0.0126032	0.0101574	Adora2a/Arg1/Gfap/Il1rn/Sfxn2/Slc1a1/Slc22a4/Slc32a1/Slc47a1/Slc6a13/Slc6a6/Slc7a2/Snca	13	BP
GO:0032341	aldosterone metabolic process	4/460	15/17859	0.000473154	0.0126032	0.0101574	Bmp6/Cyp11b2/Kcnma1/Rest	4	BP
GO:0070943	neutrophil-mediated killing of symbiont cell	4/460	15/17859	0.000473154	0.0126032	0.0101574	Arg1/Elane/Trem1/Trem3	4	BP
GO:0061333	renal tubule morphogenesis	9/460	89/17859	0.000473673	0.0126032	0.0101574	Ahi1/Foxd1/Grem1/Osr1/Pgf/Shh/Tacstd2/Wnt6/Wt1	9	BP
GO:0061326	renal tubule development	10/460	109/17859	0.000511114	0.0135285	0.0109032	Ahi1/Foxd1/Grem1/Lif/Osr1/Pgf/Shh/Tacstd2/Wnt6/Wt1	10	BP
GO:0046209	nitric oxide metabolic process	9/460	90/17859	0.000514549	0.0135489	0.0109196	Acp5/Cx3cr1/Gla/Il10/Mmp8/Nos2/Ptgis/Ptgs2/Slc7a2	9	BP
GO:0051048	negative regulation of secretion	15/460	217/17859	0.000523493	0.0137134	0.0110522	Abcc8/Adra2a/Crhr2/Fgf23/Fkbp1b/Fst/Il11/Il1rn/Lif/Nrg1/Rab11fip1/Rabgef1/Rest/Snca/Tnfrsf1b	15	BP
GO:0042593	glucose homeostasis	20/460	339/17859	0.000532696	0.0138829	0.0111888	Abcc8/Adra2a/C1qtnf3/Cma1/Crhr2/Ern1/Fam3b/Fkbp1b/Foxo3/Gjb6/Gk/Hk2/Hnf1a/Ngfr/Osbp/Ppard/Pygl/Rph3al/Sesn2/Slc2a4	20	BP
GO:0001657	ureteric bud development	10/460	110/17859	0.000549572	0.0139767	0.0112644	Foxd1/Grem1/Osr1/Pgf/Ret/Shh/Sim1/Tacstd2/Wnt6/Wt1	10	BP
GO:0033138	positive regulation of peptidyl-serine phosphorylation	10/460	110/17859	0.000549572	0.0139767	0.0112644	Il11/Lif/Ngf/Ntf4/Pfn2/Ppp1r15a/Ptgs2/Ramp3/Ret/Snca	10	BP
GO:0033239	negative regulation of cellular amine metabolic process	3/460	7/17859	0.000550048	0.0139767	0.0112644	Atp7a/Itgam/Snca	3	BP
GO:0070945	neutrophil-mediated killing of gram-negative bacterium	3/460	7/17859	0.000550048	0.0139767	0.0112644	Elane/Trem1/Trem3	3	BP
GO:0071284	cellular response to lead ion	3/460	7/17859	0.000550048	0.0139767	0.0112644	Atp7a/Cldn1/Ptgs2	3	BP
GO:0033500	carbohydrate homeostasis	20/460	340/17859	0.000552815	0.0139771	0.0112647	Abcc8/Adra2a/C1qtnf3/Cma1/Crhr2/Ern1/Fam3b/Fkbp1b/Foxo3/Gjb6/Gk/Hk2/Hnf1a/Ngfr/Osbp/Ppard/Pygl/Rph3al/Sesn2/Slc2a4	20	BP
GO:0043154	negative regulation of cysteine-type endopeptidase activity involved in apoptotic process	9/460	91/17859	0.000558273	0.0140294	0.0113069	Adora2a/Bcl2l1/Birc3/Fcmr/Pak2/Plaur/Ptgs2/Snca/Thbs1	9	BP
GO:0031424	keratinization	5/460	27/17859	0.000560405	0.0140294	0.0113069	Cdh3/Il1a/Krt17/Tgm1/Tgm3	5	BP
GO:0072163	mesonephric epithelium development	10/460	111/17859	0.000590396	0.0146361	0.0117958	Foxd1/Grem1/Osr1/Pgf/Ret/Shh/Sim1/Tacstd2/Wnt6/Wt1	10	BP
GO:0072164	mesonephric tubule development	10/460	111/17859	0.000590396	0.0146361	0.0117958	Foxd1/Grem1/Osr1/Pgf/Ret/Shh/Sim1/Tacstd2/Wnt6/Wt1	10	BP
GO:2001057	reactive nitrogen species metabolic process	9/460	92/17859	0.000604996	0.0148333	0.0119548	Acp5/Cx3cr1/Gla/Il10/Mmp8/Nos2/Ptgis/Ptgs2/Slc7a2	9	BP
GO:0016052	carbohydrate catabolic process	12/460	153/17859	0.00061545	0.0148333	0.0119548	Aldoc/Aoah/Ddit4/Eno2/Gk/Hk2/Ier3/Pfkfb3/Ppp1r3b/Ppp1r3d/Pygl/Tpi1	12	BP
GO:0071496	cellular response to external stimulus	23/460	421/17859	0.00061593	0.0148333	0.0119548	Adamts1/Adora2b/Atf3/Bmp6/Bnip3/Cdkn1a/Cyp11b2/Fgf23/Foxo3/Gadd45a/Il1rl1/Kcnj2/Ltbp1/Mag/Max/Nampt/Nos2/Pmaip1/Ppp1r15a/Ptgs2/Sesn2/Slc2a1/Trem1	23	BP
GO:0043922	negative regulation by host of viral transcription	4/460	16/17859	0.000618102	0.0148333	0.0119548	Ccl3/Ccl4/Pou2f3/Rest	4	BP
GO:0072074	kidney mesenchyme development	4/460	16/17859	0.000618102	0.0148333	0.0119548	Foxd1/Osr1/Shh/Wt1	4	BP
GO:1902043	positive regulation of extrinsic apoptotic signaling pathway via death domain receptors	4/460	16/17859	0.000618102	0.0148333	0.0119548	Atf3/Mal/Pmaip1/Thbs1	4	BP
GO:0002526	acute inflammatory response	11/460	132/17859	0.000619984	0.0148333	0.0119548	Adra2a/Cxcr2/Elane/Fcgr2b/Il1a/Il1rn/Nlrp3/Plscr1/Ptgs2/Serpina1/Trem1	11	BP
GO:0045103	intermediate filament-based process	7/460	57/17859	0.000624621	0.0148333	0.0119548	Gfap/Kb23/Krt17/Krt25/Krt71/Prph/Shh	7	BP
GO:0061098	positive regulation of protein tyrosine kinase activity	7/460	57/17859	0.000624621	0.0148333	0.0119548	Adra2a/Areg/Cass4/Ereg/Grem1/Nrg1/Pak2	7	BP
GO:0051924	regulation of calcium ion transport	18/460	294/17859	0.000649731	0.0153578	0.0123775	Adora2a/Adra2a/Atp2b2/Ccl3/Ccl4/Ccr1/Crhr2/Fkbp1b/Gstm7/Ngf/Plp1/Ptgs2/Ramp3/Rrad/Saraf/Snca/Tlr9/Tmem38b	18	BP
GO:0048469	cell maturation	15/460	222/17859	0.000663257	0.0155709	0.0125492	Bcl11a/Cdkn1a/Ereg/Foxo3/Gldn/Kcnma1/Lgi4/Ngf/Plp1/Pou2f2/Ret/Rnd1/Runx3/Sox10/Tfcp2l1	15	BP
GO:0045109	intermediate filament organization	5/460	28/17859	0.000667935	0.0155709	0.0125492	Gfap/Krt17/Krt25/Krt71/Shh	5	BP
GO:0045662	negative regulation of myoblast differentiation	5/460	28/17859	0.000667935	0.0155709	0.0125492	Cmtm5/Cxcl14/Ddit3/Ppard/Sostdc1	5	BP
GO:0072210	metanephric nephron development	6/460	42/17859	0.000675275	0.0156701	0.0126292	Foxd1/Grem1/Lif/Osr1/Ret/Wt1	6	BP
GO:0072171	mesonephric tubule morphogenesis	8/460	75/17859	0.000679022	0.0156854	0.0126415	Foxd1/Grem1/Osr1/Pgf/Shh/Tacstd2/Wnt6/Wt1	8	BP
GO:0007272	ensheathment of neurons	13/460	177/17859	0.000690757	0.0158127	0.0127441	Cldn11/Lgi4/Mag/Mal/Mpz/Ncmap/Ngfr/Nrg1/Plp1/Ppard/Prx/Sox10/Tnfrsf1b	13	BP
GO:0008366	axon ensheathment	13/460	177/17859	0.000690757	0.0158127	0.0127441	Cldn11/Lgi4/Mag/Mal/Mpz/Ncmap/Ngfr/Nrg1/Plp1/Ppard/Prx/Sox10/Tnfrsf1b	13	BP
GO:0015908	fatty acid transport	9/460	94/17859	0.000708051	0.0161359	0.0130046	Hnf1a/Il1a/Kiss1r/Pla2g2a/Plin2/Ppard/Slc27a6/Slc2a1/Thbs1	9	BP
GO:1901216	positive regulation of neuron death	11/460	135/17859	0.000748444	0.0169803	0.0136851	Ccl3/Ddit3/Ddit4/Fcgr2b/Foxo3/Itgam/Kcnma1/Ngfr/Pmaip1/Rest/Snca	11	BP
GO:0045860	positive regulation of protein kinase activity	22/460	401/17859	0.000760208	0.0171706	0.0138385	Adra2a/Areg/Cass4/Ccnt1/Cdkn1a/Ereg/Ern1/Gprc5d/Grem1/Il1rn/Il23a/Kras/Mmd2/Ngf/Nrg1/Pak2/Pdgfc/Slc1a1/Snca/Spdya/Thbs1/Tlr9	22	BP
GO:0002446	neutrophil mediated immunity	6/460	43/17859	0.000767952	0.0171897	0.0138539	Arg1/Elane/Itgam/Stx11/Trem1/Trem3	6	BP
GO:0044275	cellular carbohydrate catabolic process	6/460	43/17859	0.000767952	0.0171897	0.0138539	Aoah/Gk/Ppp1r3b/Ppp1r3d/Pygl/Tpi1	6	BP
GO:0051353	positive regulation of oxidoreductase activity	7/460	59/17859	0.000771204	0.0171897	0.0138539	Atp7a/Cdh3/Fgf23/Gch1/Kras/Pik3cb/Snca	7	BP
GO:0001823	mesonephros development	10/460	115/17859	0.000779602	0.0172731	0.0139211	Foxd1/Grem1/Osr1/Pgf/Ret/Shh/Sim1/Tacstd2/Wnt6/Wt1	10	BP
GO:0042634	regulation of hair cycle	5/460	29/17859	0.000790187	0.0172731	0.0139211	Cdh3/Fermt1/Fst/Krt17/Ngfr	5	BP
GO:0070168	negative regulation of biomineral tissue development	5/460	29/17859	0.000790187	0.0172731	0.0139211	Ccl3/Ccr1/Fgf23/Grem1/Srgn	5	BP
GO:0008212	mineralocorticoid metabolic process	4/460	17/17859	0.00079194	0.0172731	0.0139211	Bmp6/Cyp11b2/Kcnma1/Rest	4	BP
GO:0070942	neutrophil mediated cytotoxicity	4/460	17/17859	0.00079194	0.0172731	0.0139211	Arg1/Elane/Trem1/Trem3	4	BP
GO:1903036	positive regulation of response to wounding	8/460	77/17859	0.000809904	0.0175894	0.014176	Adra2a/Atp7a/Cldn1/Cldn4/Fermt1/Fkbp1b/Nrg1/Thbs1	8	BP
GO:0006109	regulation of carbohydrate metabolic process	14/460	204/17859	0.000853133	0.0183906	0.0148217	Adora2b/C1qtnf3/Ddit4/Dgat2/Has2/Ier3/Pfkfb3/Plek/Pmaip1/Ppp1r3b/Ppp1r3d/Sesn2/Slc45a3/Snca	14	BP
GO:2001238	positive regulation of extrinsic apoptotic signaling pathway	7/460	60/17859	0.000854031	0.0183906	0.0148217	Atf3/Mal/Pak2/Pmaip1/Ret/Runx3/Thbs1	7	BP
GO:0060613	fat pad development	3/460	8/17859	0.000863269	0.0185111	0.0149188	Arid5b/Arrdc3/Dgat2	3	BP
GO:0001774	microglial cell activation	6/460	44/17859	0.000870151	0.0185803	0.0149746	Cx3cr1/Itgam/Mmp8/Nampt/Snca/Tlr9	6	BP
GO:0051873	killing by host of symbiont cells	5/460	30/17859	0.000928379	0.0196584	0.0158435	Arg1/Defb14/Elane/Trem1/Trem3	5	BP
GO:0110150	negative regulation of biomineralization	5/460	30/17859	0.000928379	0.0196584	0.0158435	Ccl3/Ccr1/Fgf23/Grem1/Srgn	5	BP
GO:0031641	regulation of myelination	7/460	61/17859	0.000943718	0.0199003	0.0160385	Lgi4/Mag/Ncmap/Ngfr/Nrg1/Sox10/Tnfrsf1b	7	BP
GO:0042180	cellular ketone metabolic process	15/460	230/17859	0.000952592	0.0200044	0.0161224	Bmp6/Cyp11b2/Cyp4f18/Dgat2/Gk/Insig2/Kcnma1/Ppard/Ptgs2/Rdh10/Rest/Slc45a3/Snca/Tpi1/Trib3	15	BP
GO:0001938	positive regulation of endothelial cell proliferation	9/460	98/17859	0.000957191	0.0200183	0.0161336	Adora2b/Arg1/Bmp6/Ccl11/Ccl24/Il10/Pgf/Plxnb3/Thbs4	9	BP
GO:0050730	regulation of peptidyl-tyrosine phosphorylation	17/460	280/17859	0.000997009	0.0206938	0.016678	Adra2a/Areg/Bmp6/Cass4/Clcf1/Ereg/Grem1/Il11/Il23a/Lif/Nrg1/Osbp/Pak2/Pdgfc/Samsn1/Sema4d/Thbs4	17	BP
GO:0060572	morphogenesis of an epithelial bud	4/460	18/17859	0.000997634	0.0206938	0.016678	Pthlh/Rdh10/Shh/Sostdc1	4	BP
GO:0001656	metanephros development	9/460	99/17859	0.00102945	0.0211809	0.0170705	Cxcr2/Foxd1/Grem1/Lif/Osr1/Rdh10/Ret/Shh/Wt1	9	BP
GO:2000117	negative regulation of cysteine-type endopeptidase activity	9/460	99/17859	0.00102945	0.0211809	0.0170705	Adora2a/Bcl2l1/Birc3/Fcmr/Pak2/Plaur/Ptgs2/Snca/Thbs1	9	BP
GO:0051883	killing of cells in other organism involved in symbiotic interaction	5/460	31/17859	0.00108376	0.0221192	0.0178268	Arg1/Defb14/Elane/Trem1/Trem3	5	BP
GO:0071305	cellular response to vitamin D	5/460	31/17859	0.00108376	0.0221192	0.0178268	Adamts1/Fgf23/Ltbp1/Nos2/Trem1	5	BP
GO:0048660	regulation of smooth muscle cell proliferation	13/460	186/17859	0.00109334	0.0222254	0.0179123	Adamts1/Apod/Cdkn1a/Elane/Ereg/Ern1/Gna13/Il10/Nampt/Ppard/Ptgs2/Thbs1/Trib1	13	BP
GO:0042417	dopamine metabolic process	6/460	46/17859	0.0011057	0.0223058	0.0179771	Atp7a/Gch1/Itgam/Slc1a1/Snca/Sncb	6	BP
GO:0051341	regulation of oxidoreductase activity	9/460	100/17859	0.00110607	0.0223058	0.0179771	Atp7a/Cdh3/Fgf23/Gch1/Gla/Il1a/Kras/Pik3cb/Snca	9	BP
GO:2000379	positive regulation of reactive oxygen species metabolic process	8/460	81/17859	0.00113231	0.0226759	0.0182754	Cdkn1a/Foxo3/Gadd45a/Itgam/Mmp8/Olr1/Snca/Thbs1	8	BP
GO:0097191	extrinsic apoptotic signaling pathway	15/460	234/17859	0.00113335	0.0226759	0.0182754	Atf3/Bcl2l1/Cx3cr1/Fcmr/Foxo3/Il1a/Mal/Ngf/Nrg1/Pak2/Pmaip1/Ret/Runx3/Thbs1/Tnfrsf1b	15	BP
GO:0045445	myoblast differentiation	9/460	101/17859	0.00118724	0.0236609	0.0190693	Cmtm5/Cxcl14/Ddit3/Grem1/Nrg1/Ppard/Rest/Shh/Sostdc1	9	BP
GO:0006919	activation of cysteine-type endopeptidase activity involved in apoptotic process	8/460	82/17859	0.00122706	0.0242012	0.0195048	Egln3/Ngf/Ngfr/Nlrp3/Pmaip1/Ret/Slc1a1/Snca	8	BP
GO:0014015	positive regulation of gliogenesis	8/460	82/17859	0.00122706	0.0242012	0.0195048	Clcf1/Gfap/Lif/Mag/Nrg1/Shh/Sox10/Tnfrsf1b	8	BP
GO:0045019	negative regulation of nitric oxide biosynthetic process	4/460	19/17859	0.00123816	0.0242012	0.0195048	Acp5/Gla/Il10/Ptgis	4	BP
GO:0140131	positive regulation of lymphocyte chemotaxis	4/460	19/17859	0.00123816	0.0242012	0.0195048	Ccl3/Ccl4/Ccl7/Cxcl14	4	BP
GO:1904406	negative regulation of nitric oxide metabolic process	4/460	19/17859	0.00123816	0.0242012	0.0195048	Acp5/Gla/Il10/Ptgis	4	BP
GO:0001963	synaptic transmission, dopaminergic	5/460	32/17859	0.00125761	0.0243997	0.0196647	Adora2a/Nat8l/Ptgs2/Slc6a4/Snca	5	BP
GO:0006081	cellular aldehyde metabolic process	7/460	64/17859	0.00125791	0.0243997	0.0196647	Bmp6/Cyp11b2/Kcnma1/Kdm3a/Rdh10/Rest/Tpi1	7	BP
GO:0032344	regulation of aldosterone metabolic process	3/460	9/17859	0.00127021	0.0244077	0.0196711	Bmp6/Kcnma1/Rest	3	BP
GO:0044848	biological phase	3/460	9/17859	0.00127021	0.0244077	0.0196711	Cdh3/Fermt1/Sycp2	3	BP
GO:0070167	regulation of biomineral tissue development	9/460	102/17859	0.00127314	0.0244077	0.0196711	Bmp6/Ccl3/Ccr1/Fgf23/Grem1/Osr1/Sgms2/Srgn/Wnt6	9	BP
GO:0007159	leukocyte cell-cell adhesion	20/460	364/17859	0.00127754	0.0244077	0.0196711	Add2/Adora2a/Arg1/Cd274/Cx3cr1/Elane/Has2/Il1a/Il23a/Itgam/Lgals7/Nlrp3/Olr1/Pag1/Runx3/Sele/Selp/Sema4d/Shh/Thbs1	20	BP
GO:0051235	maintenance of location	19/460	338/17859	0.00128717	0.0244996	0.0197452	Ccl3/Ddit3/Dgat2/Ero1a/Fkbp1b/Fth1/Gstm7/Hk2/Igsf11/Insig2/Ltbp1/Mcoln2/Ngf/Plin2/Ppard/Snca/Soat1/Srgn/Tmem38b	19	BP
GO:0048678	response to axon injury	10/460	123/17859	0.00130834	0.0248097	0.0199951	Apod/Arg1/Bnip3/Fkbp1b/Mag/Matn4/Max/Nrg1/Shh/Slc1a1	10	BP
GO:0030500	regulation of bone mineralization	8/460	83/17859	0.00132802	0.0250893	0.0202204	Bmp6/Ccl3/Ccr1/Fgf23/Grem1/Osr1/Sgms2/Srgn	8	BP
GO:0010288	response to lead ion	6/460	48/17859	0.00138727	0.0261114	0.0210443	Atp7a/Bcl2l1/Cldn1/Plscr1/Ptgs2/Serpina1	6	BP
GO:0060562	epithelial tube morphogenesis	21/460	394/17859	0.0014235	0.0266946	0.0215143	Ahi1/Areg/Ccl11/Cxcr2/Esrp1/Foxd1/Gna13/Grem1/Hand2/Kras/Osr1/Pgf/Pthlh/Rdh10/Ret/Sema3e/Shh/Sostdc1/Tacstd2/Wnt6/Wt1	21	BP
GO:0110149	regulation of biomineralization	9/460	104/17859	0.00146	0.0272783	0.0219847	Bmp6/Ccl3/Ccr1/Fgf23/Grem1/Osr1/Sgms2/Srgn/Wnt6	9	BP
GO:0072009	nephron epithelium development	10/460	125/17859	0.00147825	0.0275182	0.022178	Ahi1/Foxd1/Grem1/Lif/Osr1/Pgf/Shh/Tacstd2/Wnt6/Wt1	10	BP
GO:0001658	branching involved in ureteric bud morphogenesis	7/460	66/17859	0.00150914	0.0278731	0.0224641	Foxd1/Grem1/Pgf/Shh/Tacstd2/Wnt6/Wt1	7	BP
GO:0070059	intrinsic apoptotic signaling pathway in response to endoplasmic reticulum stress	7/460	66/17859	0.00150914	0.0278731	0.0224641	Bcl2l1/Ddit3/Ern1/Ero1a/Ngf/Pmaip1/Trib3	7	BP
GO:0060231	mesenchymal to epithelial transition	4/460	20/17859	0.00151648	0.0278731	0.0224641	Grem1/H19/Lif/Wt1	4	BP
GO:0048863	stem cell differentiation	15/460	241/17859	0.00151926	0.0278731	0.0224641	Ggt1/Grem1/Hand2/Kdm3a/Lif/Nrg1/Osr1/Rdh10/Rest/Ret/Sema3e/Sema4d/Shh/Sox10/Tacstd2	15	BP
GO:0061844	antimicrobial humoral immune response mediated by antimicrobial peptide	9/460	105/17859	0.00156136	0.0285425	0.0230035	Ccl11/Ccl12/Cxcl14/Cxcl2/Cxcl3/Defb14/Elane/Klk7/Pglyrp1	9	BP
GO:0048659	smooth muscle cell proliferation	13/460	194/17859	0.00160034	0.0291503	0.0234934	Adamts1/Apod/Cdkn1a/Elane/Ereg/Ern1/Gna13/Il10/Nampt/Ppard/Ptgs2/Thbs1/Trib1	13	BP
GO:0048771	tissue remodeling	14/460	218/17859	0.00160958	0.0292138	0.0235446	Acp5/Arg1/Atp7a/Clec10a/Dlk1/Grem1/Hand2/Hnf1a/Il1a/Il23a/LOC24906/Lif/Nos2/Thbs4	14	BP
GO:0010675	regulation of cellular carbohydrate metabolic process	12/460	171/17859	0.00162137	0.0293231	0.0236327	Adora2b/C1qtnf3/Ddit4/Dgat2/Ier3/Plek/Pmaip1/Ppp1r3b/Ppp1r3d/Sesn2/Slc45a3/Snca	12	BP
GO:0014013	regulation of gliogenesis	10/460	127/17859	0.00166566	0.0300174	0.0241922	Abcc8/Clcf1/Gfap/Gpr37l1/Lif/Mag/Nrg1/Shh/Sox10/Tnfrsf1b	10	BP
GO:0061756	leukocyte adhesion to vascular endothelial cell	6/460	50/17859	0.00172045	0.0308951	0.0248996	Add2/Cx3cr1/Elane/Itgam/Sele/Selp	6	BP
GO:0010624	regulation of Schwann cell proliferation	3/460	10/17859	0.00178001	0.0316295	0.0254915	Gfap/Nrg1/Sox10	3	BP
GO:0035581	sequestering of extracellular ligand from receptor	3/460	10/17859	0.00178001	0.0316295	0.0254915	Grem1/Grem2/Ltbp1	3	BP
GO:0072203	cell proliferation involved in metanephros development	3/460	10/17859	0.00178001	0.0316295	0.0254915	Osr1/Shh/Wt1	3	BP
GO:0044247	cellular polysaccharide catabolic process	4/460	21/17859	0.00183555	0.0325026	0.0261952	Aoah/Ppp1r3b/Ppp1r3d/Pygl	4	BP
GO:0032755	positive regulation of interleukin-6 production	9/460	108/17859	0.00189975	0.0333246	0.0268577	Adora2b/Crhr2/Ereg/Il1a/Il1rap/Mmp8/Nos2/Pou2f2/Tlr9	9	BP
GO:0046697	decidualization	5/460	35/17859	0.00190304	0.0333246	0.0268577	Junb/Lif/Ppard/Ptgis/Ptgs2	5	BP
GO:0050901	leukocyte tethering or rolling	5/460	35/17859	0.00190304	0.0333246	0.0268577	Add2/Cx3cr1/Elane/Sele/Selp	5	BP
GO:0045104	intermediate filament cytoskeleton organization	6/460	51/17859	0.0019082	0.0333246	0.0268577	Gfap/Krt17/Krt25/Krt71/Prph/Shh	6	BP
GO:0003018	vascular process in circulatory system	15/460	247/17859	0.00193246	0.0336327	0.0271059	Abcc8/Adora2a/Adora2b/Adra2a/Bmp6/Ccl4/Cxcr2/Gch1/Kcnma1/Olr1/Ppard/Ptgis/Ptgs2/Slc2a1/Slc6a4	15	BP
GO:0006801	superoxide metabolic process	7/460	69/17859	0.00195736	0.0337197	0.0271761	Acp5/Atp7a/Gch1/Itgam/Nos2/Olr1/Slc1a1	7	BP
GO:0042311	vasodilation	7/460	69/17859	0.00195736	0.0337197	0.0271761	Adora2a/Adora2b/Adra2a/Gch1/Kcnma1/Ppard/Ptgis	7	BP
GO:0046579	positive regulation of Ras protein signal transduction	7/460	69/17859	0.00195736	0.0337197	0.0271761	F2rl2/Kras/Mmd2/Ngf/Ngfr/Nrg1/Pik3cb	7	BP
GO:0001649	osteoblast differentiation	14/460	223/17859	0.00198878	0.0341451	0.0275189	Areg/Bmp6/Ccl3/Dlk1/Fgf23/Fndc3b/Grem1/Hand2/Junb/Pthlh/Rest/Satb2/Sema4d/Shh	14	BP
GO:1900542	regulation of purine nucleotide metabolic process	8/460	89/17859	0.00208066	0.0355136	0.0286218	Adora2b/Ak4/Bcl2l1/Ddit4/Ier3/Nos2/Pfkfb3/Snca	8	BP
GO:0042742	defense response to bacterium	17/460	300/17859	0.00208822	0.0355136	0.0286218	Acp5/Clec4d/Defb14/Elane/Il10/Il23a/Klk7/Nlrp3/Nos2/Pglyrp1/Pla2g2a/Slamf9/Slpi/Slpil2/Tlr9/Trem1/Trem3	17	BP
GO:0071248	cellular response to metal ion	15/460	249/17859	0.00208945	0.0355136	0.0286218	Atp7a/Bmp6/Bnip3/Cldn1/Cpne5/Ddit3/Ern1/Junb/Mt4/Nos2/Ptgs2/Shh/Slc1a1/Snca/Tlr9	15	BP
GO:0035821	modulation of process of other organism	9/460	110/17859	0.00215617	0.0365256	0.0294374	Arg1/Ccl12/Ccl3/Ccl4/Cx3cr1/Nos2/Pou2f3/Rest/Slpi	9	BP
GO:0042542	response to hydrogen peroxide	13/460	201/17859	0.00219101	0.0368701	0.0297151	Areg/Arg1/Bcl2l1/Bnip3/Ddit3/Ern1/Fkbp1b/Foxo3/Gja3/Gpr37l1/Il10/Kdm6b/Olr1	13	BP
GO:0000272	polysaccharide catabolic process	4/460	22/17859	0.00219828	0.0368701	0.0297151	Aoah/Ppp1r3b/Ppp1r3d/Pygl	4	BP
GO:0032693	negative regulation of interleukin-10 production	4/460	22/17859	0.00219828	0.0368701	0.0297151	Cd274/Fcgr2b/Il23a/Mmp8	4	BP
GO:0006140	regulation of nucleotide metabolic process	8/460	90/17859	0.00223345	0.0373369	0.0300913	Adora2b/Ak4/Bcl2l1/Ddit4/Ier3/Nos2/Pfkfb3/Snca	8	BP
GO:0051896	regulation of protein kinase B signaling	12/460	178/17859	0.00227068	0.0378348	0.0304926	C1qtnf3/Cass4/Ccl3/Cx3cr1/Ddit3/Fam110c/Ngfr/Nrg1/Pik3cb/Ramp3/Ret/Thbs1	12	BP
GO:0030216	keratinocyte differentiation	9/460	111/17859	0.00229433	0.0379797	0.0306094	Cdh3/Dsg4/Flnb/Fosl2/Il1a/Krt17/Pou2f3/Tgm1/Tgm3	9	BP
GO:0050886	endocrine process	9/460	111/17859	0.00229433	0.0379797	0.0306094	Bmp6/C1qtnf3/Crhr2/Foxd1/Fst/Kras/Lif/Nrg1/Rab11fip1	9	BP
GO:0071677	positive regulation of mononuclear cell migration	7/460	71/17859	0.00230913	0.0381007	0.0307069	Ccl3/Ccl4/Ccl7/Ccr1/Ccr1l1/Cx3cr1/Cxcl14	7	BP
GO:0061448	connective tissue development	17/460	303/17859	0.00231667	0.0381014	0.0307074	Arid5b/Arrdc3/Atp7a/Bmp6/Dgat2/Efemp1/Foxd1/Grem1/Hand2/Osr1/Ppard/Pthlh/Runx3/Satb2/Thbs1/Wnt5b/Wt1	17	BP
GO:0010976	positive regulation of neuron projection development	14/460	227/17859	0.00234298	0.0382417	0.0308205	Adamts1/Ahi1/Bcl11a/Cux2/Enc1/Fkbp1b/Il1rap/Lif/Ngf/Ngfr/Nrg1/Plxnb3/Ret/Serpini1	14	BP
GO:0071356	cellular response to tumor necrosis factor	15/460	252/17859	0.00234472	0.0382417	0.0308205	Bcl2l1/Birc3/Ccl11/Ccl12/Ccl24/Ccl3/Ccl4/Ccl7/Cldn1/Foxo3/Has2/Nos2/Slc2a4/Thbs1/Tnfrsf1b	15	BP
GO:0002676	regulation of chronic inflammatory response	3/460	11/17859	0.00240096	0.0382417	0.0308205	Adora2b/Cx3cr1/Il10	3	BP
GO:0006527	arginine catabolic process	3/460	11/17859	0.00240096	0.0382417	0.0308205	Arg1/Nos2/Padi3	3	BP
GO:0018401	peptidyl-proline hydroxylation to 4-hydroxy-L-proline	3/460	11/17859	0.00240096	0.0382417	0.0308205	Egln3/Ero1a/P4ha1	3	BP
GO:0033029	regulation of neutrophil apoptotic process	3/460	11/17859	0.00240096	0.0382417	0.0308205	Cxcr2/Fcgr2b/Pik3cb	3	BP
GO:0060379	cardiac muscle cell myoblast differentiation	3/460	11/17859	0.00240096	0.0382417	0.0308205	Grem1/Nrg1/Rest	3	BP
GO:0070493	thrombin-activated receptor signaling pathway	3/460	11/17859	0.00240096	0.0382417	0.0308205	F2rl2/Plek/Snca	3	BP
GO:1900115	extracellular regulation of signal transduction	3/460	11/17859	0.00240096	0.0382417	0.0308205	Grem1/Grem2/Ltbp1	3	BP
GO:1900116	extracellular negative regulation of signal transduction	3/460	11/17859	0.00240096	0.0382417	0.0308205	Grem1/Grem2/Ltbp1	3	BP
GO:2001235	positive regulation of apoptotic signaling pathway	11/460	156/17859	0.00240798	0.0382417	0.0308205	Adora2a/Atf3/Ddit3/Mal/Ngfr/Pak2/Plscr1/Pmaip1/Ret/Runx3/Thbs1	11	BP
GO:0006986	response to unfolded protein	9/460	112/17859	0.00243943	0.0384271	0.03097	Abcb10/Atf3/Ddit3/Ern1/Ero1a/Hspa4l/Ppp1r15a/Rhbdd1/Thbs4	9	BP
GO:0010042	response to manganese ion	5/460	37/17859	0.0024499	0.0384271	0.03097	Arg1/Atp7a/Ddit3/Ern1/Ptgs2	5	BP
GO:0030728	ovulation	5/460	37/17859	0.0024499	0.0384271	0.03097	Adamts1/Ereg/Foxo3/Ptgs2/Tnfaip6	5	BP
GO:1901020	negative regulation of calcium ion transmembrane transporter activity	5/460	37/17859	0.0024499	0.0384271	0.03097	Adra2a/Fkbp1b/Gstm7/Rrad/Tlr9	5	BP
GO:0071260	cellular response to mechanical stimulus	10/460	134/17859	0.0024786	0.0387577	0.0312364	Bmp6/Bnip3/Cyp11b2/Gadd45a/Il1rl1/Kcnj2/Ltbp1/Mag/Ptgs2/Slc2a1	10	BP
GO:0007204	positive regulation of cytosolic calcium ion concentration	19/460	359/17859	0.00254972	0.0397474	0.0320341	Ccl3/Ccr1/Ccr1l1/Cx3cr1/Cxcl2/Cxcl3/Cxcr2/Ddit3/Ero1a/F2rl2/Fkbp1b/Fpr1/Gna13/Gstm7/Mcoln2/Ngf/Ramp3/Snca/Tmem38b	19	BP
GO:0097193	intrinsic apoptotic signaling pathway	17/460	306/17859	0.00256565	0.0398735	0.0321357	Bcl2l1/Bnip3/Cdkn1a/Ddit3/Ddit4/Ern1/Ero1a/Ier3/Ngf/Perp/Pik3cb/Plaur/Plscr1/Pmaip1/Ptgs2/Tnfrsf1b/Trib3	17	BP
GO:0045986	negative regulation of smooth muscle contraction	4/460	23/17859	0.00260754	0.0401562	0.0323635	Adora2b/Adra2a/Kcnma1/Ptgs2	4	BP
GO:0071605	monocyte chemotactic protein-1 production	4/460	23/17859	0.00260754	0.0401562	0.0323635	Apod/C1qtnf3/Il1a/Mcoln2	4	BP
GO:0071637	regulation of monocyte chemotactic protein-1 production	4/460	23/17859	0.00260754	0.0401562	0.0323635	Apod/C1qtnf3/Il1a/Mcoln2	4	BP
GO:0022604	regulation of cell morphogenesis	18/460	334/17859	0.00269915	0.0411682	0.0331791	Bcl11a/Cass4/Ccl11/Ccl12/Ccl24/Ccl3/Ccl7/Cldn4/Cpne5/Cux2/Gna13/Has2/Olfm4/Plxnb3/Rnd1/Sema3e/Sema4d/Tacstd2	18	BP
GO:0043270	positive regulation of ion transport	18/460	334/17859	0.00269915	0.0411682	0.0331791	Abcc8/Adora2a/Adra2a/Atp2b2/Atp7a/Ccl3/Ccl4/Ccr1/Crhr2/Gstm7/Il1a/Kcnj2/Nat8l/Plp1/Prss8/Ramp3/Slc6a4/Snca	18	BP
GO:0045428	regulation of nitric oxide biosynthetic process	7/460	73/17859	0.00270773	0.0411682	0.0331791	Acp5/Cx3cr1/Gla/Il10/Mmp8/Ptgis/Ptgs2	7	BP
GO:0033273	response to vitamin	12/460	182/17859	0.00272822	0.0411682	0.0331791	Acp5/Adamts1/Arg1/Fgf23/Fkbp1b/Il1a/Ltbp1/Nos2/Ppard/Ptgs2/Trem1/Tshb	12	BP
GO:0071706	tumor necrosis factor superfamily cytokine production	12/460	182/17859	0.00272822	0.0411682	0.0331791	Abcc8/Acp5/Ccl3/Ccl4/Cd274/Cx3cr1/Il10/Il1a/Il23a/Mmp8/Thbs1/Tlr9	12	BP
GO:1903555	regulation of tumor necrosis factor superfamily cytokine production	12/460	182/17859	0.00272822	0.0411682	0.0331791	Abcc8/Acp5/Ccl3/Ccl4/Cd274/Cx3cr1/Il10/Il1a/Il23a/Mmp8/Thbs1/Tlr9	12	BP
GO:1901617	organic hydroxy compound biosynthetic process	14/460	231/17859	0.00274772	0.0411682	0.0331791	Atp7a/Bmp6/Cdh3/Crhr2/Cyp11b2/Gch1/Hand2/Hdc/Hnf1a/Insig2/Ldhc/Plek/Rest/Snca	14	BP
GO:0045639	positive regulation of myeloid cell differentiation	9/460	114/17859	0.00275146	0.0411682	0.0331791	Abcb10/Ccl3/Ccr1/Foxo3/Il23a/Itgam/Lif/Mturn/Trib1	9	BP
GO:0001953	negative regulation of cell-matrix adhesion	5/460	38/17859	0.00276237	0.0411682	0.0331791	Ajap1/Apod/Plet1/Sema3e/Thbs1	5	BP
GO:0010939	regulation of necrotic cell death	5/460	38/17859	0.00276237	0.0411682	0.0331791	Birc3/Bnip3/Fth1/Slc6a13/Slc6a6	5	BP
GO:0050999	regulation of nitric-oxide synthase activity	5/460	38/17859	0.00276237	0.0411682	0.0331791	Gch1/Gla/Il1a/Kras/Pik3cb	5	BP
GO:0044403	biological process involved in symbiotic interaction	15/460	257/17859	0.00282742	0.0420145	0.0338612	Arg1/Ccl12/Ccl3/Ccl4/Cldn1/Cx3cr1/Defb14/Elane/Pglyrp1/Plscr1/Pou2f3/Rest/Tmprss2/Trem1/Trem3	15	BP
GO:0046939	nucleotide phosphorylation	9/460	115/17859	0.00291888	0.043207	0.0348223	Ak4/Aldoc/Dck/Ddit4/Eno2/Hk2/Ier3/Pfkfb3/Tpi1	9	BP
GO:0060675	ureteric bud morphogenesis	7/460	74/17859	0.00292582	0.043207	0.0348223	Foxd1/Grem1/Pgf/Shh/Tacstd2/Wnt6/Wt1	7	BP
GO:0031669	cellular response to nutrient levels	15/460	258/17859	0.00293318	0.043207	0.0348223	Adamts1/Atf3/Cdkn1a/Cyp11b2/Fgf23/Foxo3/Ltbp1/Max/Nampt/Nos2/Pmaip1/Ppp1r15a/Sesn2/Slc2a1/Trem1	15	BP
GO:0070498	interleukin-1-mediated signaling pathway	4/460	24/17859	0.00306617	0.0450354	0.0362959	Il1a/Il1r2/Il1rn/Irak2	4	BP
GO:0031646	positive regulation of nervous system process	6/460	56/17859	0.00308878	0.0452368	0.0364582	Mag/Ncmap/Ngfr/Nrg1/Sox10/Tnfrsf1b	6	BP
GO:0006869	lipid transport	20/460	393/17859	0.00311714	0.0453404	0.0365416	Ano4/Apod/Aqp9/Bmp6/Hnf1a/Il1a/Kiss1r/Lipg/Nos2/Nrg1/Osbp/Pla2g2a/Plin2/Plscr1/Ppard/Shh/Slc27a6/Slc2a1/Soat1/Thbs1	20	BP
GO:0032342	aldosterone biosynthetic process	3/460	12/17859	0.00314046	0.0453404	0.0365416	Bmp6/Cyp11b2/Rest	3	BP
GO:0070944	neutrophil-mediated killing of bacterium	3/460	12/17859	0.00314046	0.0453404	0.0365416	Elane/Trem1/Trem3	3	BP
GO:0072075	metanephric mesenchyme development	3/460	12/17859	0.00314046	0.0453404	0.0365416	Osr1/Shh/Wt1	3	BP
GO:1902023	L-arginine transport	3/460	12/17859	0.00314046	0.0453404	0.0365416	Arg1/Slc47a1/Slc7a2	3	BP
GO:0051926	negative regulation of calcium ion transport	7/460	75/17859	0.0031571	0.0454343	0.0366173	Adra2a/Crhr2/Fkbp1b/Gstm7/Ptgs2/Rrad/Tlr9	7	BP
GO:0045055	regulated exocytosis	16/460	286/17859	0.00316484	0.0454343	0.0366173	Adora2a/Adora2b/Adra2a/Bcl2l1/Ccl3/Gab2/Itgam/Pfn2/Plek/Rab11fip1/Rabgef1/Rest/Rph3al/Snca/Sptbn2/Stx11	16	BP
GO:0062013	positive regulation of small molecule metabolic process	11/460	162/17859	0.00322523	0.0460981	0.0371523	Adora2b/Bcl2l1/Bmp6/Dgat2/Nos2/Pmaip1/Ppard/Ptgs2/Rdh10/Slc45a3/Snca	11	BP
GO:0002683	negative regulation of immune system process	22/460	450/17859	0.00322923	0.0460981	0.0371523	Adora2a/Apod/Arg1/Ccl3/Ccr1/Cd274/Cx3cr1/Fcgr2b/Fcrlb/Grem1/Il10/Il1rl1/Lgals7/Olfm4/Pag1/Pglyrp1/Rabgef1/Runx3/Samsn1/Shh/Thbs1/Trib1	22	BP
GO:0009612	response to mechanical stimulus	18/460	340/17859	0.00325961	0.0462928	0.0373092	Acta1/Atp2b2/Bmp6/Bnip3/Cyp11b2/Fosl2/Gadd45a/Il1rl1/Junb/Kcnj2/Ltbp1/Mag/Ngf/Nos2/Ptgs2/Rest/Slc2a1/Thbs1	18	BP
GO:0006836	neurotransmitter transport	15/460	261/17859	0.00327019	0.0462928	0.0373092	Adora2a/Adora2b/Adra2a/Bcl2l1/Gfap/Mctp2/Nat8l/Ngf/Pfn2/Slc32a1/Slc6a13/Slc6a4/Slc6a6/Snca/Sptbn2	15	BP
GO:0033002	muscle cell proliferation	15/460	261/17859	0.00327019	0.0462928	0.0373092	Adamts1/Apod/Cdkn1a/Elane/Ereg/Ern1/Gna13/Il10/Nampt/Nrg1/Ppard/Ptgs2/Shh/Thbs1/Trib1	15	BP
GO:0006816	calcium ion transport	22/460	451/17859	0.00331589	0.0468093	0.0377255	Adora2a/Adra2a/Atp2b2/Ccl12/Ccl3/Ccl4/Ccr1/Crhr2/Ddit3/Ero1a/Fkbp1b/Gstm7/Mcoln2/Ngf/Plp1/Ptgs2/Ramp3/Rrad/Saraf/Snca/Tlr9/Tmem38b	22	BP
GO:0043030	regulation of macrophage activation	6/460	57/17859	0.00337868	0.0475635	0.0383334	Il10/Il1rl1/Mmp8/Slc7a2/Snca/Thbs1	6	BP
GO:0080164	regulation of nitric oxide metabolic process	7/460	76/17859	0.0034021	0.047761	0.0384925	Acp5/Cx3cr1/Gla/Il10/Mmp8/Ptgis/Ptgs2	7	BP
GO:0050867	positive regulation of cell activation	19/460	369/17859	0.003446	0.048191	0.0388391	Adora2b/Cd274/Cdkn1a/Clcf1/Clec4d/Gab2/Il10/Il1a/Il1rl1/Il23a/Itgam/Mmp8/Nlrp3/Plek/Runx3/Selp/Shh/Thbs1/Tlr9	19	BP
GO:0016485	protein processing	14/460	237/17859	0.00346118	0.048191	0.0388391	Cma1/Fcmr/Ggt1/Il1r2/Klk7/Perp/Ppp1r15a/Prss12/Pthlh/Rhbdd1/Shh/Srgn/Thbs1/Tmprss2	14	BP
GO:0045664	regulation of neuron differentiation	14/460	237/17859	0.00346118	0.048191	0.0388391	Bcl11a/Bmp6/Esrp1/Foxo3/Gpr37l1/Mag/Mmd2/Ngf/Ngfr/Ntf4/Rest/Ret/Shh/Slc6a4	14	BP
GO:0043491	protein kinase B signaling	13/460	212/17859	0.00347281	0.0482208	0.0388631	C1qtnf3/Cass4/Ccl3/Cx3cr1/Ddit3/Fam110c/Ngfr/Nrg1/Pik3cb/Ramp3/Ret/Sesn2/Thbs1	13	BP
GO:0031649	heat generation	4/460	25/17859	0.00357691	0.0493963	0.0398105	Arrdc3/Il1a/Il1rn/Ptgs2	4	BP
GO:1901623	regulation of lymphocyte chemotaxis	4/460	25/17859	0.00357691	0.0493963	0.0398105	Ccl3/Ccl4/Ccl7/Cxcl14	4	BP
