# Supplementary material for: Transplantation of Wharton's jelly mesenchymal stem cells encapsulated with Hydroactive® Gel promotes diabetic wound antifibrotic healing in type 2 diabetic rats
Source: Royal Society of Chemistry journal article supplement (doi:10.1039/d2tb01649d), 2022-01-01
Supplement: d2tb01649d8.xlsx [file d2tb01649d8.xlsx]

## Sheet: The DEGs in D14MSC vs. D14CON
ID	Description	GeneRatio	BgRatio	pvalue	p.adjust	qvalue	geneID	Count	type
GO:0140375	immune receptor activity	22/207	131/16532	7.2184e-19	3.28437e-16	2.78098e-16	C3ar1/Ccr4/Ccr5/Ccr6/Ccr7/Ccr9/Cd74/Cx3cr1/Cxcr3/Fcar/Fcgr3a/Flt3/Gpr35/Il21r/Il2ra/Il2rb/Klrc1/Klrd1/Klrk1/Lilrc2/RT1-Db1/Xcr1	22	MF
GO:0019956	chemokine binding	10/207	34/16532	7.68933e-12	1.4283e-09	1.20939e-09	Ccr4/Ccr5/Ccr6/Ccr7/Ccr9/Cx3cr1/Cxcr3/Itga4/Itgb3/Xcr1	10	MF
GO:0004950	chemokine receptor activity	9/207	25/16532	1.09172e-11	1.4283e-09	1.20939e-09	Ccr4/Ccr5/Ccr6/Ccr7/Ccr9/Cx3cr1/Cxcr3/Gpr35/Xcr1	9	MF
GO:0004896	cytokine receptor activity	14/207	95/16532	1.25565e-11	1.4283e-09	1.20939e-09	Ccr4/Ccr5/Ccr6/Ccr7/Ccr9/Cd74/Cx3cr1/Cxcr3/Flt3/Gpr35/Il21r/Il2ra/Il2rb/Xcr1	14	MF
GO:0001637	G protein-coupled chemoattractant receptor activity	9/207	26/16532	1.6517e-11	1.50305e-09	1.27268e-09	Ccr4/Ccr5/Ccr6/Ccr7/Ccr9/Cx3cr1/Cxcr3/Gpr35/Xcr1	9	MF
GO:0023023	MHC protein complex binding	8/207	22/16532	1.45165e-10	1.10083e-08	9.32112e-09	Cd74/Klrc1/Klrd1/RT1-Ba/RT1-DOa/RT1-DOb/RT1-Da/RT1-Db1	8	MF
GO:0016493	C-C chemokine receptor activity	8/207	24/16532	3.26778e-10	2.12406e-08	1.79851e-08	Ccr4/Ccr5/Ccr6/Ccr7/Ccr9/Cx3cr1/Cxcr3/Xcr1	8	MF
GO:0019957	C-C chemokine binding	8/207	25/16532	4.75418e-10	2.70394e-08	2.28951e-08	Ccr4/Ccr5/Ccr6/Ccr7/Ccr9/Cx3cr1/Cxcr3/Xcr1	8	MF
GO:0019955	cytokine binding	14/207	141/16532	2.68052e-09	1.35515e-07	1.14745e-07	Ccr4/Ccr5/Ccr6/Ccr7/Ccr9/Cd74/Cx3cr1/Cxcr3/Il2ra/Il2rb/Itga4/Itgb3/Tnfrsf14/Xcr1	14	MF
GO:0045028	G protein-coupled purinergic nucleotide receptor activity	6/207	12/16532	3.1109e-09	1.41546e-07	1.19852e-07	Gpr171/P2ry10/P2ry12/P2ry13/P2ry14/P2ry6	6	MF
GO:0003823	antigen binding	10/207	64/16532	6.40834e-09	2.65072e-07	2.24445e-07	Cd40/Fcnb/Itga4/Klrd1/Lck/RT1-Ba/RT1-CE4/RT1-Da/RT1-Db1/RT1-S3	10	MF
GO:0023026	MHC class II protein complex binding	6/207	14/16532	9.90095e-09	3.75411e-07	3.17873e-07	Cd74/RT1-Ba/RT1-DOa/RT1-DOb/RT1-Da/RT1-Db1	6	MF
GO:0001614	purinergic nucleotide receptor activity	6/207	20/16532	1.20018e-07	3.90058e-06	3.30275e-06	Gpr171/P2ry10/P2ry12/P2ry13/P2ry14/P2ry6	6	MF
GO:0016502	nucleotide receptor activity	6/207	20/16532	1.20018e-07	3.90058e-06	3.30275e-06	Gpr171/P2ry10/P2ry12/P2ry13/P2ry14/P2ry6	6	MF
GO:0042609	CD4 receptor binding	4/207	9/16532	2.86432e-06	8.68845e-05	7.35679e-05	Cd22/Cd74/Lck/RT1-Db1	4	MF
GO:0042608	T cell receptor binding	4/207	10/16532	4.72705e-06	0.000134426	0.000113822	Lck/RT1-Da/RT1-Db1/RT1-S3	4	MF
GO:0019960	C-X3-C chemokine binding	3/207	5/16532	1.89941e-05	0.000480129	0.000406541	Cx3cr1/Itga4/Itgb3	3	MF
GO:0032394	MHC class Ib receptor activity	3/207	5/16532	1.89941e-05	0.000480129	0.000406541	Klrc1/Klrd1/Klrk1	3	MF
GO:0042287	MHC protein binding	5/207	32/16532	4.4844e-05	0.0010739	0.000909303	Cd74/Klrd1/Klrk1/Lag3/RT1-S3	5	MF
GO:0042605	peptide antigen binding	5/207	35/16532	7.01204e-05	0.00159524	0.00135074	RT1-Ba/RT1-CE4/RT1-Da/RT1-Db1/RT1-S3	5	MF
GO:0008528	G protein-coupled peptide receptor activity	9/207	147/16532	9.85881e-05	0.00213608	0.00180868	Ccr4/Ccr5/Ccr6/Ccr7/Ccr9/Cx3cr1/Cxcr3/Gpr35/Xcr1	9	MF
GO:0001653	peptide receptor activity	9/207	156/16532	0.000155065	0.00320702	0.00271549	Ccr4/Ccr5/Ccr6/Ccr7/Ccr9/Cx3cr1/Cxcr3/Gpr35/Xcr1	9	MF
GO:1990405	protein antigen binding	3/207	12/16532	0.000391609	0.00774704	0.00655967	Itga4/Klrd1/Lck	3	MF
GO:0016004	phospholipase activator activity	3/207	16/16532	0.000960643	0.0168112	0.0142346	Ccl12/Ccl5/Lck	3	MF
GO:0022848	acetylcholine-gated cation-selective channel activity	3/207	16/16532	0.000960643	0.0168112	0.0142346	Chrna1/Chrnd/Chrng	3	MF
GO:0045125	bioactive lipid receptor activity	3/207	16/16532	0.000960643	0.0168112	0.0142346	Gpr174/Gpr31/S1pr4	3	MF
GO:0008009	chemokine activity	4/207	37/16532	0.00114091	0.0192264	0.0162796	Ccl12/Ccl5/Cxcl9/Xcl1	4	MF
GO:0060229	lipase activator activity	3/207	18/16532	0.0013742	0.0223308	0.0189082	Ccl12/Ccl5/Lck	3	MF
GO:0042379	chemokine receptor binding	5/207	68/16532	0.0016126	0.0246953	0.0209103	Ccl12/Ccl5/Cx3cr1/Cxcl9/Xcl1	5	MF
GO:0030246	carbohydrate binding	10/207	260/16532	0.00165907	0.0246953	0.0209103	Clec4a3/Fcnb/Klrb1c/Klrd1/Klri1/Klrk1/RT1-Da/RT1-Db1/Sell/Siglec1	10	MF
GO:0004715	non-membrane spanning protein tyrosine kinase activity	4/207	41/16532	0.00168254	0.0246953	0.0209103	Blk/Lck/Txk/Zap70	4	MF
GO:0001609	G protein-coupled adenosine receptor activity	2/207	6/16532	0.00226414	0.0312177	0.026433	Adora2a/P2ry12	2	MF
GO:0023024	MHC class I protein complex binding	2/207	6/16532	0.00226414	0.0312177	0.026433	Klrc1/Klrd1	2	MF
GO:0003725	double-stranded RNA binding	5/207	78/16532	0.0029535	0.0395248	0.0334669	Dhx58/Oas2/Oas3/Oasl/Zbp1	5	MF
GO:0042289	MHC class II protein binding	2/207	7/16532	0.0031437	0.0408681	0.0346043	Cd74/Lag3	2	MF
GO:0008047	enzyme activator activity	5/207	83/16532	0.0038633	0.0488278	0.0413441	Ccl12/Ccl5/Lck/Ncf1/Ncf4	5	MF
GO:0016176	superoxide-generating NADPH oxidase activator activity	2/207	8/16532	0.00415711	0.049776	0.0421469	Ncf1/Ncf4	2	MF
GO:0016494	C-X-C chemokine receptor activity	2/207	8/16532	0.00415711	0.049776	0.0421469	Cxcr3/Gpr35	2	MF
GO:0009897	external side of plasma membrane	48/230	428/18211	9.60319e-32	2.34318e-29	2.18346e-29	Ccr4/Ccr5/Ccr6/Ccr7/Ccr9/Cd2/Cd22/Cd226/Cd27/Cd3d/Cd3e/Cd3g/Cd40/Cd40lg/Cd5/Cd6/Cd74/Cd79b/Ctla4/Cx3cr1/Cxcl9/Cxcr3/Fcgr3a/Fcnb/Flt3/Il2ra/Il2rb/Itga4/Itgal/Itgb3/Klrc1/Klrc3/Klrd1/Klrk1/Lag3/Ly9/P2ry12/Ptprc/RT1-Ba/RT1-CE4/RT1-Db1/RT1-S3/Sell/Slamf7/Slamf9/Spn/Tnfrsf14/Xcr1	48	CC
GO:0001772	immunological synapse	10/230	44/18211	1.44706e-10	1.76541e-08	1.64508e-08	Cd3e/Cd6/Coro1a/Havcr2/Itgal/Lck/RT1-Da/RT1-Db1/Rhoh/Zap70	10	CC
GO:0098802	plasma membrane signaling receptor complex	16/230	169/18211	4.57496e-10	3.72097e-08	3.46734e-08	Cd247/Cd3d/Cd3e/Cd3g/Cd40/Cd79b/Chrna1/Chrnd/Chrng/Itga4/Itgad/Itgal/Itgb3/Itgb7/Tlr1/Zap70	16	CC
GO:0042611	MHC protein complex	7/230	18/18211	1.32291e-09	8.06977e-08	7.51972e-08	Cd74/RT1-Ba/RT1-DOa/RT1-DOb/RT1-Da/RT1-Db1/RT1-S3	7	CC
GO:0042613	MHC class II protein complex	6/230	13/18211	6.05999e-09	2.95727e-07	2.7557e-07	Cd74/RT1-Ba/RT1-DOa/RT1-DOb/RT1-Da/RT1-Db1	6	CC
GO:0042105	alpha-beta T cell receptor complex	4/230	5/18211	1.22735e-07	4.65776e-06	4.34028e-06	Cd247/Cd3d/Cd3e/Cd3g	4	CC
GO:0042101	T cell receptor complex	5/230	11/18211	1.33624e-07	4.65776e-06	4.34028e-06	Cd247/Cd3d/Cd3e/Cd3g/Zap70	5	CC
GO:0043235	receptor complex	20/230	395/18211	1.54181e-07	4.70253e-06	4.38199e-06	Cd247/Cd3d/Cd3e/Cd3g/Cd40/Cd74/Cd79b/Chrna1/Chrnd/Chrng/Flt3/Itga4/Itgad/Itgal/Itgb3/Itgb7/Klrc1/Klrd1/Tlr1/Zap70	20	CC
GO:0098636	protein complex involved in cell adhesion	6/230	37/18211	6.3708e-06	0.000172719	0.000160947	Ctla4/Itga4/Itgad/Itgal/Itgb3/Itgb7	6	CC
GO:0008305	integrin complex	5/230	32/18211	4.69058e-05	0.0011445	0.00106649	Itga4/Itgad/Itgal/Itgb3/Itgb7	5	CC
GO:0005892	acetylcholine-gated channel complex	3/230	16/18211	0.000986068	0.0218728	0.0203819	Chrna1/Chrnd/Chrng	3	CC
GO:0007159	leukocyte cell-cell adhesion	42/217	364/17859	5.25203e-29	1.62445e-25	1.21018e-25	Adora2a/Aif1/Alox5/Ccl5/Ccr7/Cd27/Cd3e/Cd40lg/Cd5/Cd6/Cd74/Coro1a/Ctla4/Cx3cr1/Havcr2/Il2ra/Itga4/Itgal/Itgb7/Lag3/Lck/Nr4a3/Ptpn22/Ptprc/RT1-Ba/RT1-DOa/RT1-DOb/RT1-Da/RT1-Db1/RT1-S3/Rhoh/Runx3/Sash3/Sell/Selplg/Socs1/Spn/Tbx21/Tnfrsf14/Xcl1/Zap70/Zc3h12d	42	BP
GO:0051249	regulation of lymphocyte activation	46/217	470/17859	1.2981e-28	2.0075e-25	1.49554e-25	Adora2a/Aif1/Blk/Ccl5/Ccr7/Cd22/Cd27/Cd3e/Cd40/Cd40lg/Cd5/Cd6/Cd74/Coro1a/Ctla4/Flt3/Havcr2/Ikzf3/Il2ra/Itgal/Lag3/Lck/Mzb1/Ptpn22/Ptprc/RT1-Ba/RT1-DOa/RT1-DOb/RT1-Da/RT1-Db1/RT1-S3/Rhoh/Runx3/Samsn1/Sash3/Sit1/Slamf7/Socs1/Spn/Tbc1d10c/Tbx21/Tnfrsf14/Xcl1/Zap70/Zc3h12d/Zfp36l2	46	BP
GO:0002250	adaptive immune response	43/217	414/17859	8.51799e-28	8.78204e-25	6.54241e-25	C3/C3ar1/Ccr6/Cd226/Cd3d/Cd3e/Cd3g/Cd40/Cd40lg/Cd7/Cd74/Cd79b/Cx3cr1/Gapt/Gzmm/Havcr2/Irf7/Klhl6/Klrc1/Klrd1/Klrk1/Lag3/Ly9/Myo1g/Prf1/Prkcb/Ptprc/RT1-Ba/RT1-CE4/RT1-DOa/RT1-DOb/RT1-Da/RT1-Db1/RT1-S3/Samsn1/Sash3/Sit1/Spn/Tbx21/Tnfrsf14/Txk/Xcl1/Zap70	43	BP
GO:1903037	regulation of leukocyte cell-cell adhesion	38/217	324/17859	1.6122e-26	1.24663e-23	9.2871e-24	Adora2a/Aif1/Alox5/Ccl5/Ccr7/Cd27/Cd3e/Cd40lg/Cd5/Cd6/Cd74/Coro1a/Ctla4/Havcr2/Il2ra/Itga4/Itgal/Lag3/Lck/Nr4a3/Ptpn22/Ptprc/RT1-Ba/RT1-DOa/RT1-DOb/RT1-Da/RT1-Db1/RT1-S3/Rhoh/Runx3/Sash3/Socs1/Spn/Tbx21/Tnfrsf14/Xcl1/Zap70/Zc3h12d	38	BP
GO:1903039	positive regulation of leukocyte cell-cell adhesion	33/217	231/17859	6.90053e-26	4.26867e-23	3.18006e-23	Aif1/Alox5/Ccl5/Ccr7/Cd27/Cd3e/Cd40lg/Cd5/Cd6/Cd74/Coro1a/Havcr2/Il2ra/Itga4/Itgal/Lck/Nr4a3/Ptpn22/Ptprc/RT1-Ba/RT1-DOa/RT1-DOb/RT1-Da/RT1-Db1/RT1-S3/Rhoh/Runx3/Sash3/Socs1/Spn/Tnfrsf14/Xcl1/Zap70	33	BP
GO:1903131	mononuclear cell differentiation	43/217	467/17859	1.17426e-25	6.0533e-23	4.50956e-23	Batf3/Blk/Ccr6/Ccr7/Ccr9/Cd27/Cd3d/Cd3e/Cd3g/Cd40lg/Cd74/Cd79b/Coro1a/Ctla4/Flt3/Gpr18/Ikzf3/Il2ra/Irf8/Klrc1/Lag3/Lck/Ly9/Pou2f2/Prex1/Ptpn22/Ptprc/RT1-Ba/RT1-DOa/RT1-Da/RT1-Db1/Rhoh/Runx3/Sash3/Slamf9/Socs1/Spib/Spn/Tbx21/Trpm2/Txk/Zap70/Zfp36l2	43	BP
GO:0022407	regulation of cell-cell adhesion	41/217	450/17859	2.73657e-24	1.09943e-21	8.19048e-22	Adora2a/Aif1/Akna/Alox5/Blk/Ccl5/Ccr5/Ccr7/Cd27/Cd3e/Cd40lg/Cd5/Cd6/Cd74/Coro1a/Ctla4/Havcr2/Il2ra/Itga4/Itgal/Lag3/Lck/Nr4a3/Ptpn22/Ptprc/RT1-Ba/RT1-DOa/RT1-DOb/RT1-Da/RT1-Db1/RT1-S3/Rhoh/Runx3/Sash3/Socs1/Spn/Tbx21/Tnfrsf14/Xcl1/Zap70/Zc3h12d	41	BP
GO:0022409	positive regulation of cell-cell adhesion	34/217	280/17859	2.84366e-24	1.09943e-21	8.19048e-22	Aif1/Alox5/Ccl5/Ccr5/Ccr7/Cd27/Cd3e/Cd40lg/Cd5/Cd6/Cd74/Coro1a/Havcr2/Il2ra/Itga4/Itgal/Lck/Nr4a3/Ptpn22/Ptprc/RT1-Ba/RT1-DOa/RT1-DOb/RT1-Da/RT1-Db1/RT1-S3/Rhoh/Runx3/Sash3/Socs1/Spn/Tnfrsf14/Xcl1/Zap70	34	BP
GO:0050863	regulation of T cell activation	36/217	333/17859	6.61123e-24	2.27206e-21	1.69263e-21	Adora2a/Aif1/Ccl5/Ccr7/Cd27/Cd3e/Cd40lg/Cd5/Cd6/Cd74/Coro1a/Ctla4/Havcr2/Il2ra/Itgal/Lag3/Lck/Ptpn22/Ptprc/RT1-Ba/RT1-DOa/RT1-DOb/RT1-Da/RT1-Db1/RT1-S3/Rhoh/Runx3/Sash3/Sit1/Socs1/Spn/Tbx21/Tnfrsf14/Xcl1/Zap70/Zc3h12d	36	BP
GO:0050870	positive regulation of T cell activation	30/217	207/17859	8.80085e-24	2.7221e-21	2.0279e-21	Aif1/Ccl5/Ccr7/Cd27/Cd3e/Cd40lg/Cd5/Cd6/Cd74/Coro1a/Havcr2/Il2ra/Itgal/Lck/Ptpn22/Ptprc/RT1-Ba/RT1-DOa/RT1-DOb/RT1-Da/RT1-Db1/RT1-S3/Rhoh/Runx3/Sash3/Socs1/Spn/Tnfrsf14/Xcl1/Zap70	30	BP
GO:0030098	lymphocyte differentiation	39/217	416/17859	1.43686e-23	4.04019e-21	3.00984e-21	Ccr6/Ccr7/Ccr9/Cd27/Cd3d/Cd3e/Cd3g/Cd40lg/Cd74/Cd79b/Coro1a/Ctla4/Flt3/Gpr18/Ikzf3/Il2ra/Irf8/Klrc1/Lag3/Lck/Ly9/Pou2f2/Prex1/Ptpn22/Ptprc/RT1-Ba/RT1-DOa/RT1-Da/RT1-Db1/Rhoh/Runx3/Sash3/Socs1/Spib/Spn/Tbx21/Txk/Zap70/Zfp36l2	39	BP
GO:0002764	immune response-regulating signaling pathway	37/217	375/17859	3.73437e-23	9.62533e-21	7.17064e-21	Blk/C3ar1/Ccr7/Cd22/Cd226/Cd247/Cd3e/Cd40/Cd79b/Ctla4/Dhx58/Fcar/Fcgr3a/Fcnb/Havcr2/Irf7/Klhl6/Klrc1/Klrd1/Klrk1/LOC681325/Lck/Myo1g/Nr4a3/Oas3/Oasl/Prkcb/Ptpn22/Ptprc/RT1-Db1/Sla2/Spn/Tlr1/Tlr12/Tlr5/Txk/Zap70	37	BP
GO:0002696	positive regulation of leukocyte activation	36/217	354/17859	5.45645e-23	1.29822e-20	9.67139e-21	Aif1/Ccl5/Ccr7/Cd226/Cd27/Cd3e/Cd40/Cd40lg/Cd5/Cd6/Cd74/Coro1a/Havcr1/Havcr2/Il2ra/Itgal/Klrk1/Lck/Nr4a3/Ptpn22/Ptprc/RT1-Ba/RT1-DOa/RT1-DOb/RT1-Da/RT1-Db1/RT1-S3/Rhoh/Runx3/Sash3/Socs1/Spn/Tbx21/Tnfrsf14/Xcl1/Zap70	36	BP
GO:0030217	T cell differentiation	33/217	293/17859	1.59184e-22	3.51683e-20	2.61995e-20	Ccr6/Ccr7/Ccr9/Cd27/Cd3d/Cd3e/Cd3g/Cd74/Coro1a/Ctla4/Flt3/Gpr18/Il2ra/Klrc1/Lag3/Lck/Ly9/Prex1/Ptpn22/Ptprc/RT1-Ba/RT1-DOa/RT1-Da/RT1-Db1/Rhoh/Runx3/Sash3/Socs1/Spn/Tbx21/Txk/Zap70/Zfp36l2	33	BP
GO:0050867	positive regulation of cell activation	36/217	369/17859	2.25786e-22	4.6557e-20	3.46838e-20	Aif1/Ccl5/Ccr7/Cd226/Cd27/Cd3e/Cd40/Cd40lg/Cd5/Cd6/Cd74/Coro1a/Havcr1/Havcr2/Il2ra/Itgal/Klrk1/Lck/Nr4a3/Ptpn22/Ptprc/RT1-Ba/RT1-DOa/RT1-DOb/RT1-Da/RT1-Db1/RT1-S3/Rhoh/Runx3/Sash3/Socs1/Spn/Tbx21/Tnfrsf14/Xcl1/Zap70	36	BP
GO:0002443	leukocyte mediated immunity	37/217	414/17859	1.17302e-21	2.26759e-19	1.6893e-19	Blk/C3/Ccr6/Cd226/Cd40/Cd40lg/Cd74/Cd96/Coro1a/Cx3cr1/Fcar/Gapt/Gzmm/Havcr2/Irf7/Klrc1/Klrd1/Klrk1/Lag3/Myo1g/Ncf1/Nr4a3/Prf1/Ptprc/RT1-Ba/RT1-CE4/RT1-DOa/RT1-DOb/RT1-Da/RT1-Db1/RT1-S3/Sash3/Slamf9/Spn/Tac4/Tbx21/Xcl1	37	BP
GO:0051251	positive regulation of lymphocyte activation	32/217	292/17859	1.70779e-21	3.10717e-19	2.31477e-19	Aif1/Ccl5/Ccr7/Cd27/Cd3e/Cd40/Cd40lg/Cd5/Cd6/Cd74/Coro1a/Havcr2/Il2ra/Itgal/Lck/Ptpn22/Ptprc/RT1-Ba/RT1-DOa/RT1-DOb/RT1-Da/RT1-Db1/RT1-S3/Rhoh/Runx3/Sash3/Socs1/Spn/Tbx21/Tnfrsf14/Xcl1/Zap70	32	BP
GO:0045785	positive regulation of cell adhesion	38/217	467/17859	8.47822e-21	1.45684e-18	1.08531e-18	Aif1/Alox5/Ccl5/Ccr5/Ccr7/Cd27/Cd3e/Cd40lg/Cd5/Cd6/Cd74/Coro1a/Disc1/Havcr2/Il2ra/Itga4/Itgal/Itgb3/Lck/Nr4a3/P2ry12/Prex1/Ptpn22/Ptprc/RT1-Ba/RT1-DOa/RT1-DOb/RT1-Da/RT1-Db1/RT1-S3/Rhoh/Runx3/Sash3/Socs1/Spn/Tnfrsf14/Xcl1/Zap70	38	BP
GO:0002768	immune response-regulating cell surface receptor signaling pathway	28/217	225/17859	2.08636e-20	3.39637e-18	2.53021e-18	Blk/C3ar1/Ccr7/Cd22/Cd226/Cd247/Cd3e/Cd40/Cd79b/Ctla4/Fcar/Fcgr3a/Fcnb/Klhl6/Klrc1/Klrd1/Klrk1/Lck/Myo1g/Nr4a3/Prkcb/Ptpn22/Ptprc/RT1-Db1/Sla2/Spn/Txk/Zap70	28	BP
GO:0002683	negative regulation of immune system process	36/217	450/17859	1.74866e-19	2.7043e-17	2.01464e-17	Adora2a/Blk/Cd22/Cd74/Cd96/Ctla4/Cx3cr1/Dhx58/Flt3/Gpr18/Havcr2/Il2ra/Klrc1/Klrd1/Klrk1/Lag3/Oas3/Padi2/Ptpn22/Ptprc/RT1-Ba/RT1-DOa/RT1-DOb/RT1-Db1/RT1-S3/Runx3/Samhd1/Samsn1/Sla2/Socs1/Spn/Tbc1d10c/Tbx21/Tnfrsf14/Xcl1/Zc3h12d	36	BP
GO:0050900	leukocyte migration	33/217	382/17859	6.36775e-19	9.37879e-17	6.98697e-17	Aif1/Alox5/C3ar1/Ccl12/Ccl5/Ccr5/Ccr6/Ccr7/Cd74/Coro1a/Cx3cr1/Cxcl9/Cxcr3/Gpr18/Itga4/Itgal/Itgb3/Itgb7/Klrk1/Myo1g/P2ry12/Padi2/Prex1/Ptpn22/Rhoh/Sell/Selplg/Slamf9/Spn/Tbx21/Tnfrsf14/Trpm2/Xcl1	33	BP
GO:0002449	lymphocyte mediated immunity	30/217	309/17859	1.08477e-18	1.52509e-16	1.13616e-16	C3/Ccr6/Cd226/Cd40/Cd40lg/Cd74/Cd96/Coro1a/Gapt/Gzmm/Havcr2/Irf7/Klrc1/Klrd1/Klrk1/Lag3/Myo1g/Prf1/Ptprc/RT1-Ba/RT1-CE4/RT1-DOa/RT1-DOb/RT1-Da/RT1-Db1/RT1-S3/Sash3/Spn/Tbx21/Xcl1	30	BP
GO:0070663	regulation of leukocyte proliferation	28/217	261/17859	1.17746e-18	1.58343e-16	1.17961e-16	Aif1/Blk/Ccl12/Ccl5/Cd22/Cd3e/Cd40/Cd40lg/Cd6/Cd74/Coro1a/Ctla4/Havcr2/Ikzf3/Il2ra/Itgal/Mzb1/Ptpn22/Ptprc/RT1-Ba/RT1-Db1/RT1-S3/Sash3/Spn/Tnfrsf14/Xcl1/Zap70/Zc3h12d	28	BP
GO:0050670	regulation of lymphocyte proliferation	27/217	242/17859	1.83288e-18	2.36213e-16	1.75973e-16	Aif1/Blk/Ccl5/Cd22/Cd3e/Cd40/Cd40lg/Cd6/Cd74/Coro1a/Ctla4/Havcr2/Ikzf3/Il2ra/Itgal/Mzb1/Ptpn22/Ptprc/RT1-Ba/RT1-Db1/RT1-S3/Sash3/Spn/Tnfrsf14/Xcl1/Zap70/Zc3h12d	27	BP
GO:0046651	lymphocyte proliferation	30/217	316/17859	2.04299e-18	2.52759e-16	1.88299e-16	Aif1/Blk/Ccl5/Cd22/Cd3e/Cd40/Cd40lg/Cd6/Cd74/Coro1a/Ctla4/Flt3/Gapt/Havcr2/Ikzf3/Il2ra/Itgad/Itgal/Mzb1/Ptpn22/Ptprc/RT1-Ba/RT1-Db1/RT1-S3/Sash3/Spn/Tnfrsf14/Xcl1/Zap70/Zc3h12d	30	BP
GO:0070661	leukocyte proliferation	31/217	343/17859	2.2006e-18	2.61787e-16	1.95025e-16	Aif1/Blk/Ccl12/Ccl5/Cd22/Cd3e/Cd40/Cd40lg/Cd6/Cd74/Coro1a/Ctla4/Flt3/Gapt/Havcr2/Ikzf3/Il2ra/Itgad/Itgal/Mzb1/Ptpn22/Ptprc/RT1-Ba/RT1-Db1/RT1-S3/Sash3/Spn/Tnfrsf14/Xcl1/Zap70/Zc3h12d	31	BP
GO:0032944	regulation of mononuclear cell proliferation	27/217	246/17859	2.80751e-18	3.21616e-16	2.39596e-16	Aif1/Blk/Ccl5/Cd22/Cd3e/Cd40/Cd40lg/Cd6/Cd74/Coro1a/Ctla4/Havcr2/Ikzf3/Il2ra/Itgal/Mzb1/Ptpn22/Ptprc/RT1-Ba/RT1-Db1/RT1-S3/Sash3/Spn/Tnfrsf14/Xcl1/Zap70/Zc3h12d	27	BP
GO:0032943	mononuclear cell proliferation	30/217	320/17859	2.91193e-18	3.21664e-16	2.39632e-16	Aif1/Blk/Ccl5/Cd22/Cd3e/Cd40/Cd40lg/Cd6/Cd74/Coro1a/Ctla4/Flt3/Gapt/Havcr2/Ikzf3/Il2ra/Itgad/Itgal/Mzb1/Ptpn22/Ptprc/RT1-Ba/RT1-Db1/RT1-S3/Sash3/Spn/Tnfrsf14/Xcl1/Zap70/Zc3h12d	30	BP
GO:0001819	positive regulation of cytokine production	35/217	493/17859	2.56419e-17	2.73484e-15	2.03739e-15	Aif1/C3/C3ar1/Ccr5/Ccr7/Cd2/Cd226/Cd3e/Cd40/Cd40lg/Cd6/Cd74/Dhx58/Fcnb/Flt3/Havcr2/Irf7/Irf8/Klrk1/Ly9/Nlrc4/Nr4a3/Oas2/Oas3/Pou2f2/Ptpn22/Ptprc/RT1-S3/Sash3/Spn/Tlr1/Tlr5/Tnfrsf14/Txk/Xcl1	35	BP
GO:0002460	adaptive immune response based on somatic recombination of immune receptors built from immunoglobulin superfamily domains	29/217	327/17859	4.99103e-17	5.14576e-15	3.83347e-15	C3/C3ar1/Ccr6/Cd226/Cd40/Cd40lg/Cd74/Gapt/Gzmm/Havcr2/Irf7/Klhl6/Klrc1/Klrd1/Ly9/Myo1g/Prf1/Ptprc/RT1-Ba/RT1-CE4/RT1-DOa/RT1-DOb/RT1-Da/RT1-Db1/RT1-S3/Sash3/Spn/Tbx21/Xcl1	29	BP
GO:0002429	immune response-activating cell surface receptor signaling pathway	24/217	206/17859	5.89272e-17	5.87941e-15	4.38002e-15	Blk/C3ar1/Ccr7/Cd22/Cd226/Cd247/Cd3e/Cd79b/Ctla4/Fcnb/Klhl6/Klrd1/Klrk1/Lck/Myo1g/Nr4a3/Prkcb/Ptpn22/Ptprc/RT1-Db1/Sla2/Spn/Txk/Zap70	24	BP
GO:0002757	immune response-activating signal transduction	24/217	207/17859	6.59584e-17	6.37529e-15	4.74944e-15	Blk/C3ar1/Ccr7/Cd22/Cd226/Cd247/Cd3e/Cd79b/Ctla4/Fcnb/Klhl6/Klrd1/Klrk1/Lck/Myo1g/Nr4a3/Prkcb/Ptpn22/Ptprc/RT1-Db1/Sla2/Spn/Txk/Zap70	24	BP
GO:0002253	activation of immune response	27/217	286/17859	1.33894e-16	1.25495e-14	9.34909e-15	Blk/C3/C3ar1/Ccr7/Cd22/Cd226/Cd247/Cd3e/Cd79b/Ctla4/Fcnb/Klhl6/Klrd1/Klrk1/Lck/Myo1g/Nlrc4/Nr4a3/Prkcb/Ptpn22/Ptprc/RT1-Db1/Sla2/Spn/Txk/Zap70/Zbp1	27	BP
GO:0002440	production of molecular mediator of immune response	24/217	222/17859	3.32815e-16	3.02764e-14	2.25552e-14	Ccr6/Cd22/Cd226/Cd40/Cd40lg/Cd74/Cd96/Gapt/Mzb1/Nr4a3/Ptpn22/Ptprc/RT1-Ba/RT1-DOa/RT1-DOb/RT1-Da/RT1-Db1/RT1-S3/Samhd1/Sash3/Slamf9/Tbx21/Tnfrsf14/Xcl1	24	BP
GO:0071674	mononuclear cell migration	22/217	184/17859	7.15111e-16	6.31954e-14	4.70791e-14	Aif1/Alox5/C3ar1/Ccl12/Ccl5/Ccr6/Ccr7/Cx3cr1/Cxcr3/Itga4/Itgal/Itgb3/Itgb7/Klrk1/Myo1g/Padi2/Slamf9/Spn/Tbx21/Tnfrsf14/Trpm2/Xcl1	22	BP
GO:0042129	regulation of T cell proliferation	21/217	183/17859	7.74405e-15	6.60742e-13	4.92237e-13	Aif1/Ccl5/Cd3e/Cd40lg/Cd6/Coro1a/Ctla4/Havcr2/Il2ra/Itgal/Ptpn22/Ptprc/RT1-Ba/RT1-Db1/RT1-S3/Sash3/Spn/Tnfrsf14/Xcl1/Zap70/Zc3h12d	21	BP
GO:0032103	positive regulation of response to external stimulus	30/217	427/17859	7.90413e-15	6.60742e-13	4.92237e-13	Aif1/C3/C3ar1/Ccl5/Ccr4/Ccr5/Ccr6/Ccr7/Cd226/Cd74/Cx3cr1/Cxcl9/Cxcr3/Dhx58/Fcnb/Havcr2/Irf7/Klrd1/Klrk1/Lag3/Ly86/Nlrc4/Ntf3/Oasl/P2ry12/RT1-S3/Sell/Txk/Xcl1/Zbp1	30	BP
GO:0002697	regulation of immune effector process	29/217	397/17859	8.43076e-15	6.8622e-13	5.11217e-13	Blk/C3/Cd22/Cd226/Cd40/Cd40lg/Cd74/Cd96/Cx3cr1/Dhx58/Havcr2/Klrc1/Klrd1/Klrk1/Lag3/Mzb1/Ncf1/Nr4a3/Ptpn22/Ptprc/RT1-CE4/RT1-Da/RT1-Db1/RT1-S3/Sash3/Spn/Tbx21/Tnfrsf14/Xcl1	29	BP
GO:0019221	cytokine-mediated signaling pathway	29/217	410/17859	1.9396e-14	1.53825e-12	1.14596e-12	Ccl12/Ccl5/Ccr4/Ccr5/Ccr6/Ccr7/Ccr9/Cd74/Cx3cr1/Cxcl9/Cxcr3/Flt3/Gpr35/Il21r/Il2ra/Il2rb/Irf7/Lilrc2/Oas2/Oas3/Oasl/Padi2/Ptprc/Samhd1/Socs1/Txk/Xcl1/Xcr1/Zbp1	29	BP
GO:0051250	negative regulation of lymphocyte activation	20/217	173/17859	3.01475e-14	2.33116e-12	1.73666e-12	Adora2a/Blk/Cd74/Ctla4/Flt3/Havcr2/Il2ra/Lag3/Ptpn22/RT1-Ba/RT1-Db1/Runx3/Samsn1/Socs1/Spn/Tbc1d10c/Tbx21/Tnfrsf14/Xcl1/Zc3h12d	20	BP
GO:0042098	T cell proliferation	22/217	221/17859	3.41576e-14	2.57681e-12	1.91966e-12	Aif1/Ccl5/Cd3e/Cd40lg/Cd6/Coro1a/Ctla4/Havcr2/Il2ra/Itgad/Itgal/Ptpn22/Ptprc/RT1-Ba/RT1-Db1/RT1-S3/Sash3/Spn/Tnfrsf14/Xcl1/Zap70/Zc3h12d	22	BP
GO:0050671	positive regulation of lymphocyte proliferation	18/217	145/17859	1.75963e-13	1.29584e-11	9.65372e-12	Aif1/Ccl5/Cd3e/Cd40/Cd40lg/Cd6/Cd74/Coro1a/Havcr2/Il2ra/Itgal/Ptpn22/Ptprc/RT1-S3/Sash3/Spn/Xcl1/Zap70	18	BP
GO:0042102	positive regulation of T cell proliferation	16/217	106/17859	1.82103e-13	1.30987e-11	9.75821e-12	Aif1/Ccl5/Cd3e/Cd40lg/Cd6/Coro1a/Havcr2/Il2ra/Itgal/Ptpn22/Ptprc/RT1-S3/Sash3/Spn/Xcl1/Zap70	16	BP
GO:0032946	positive regulation of mononuclear cell proliferation	18/217	147/17859	2.23893e-13	1.57386e-11	1.17249e-11	Aif1/Ccl5/Cd3e/Cd40/Cd40lg/Cd6/Cd74/Coro1a/Havcr2/Il2ra/Itgal/Ptpn22/Ptprc/RT1-S3/Sash3/Spn/Xcl1/Zap70	18	BP
GO:0070098	chemokine-mediated signaling pathway	14/217	74/17859	2.40672e-13	1.65422e-11	1.23235e-11	Ccl12/Ccl5/Ccr4/Ccr5/Ccr6/Ccr7/Ccr9/Cx3cr1/Cxcl9/Cxcr3/Gpr35/Padi2/Xcl1/Xcr1	14	BP
GO:0072676	lymphocyte migration	16/217	109/17859	2.85321e-13	1.91847e-11	1.42922e-11	Aif1/Ccl12/Ccl5/Ccr6/Cxcr3/Itga4/Itgal/Itgb3/Itgb7/Klrk1/Myo1g/Padi2/Spn/Tbx21/Tnfrsf14/Xcl1	16	BP
GO:0002377	immunoglobulin production	17/217	129/17859	3.12024e-13	2.05338e-11	1.52972e-11	Ccr6/Cd22/Cd40/Cd40lg/Gapt/Mzb1/Ptprc/RT1-Ba/RT1-DOa/RT1-DOb/RT1-Da/RT1-Db1/RT1-S3/Samhd1/Sash3/Tbx21/Xcl1	17	BP
GO:0045619	regulation of lymphocyte differentiation	20/217	196/17859	3.29336e-13	2.12216e-11	1.58096e-11	Cd27/Cd74/Ctla4/Flt3/Ikzf3/Il2ra/Lag3/Lck/Ptprc/RT1-Ba/RT1-DOa/RT1-Da/RT1-Db1/Rhoh/Runx3/Sash3/Socs1/Tbx21/Zap70/Zfp36l2	20	BP
GO:0046631	alpha-beta T cell activation	19/217	175/17859	4.28687e-13	2.70598e-11	2.01589e-11	Adora2a/Cd3e/Clec4a3/Gpr18/Ly9/Ptpn22/Ptprc/RT1-Da/RT1-Db1/RT1-S3/Runx3/Sash3/Socs1/Spn/Tbx21/Tnfrsf14/Txk/Xcl1/Zap70	19	BP
GO:0060326	cell chemotaxis	24/217	311/17859	6.21466e-13	3.84439e-11	2.86398e-11	Aif1/Alox5/C3ar1/Ccl12/Ccl5/Ccr4/Ccr5/Ccr6/Ccr7/Ccr9/Cd74/Coro1a/Cx3cr1/Cxcl9/Cxcr3/Gpr18/Klrk1/Padi2/Prex1/Sell/Slamf9/Trpm2/Xcl1/Xcr1	24	BP
GO:0001906	cell killing	21/217	230/17859	7.35544e-13	4.46086e-11	3.32323e-11	C3/Ccl12/Ccr5/Cd226/Coro1a/Cx3cr1/Cxcl9/Gzmm/Havcr2/Klrc1/Klrd1/Klrk1/Lag3/Ncf1/Prf1/Ptprc/RT1-CE4/RT1-Da/RT1-Db1/RT1-S3/Xcl1	21	BP
GO:0002695	negative regulation of leukocyte activation	20/217	205/17859	7.68853e-13	4.5732e-11	3.40692e-11	Adora2a/Blk/Cd74/Ctla4/Flt3/Havcr2/Il2ra/Lag3/Ptpn22/RT1-Ba/RT1-Db1/Runx3/Samsn1/Socs1/Spn/Tbc1d10c/Tbx21/Tnfrsf14/Xcl1/Zc3h12d	20	BP
GO:0070665	positive regulation of leukocyte proliferation	18/217	158/17859	7.89532e-13	4.60759e-11	3.43254e-11	Aif1/Ccl5/Cd3e/Cd40/Cd40lg/Cd6/Cd74/Coro1a/Havcr2/Il2ra/Itgal/Ptpn22/Ptprc/RT1-S3/Sash3/Spn/Xcl1/Zap70	18	BP
GO:0002685	regulation of leukocyte migration	21/217	233/17859	9.47119e-13	5.33954e-11	3.97783e-11	Aif1/C3ar1/Ccl12/Ccl5/Ccr6/Ccr7/Cd74/Cx3cr1/Cxcr3/Gpr18/Itga4/Itgb3/Klrk1/P2ry12/Padi2/Ptpn22/Rhoh/Sell/Spn/Tnfrsf14/Xcl1	21	BP
GO:0042113	B cell activation	23/217	288/17859	9.49481e-13	5.33954e-11	3.97783e-11	Blk/Ccr6/Cd22/Cd27/Cd40/Cd40lg/Cd74/Cd79b/Ctla4/Flt3/Gapt/Ikzf3/Irf8/Mzb1/Pou2f2/Prkcb/Ptprc/Samsn1/Sash3/Spib/Tbc1d10c/Tbx21/Zfp36l2	23	BP
GO:0002831	regulation of response to biotic stimulus	24/217	318/17859	1.00526e-12	5.55229e-11	4.13632e-11	Cd226/Cd40lg/Cd96/Dhx58/Fcnb/Havcr2/Irf7/Klrc1/Klrd1/Klrk1/Lag3/Ly86/Ncf1/Nlrc4/Oas3/Oasl/Ptpn22/RT1-Db1/RT1-S3/Samhd1/Socs1/Spn/Txk/Zbp1	24	BP
GO:0001909	leukocyte mediated cytotoxicity	17/217	142/17859	1.54356e-12	8.37584e-11	6.2398e-11	Cd226/Coro1a/Cx3cr1/Gzmm/Havcr2/Klrc1/Klrd1/Klrk1/Lag3/Ncf1/Prf1/Ptprc/RT1-CE4/RT1-Da/RT1-Db1/RT1-S3/Xcl1	17	BP
GO:1990868	response to chemokine	14/217	85/17859	1.78315e-12	9.34794e-11	6.96399e-11	Ccl12/Ccl5/Ccr4/Ccr5/Ccr6/Ccr7/Ccr9/Cx3cr1/Cxcl9/Cxcr3/Gpr35/Padi2/Xcl1/Xcr1	14	BP
GO:1990869	cellular response to chemokine	14/217	85/17859	1.78315e-12	9.34794e-11	6.96399e-11	Ccl12/Ccl5/Ccr4/Ccr5/Ccr6/Ccr7/Ccr9/Cx3cr1/Cxcl9/Cxcr3/Gpr35/Padi2/Xcl1/Xcr1	14	BP
GO:0050851	antigen receptor-mediated signaling pathway	18/217	167/17859	2.05696e-12	1.06036e-10	7.89945e-11	Blk/Ccr7/Cd22/Cd226/Cd247/Cd3e/Cd79b/Ctla4/Klhl6/Lck/Prkcb/Ptpn22/Ptprc/RT1-Db1/Sla2/Spn/Txk/Zap70	18	BP
GO:0016064	immunoglobulin mediated immune response	17/217	150/17859	3.80298e-12	1.9283e-10	1.43654e-10	C3/Ccr6/Cd226/Cd40/Cd40lg/Cd74/Gapt/Irf7/Ptprc/RT1-Ba/RT1-DOa/RT1-DOb/RT1-Da/RT1-Db1/RT1-S3/Tbx21/Xcl1	17	BP
GO:0050866	negative regulation of cell activation	20/217	228/17859	5.57855e-12	2.78298e-10	2.07325e-10	Adora2a/Blk/Cd74/Ctla4/Flt3/Havcr2/Il2ra/Lag3/Ptpn22/RT1-Ba/RT1-Db1/Runx3/Samsn1/Socs1/Spn/Tbc1d10c/Tbx21/Tnfrsf14/Xcl1/Zc3h12d	20	BP
GO:1902105	regulation of leukocyte differentiation	23/217	314/17859	5.68446e-12	2.7908e-10	2.07908e-10	Ccl5/Cd27/Cd40lg/Cd74/Ctla4/Evi2b/Flt3/Ikzf3/Il2ra/Lag3/Lck/Ptprc/RT1-Ba/RT1-DOa/RT1-Da/RT1-Db1/Rhoh/Runx3/Sash3/Socs1/Tbx21/Zap70/Zfp36l2	23	BP
GO:0019724	B cell mediated immunity	17/217	154/17859	5.84691e-12	2.80445e-10	2.08925e-10	C3/Ccr6/Cd226/Cd40/Cd40lg/Cd74/Gapt/Irf7/Ptprc/RT1-Ba/RT1-DOa/RT1-DOb/RT1-Da/RT1-Db1/RT1-S3/Tbx21/Xcl1	17	BP
GO:0050868	negative regulation of T cell activation	16/217	132/17859	5.89361e-12	2.80445e-10	2.08925e-10	Adora2a/Cd74/Ctla4/Havcr2/Il2ra/Lag3/Ptpn22/RT1-Ba/RT1-Db1/Runx3/Socs1/Spn/Tbx21/Tnfrsf14/Xcl1/Zc3h12d	16	BP
GO:0030595	leukocyte chemotaxis	20/217	229/17859	6.04774e-12	2.83419e-10	2.11141e-10	Aif1/Alox5/C3ar1/Ccl12/Ccl5/Ccr6/Ccr7/Cd74/Coro1a/Cx3cr1/Cxcl9/Cxcr3/Gpr18/Klrk1/Padi2/Prex1/Sell/Slamf9/Trpm2/Xcl1	20	BP
GO:0009615	response to virus	23/217	322/17859	9.51389e-12	4.39201e-10	3.27194e-10	Batf3/Ccl5/Cd40/Cxcl9/Dhx58/Flt3/Ifi27l2b/Irf7/Oas2/Oas3/Oasl/Pou2f2/Prf1/Psmb9/Ptpn22/Ptprc/Rnase6/Samhd1/Spn/Tagap/Tbx21/Xcl1/Zbp1	23	BP
GO:0045580	regulation of T cell differentiation	17/217	162/17859	1.33087e-11	6.05348e-10	4.5097e-10	Cd27/Cd74/Ctla4/Il2ra/Lag3/Lck/Ptprc/RT1-Ba/RT1-DOa/RT1-Da/RT1-Db1/Rhoh/Runx3/Sash3/Socs1/Tbx21/Zap70	17	BP
GO:0019722	calcium-mediated signaling	19/217	214/17859	1.56555e-11	7.01776e-10	5.22806e-10	Ccr4/Ccr5/Ccr6/Ccr7/Ccr9/Cd22/Cd3e/Cx3cr1/Cxcr3/Efhb/Itgal/P2ry12/Ptgdr2/Ptprc/Sla2/Tbc1d10c/Trpm2/Xcr1/Zap70	19	BP
GO:1903038	negative regulation of leukocyte cell-cell adhesion	16/217	143/17859	2.03444e-11	8.98931e-10	6.69682e-10	Adora2a/Cd74/Ctla4/Havcr2/Il2ra/Lag3/Ptpn22/RT1-Ba/RT1-Db1/Runx3/Socs1/Spn/Tbx21/Tnfrsf14/Xcl1/Zc3h12d	16	BP
GO:0050864	regulation of B cell activation	16/217	144/17859	2.26444e-11	9.86466e-10	7.34894e-10	Blk/Cd22/Cd27/Cd40/Cd40lg/Cd74/Ctla4/Flt3/Ikzf3/Mzb1/Ptprc/Samsn1/Sash3/Tbc1d10c/Tbx21/Zfp36l2	16	BP
GO:0032609	interferon-gamma production	15/217	123/17859	2.5222e-11	1.06391e-09	7.92591e-10	Ccr7/Cd2/Cd226/Cd3e/Cd40lg/Cd96/Flt3/Havcr2/Irf8/Klrk1/Ptpn22/RT1-Db1/Sash3/Txk/Xcl1	15	BP
GO:0032649	regulation of interferon-gamma production	15/217	123/17859	2.5222e-11	1.06391e-09	7.92591e-10	Ccr7/Cd2/Cd226/Cd3e/Cd40lg/Cd96/Flt3/Havcr2/Irf8/Klrk1/Ptpn22/RT1-Db1/Sash3/Txk/Xcl1	15	BP
GO:0072678	T cell migration	12/217	67/17859	2.54541e-11	1.06391e-09	7.92591e-10	Aif1/Ccl5/Ccr6/Cxcr3/Itga4/Itgal/Itgb3/Itgb7/Myo1g/Spn/Tnfrsf14/Xcl1	12	BP
GO:0002699	positive regulation of immune effector process	21/217	277/17859	2.61158e-11	1.07702e-09	8.02351e-10	Blk/C3/Cd226/Cd40/Cd74/Dhx58/Klrd1/Klrk1/Lag3/Mzb1/Nr4a3/Ptpn22/Ptprc/RT1-CE4/RT1-Da/RT1-Db1/RT1-S3/Sash3/Tbx21/Tnfrsf14/Xcl1	21	BP
GO:0045088	regulation of innate immune response	18/217	198/17859	3.69331e-11	1.50308e-09	1.11976e-09	Cd226/Cd96/Dhx58/Fcnb/Havcr2/Irf7/Klrc1/Klrd1/Klrk1/Lag3/Ncf1/Nlrc4/Oas3/RT1-S3/Samhd1/Socs1/Txk/Zbp1	18	BP
GO:0031341	regulation of cell killing	15/217	129/17859	5.04563e-11	2.02677e-09	1.5099e-09	Ccr5/Cd226/Cx3cr1/Havcr2/Klrc1/Klrd1/Klrk1/Lag3/Prf1/Ptprc/RT1-CE4/RT1-Da/RT1-Db1/RT1-S3/Xcl1	15	BP
GO:0002706	regulation of lymphocyte mediated immunity	18/217	205/17859	6.58817e-11	2.58487e-09	1.92566e-09	C3/Cd226/Cd40/Cd96/Havcr2/Klrc1/Klrd1/Klrk1/Lag3/Ptprc/RT1-CE4/RT1-Da/RT1-Db1/RT1-S3/Sash3/Spn/Tbx21/Xcl1	18	BP
GO:0046634	regulation of alpha-beta T cell activation	14/217	110/17859	6.60215e-11	2.58487e-09	1.92566e-09	Adora2a/Cd3e/Ptpn22/Ptprc/RT1-Da/RT1-Db1/RT1-S3/Runx3/Sash3/Socs1/Tbx21/Tnfrsf14/Xcl1/Zap70	14	BP
GO:0034341	response to interferon-gamma	16/217	155/17859	6.96748e-11	2.6938e-09	2.00682e-09	Aif1/Ccl12/Ccl5/Cd40/Cd74/Ciita/Fcar/Gbp4/Irf8/Kynu/RT1-Ba/RT1-Db1/Rab43/Socs1/Txk/Xcl1	16	BP
GO:0002381	immunoglobulin production involved in immunoglobulin-mediated immune response	12/217	73/17859	7.32068e-11	2.79542e-09	2.08252e-09	Ccr6/Cd40/Cd40lg/Gapt/Ptprc/RT1-Ba/RT1-DOa/RT1-DOb/RT1-Da/RT1-Db1/Tbx21/Xcl1	12	BP
GO:0007204	positive regulation of cytosolic calcium ion concentration	23/217	359/17859	8.54111e-11	3.22167e-09	2.40006e-09	C3ar1/Ccr4/Ccr5/Ccr6/Ccr7/Ccr9/Coro1a/Cx3cr1/Cxcl9/Cxcr3/Gpr174/Gpr18/Gpr35/Gpr65/Itgb3/Lck/P2ry10/P2ry6/Ptprc/Tac4/Trpm2/Xcl1/Xcr1	23	BP
GO:1903706	regulation of hemopoiesis	24/217	399/17859	1.1908e-10	4.43751e-09	3.30584e-09	Ccl5/Cd27/Cd40lg/Cd74/Ctla4/Evi2b/Flt3/Gpr171/Ikzf3/Il2ra/Lag3/Lck/Ptprc/RT1-Ba/RT1-DOa/RT1-Da/RT1-Db1/Rhoh/Runx3/Sash3/Socs1/Tbx21/Zap70/Zfp36l2	24	BP
GO:0002833	positive regulation of response to biotic stimulus	16/217	164/17859	1.6341e-10	6.01697e-09	4.4825e-09	Cd226/Cd40lg/Dhx58/Fcnb/Havcr2/Irf7/Klrd1/Klrk1/Lag3/Ly86/Nlrc4/Oasl/RT1-Db1/RT1-S3/Txk/Zbp1	16	BP
GO:0002703	regulation of leukocyte mediated immunity	20/217	276/17859	1.78104e-10	6.48089e-09	4.82811e-09	Blk/C3/Cd226/Cd40/Cd96/Cx3cr1/Havcr2/Klrc1/Klrd1/Klrk1/Lag3/Ptprc/RT1-CE4/RT1-Da/RT1-Db1/RT1-S3/Sash3/Spn/Tbx21/Xcl1	20	BP
GO:0045582	positive regulation of T cell differentiation	13/217	98/17859	1.90096e-10	6.83684e-09	5.09328e-09	Cd27/Cd74/Il2ra/Lck/Ptprc/RT1-Ba/RT1-Da/RT1-Db1/Rhoh/Runx3/Sash3/Socs1/Zap70	13	BP
GO:0002819	regulation of adaptive immune response	18/217	220/17859	2.11214e-10	7.50903e-09	5.59404e-09	C3/Cd226/Cd40/Havcr2/Irf7/Klrc1/Klrd1/Ptprc/RT1-CE4/RT1-Da/RT1-Db1/RT1-S3/Samsn1/Sash3/Spn/Tbx21/Tnfrsf14/Xcl1	18	BP
GO:0022408	negative regulation of cell-cell adhesion	17/217	203/17859	4.76701e-10	1.6755e-08	1.2482e-08	Adora2a/Akna/Cd74/Ctla4/Havcr2/Il2ra/Lag3/Ptpn22/RT1-Ba/RT1-Db1/Runx3/Socs1/Spn/Tbx21/Tnfrsf14/Xcl1/Zc3h12d	17	BP
GO:0001910	regulation of leukocyte mediated cytotoxicity	13/217	106/17859	5.16888e-10	1.79633e-08	1.33822e-08	Cd226/Cx3cr1/Havcr2/Klrc1/Klrd1/Klrk1/Lag3/Ptprc/RT1-CE4/RT1-Da/RT1-Db1/RT1-S3/Xcl1	13	BP
GO:0045058	T cell selection	10/217	52/17859	5.77765e-10	1.98559e-08	1.47921e-08	Ccr7/Cd3d/Cd3e/Cd3g/Cd74/Ly9/Ptprc/Spn/Tbx21/Zap70	10	BP
GO:0043368	positive T cell selection	9/217	38/17859	5.87268e-10	1.99606e-08	1.48702e-08	Cd3d/Cd3e/Cd3g/Cd74/Ly9/Ptprc/Spn/Tbx21/Zap70	9	BP
GO:0002456	T cell mediated immunity	14/217	130/17859	6.34615e-10	2.13355e-08	1.58944e-08	Gzmm/Klrc1/Klrd1/Myo1g/Prf1/Ptprc/RT1-CE4/RT1-Da/RT1-Db1/RT1-S3/Sash3/Spn/Tbx21/Xcl1	14	BP
GO:1902107	positive regulation of leukocyte differentiation	16/217	181/17859	7.10495e-10	2.33783e-08	1.74163e-08	Ccl5/Cd27/Cd40lg/Cd74/Evi2b/Il2ra/Lck/Ptprc/RT1-Ba/RT1-Da/RT1-Db1/Rhoh/Runx3/Sash3/Socs1/Zap70	16	BP
GO:1903708	positive regulation of hemopoiesis	16/217	181/17859	7.10495e-10	2.33783e-08	1.74163e-08	Ccl5/Cd27/Cd40lg/Cd74/Evi2b/Il2ra/Lck/Ptprc/RT1-Ba/RT1-Da/RT1-Db1/Rhoh/Runx3/Sash3/Socs1/Zap70	16	BP
GO:0045061	thymic T cell selection	8/217	27/17859	7.60175e-10	2.47497e-08	1.84379e-08	Ccr7/Cd3d/Cd3e/Cd3g/Cd74/Ptprc/Spn/Zap70	8	BP
GO:0031343	positive regulation of cell killing	12/217	89/17859	7.97117e-10	2.56821e-08	1.91326e-08	Ccr5/Cd226/Klrd1/Klrk1/Lag3/Prf1/Ptprc/RT1-CE4/RT1-Da/RT1-Db1/RT1-S3/Xcl1	12	BP
GO:0002687	positive regulation of leukocyte migration	15/217	157/17859	8.32555e-10	2.65473e-08	1.97771e-08	Aif1/C3ar1/Ccl12/Ccl5/Ccr6/Ccr7/Cd74/Cx3cr1/Itga4/Itgb3/P2ry12/Sell/Spn/Tnfrsf14/Xcl1	15	BP
GO:0050920	regulation of chemotaxis	18/217	240/17859	8.68527e-10	2.74118e-08	2.04211e-08	Aif1/C3ar1/Ccl5/Ccr4/Ccr6/Ccr7/Cd74/Cx3cr1/Cxcl9/Cxcr3/Gpr18/Klrk1/Ntf3/P2ry12/Padi2/Sell/Sema4f/Xcl1	18	BP
GO:0046635	positive regulation of alpha-beta T cell activation	11/217	71/17859	8.94239e-10	2.79382e-08	2.08133e-08	Cd3e/Ptpn22/Ptprc/RT1-Da/RT1-Db1/RT1-S3/Runx3/Sash3/Socs1/Xcl1/Zap70	11	BP
GO:0051480	regulation of cytosolic calcium ion concentration	23/217	409/17859	1.10339e-09	3.41279e-08	2.54244e-08	C3ar1/Ccr4/Ccr5/Ccr6/Ccr7/Ccr9/Coro1a/Cx3cr1/Cxcl9/Cxcr3/Gpr174/Gpr18/Gpr35/Gpr65/Itgb3/Lck/P2ry10/P2ry6/Ptprc/Tac4/Trpm2/Xcl1/Xcr1	23	BP
GO:0045621	positive regulation of lymphocyte differentiation	13/217	114/17859	1.29246e-09	3.95801e-08	2.94862e-08	Cd27/Cd74/Il2ra/Lck/Ptprc/RT1-Ba/RT1-Da/RT1-Db1/Rhoh/Runx3/Sash3/Socs1/Zap70	13	BP
GO:0002708	positive regulation of lymphocyte mediated immunity	14/217	142/17859	2.04758e-09	6.20899e-08	4.62555e-08	C3/Cd226/Cd40/Klrd1/Klrk1/Lag3/Ptprc/RT1-CE4/RT1-Da/RT1-Db1/RT1-S3/Sash3/Tbx21/Xcl1	14	BP
GO:0050777	negative regulation of immune response	16/217	197/17859	2.45868e-09	7.3832e-08	5.50031e-08	Cd96/Ctla4/Dhx58/Havcr2/Klrc1/Klrd1/Oas3/Ptprc/RT1-Db1/RT1-S3/Samhd1/Samsn1/Spn/Tbx21/Tnfrsf14/Xcl1	16	BP
GO:0035589	G protein-coupled purinergic nucleotide receptor signaling pathway	6/217	12/17859	2.61128e-09	7.76606e-08	5.78553e-08	Gpr171/P2ry10/P2ry12/P2ry13/P2ry14/P2ry6	6	BP
GO:0002366	leukocyte activation involved in immune response	19/217	293/17859	3.3126e-09	9.75798e-08	7.26946e-08	Blk/Ccr6/Cd40/Cd40lg/Cd74/Coro1a/Cx3cr1/Gapt/Havcr2/Irf8/Itgal/Ly9/Nr4a3/Ptprc/RT1-Da/RT1-Db1/Spn/Tac4/Tbx21	19	BP
GO:0002478	antigen processing and presentation of exogenous peptide antigen	8/217	32/17859	3.41833e-09	9.97444e-08	7.43071e-08	Cd74/Clec4a3/RT1-Ba/RT1-DOa/RT1-DOb/RT1-Da/RT1-Db1/RT1-S3	8	BP
GO:0002700	regulation of production of molecular mediator of immune response	15/217	174/17859	3.4791e-09	1.00569e-07	7.49212e-08	Cd22/Cd226/Cd40/Cd40lg/Cd74/Cd96/Mzb1/Nr4a3/Ptpn22/Ptprc/RT1-S3/Sash3/Tbx21/Tnfrsf14/Xcl1	15	BP
GO:0071675	regulation of mononuclear cell migration	13/217	124/17859	3.67804e-09	1.05335e-07	7.84721e-08	Aif1/C3ar1/Ccl5/Ccr6/Ccr7/Cx3cr1/Itga4/Itgb3/Klrk1/Padi2/Spn/Tnfrsf14/Xcl1	13	BP
GO:0002263	cell activation involved in immune response	19/217	297/17859	4.14089e-09	1.17502e-07	8.75365e-08	Blk/Ccr6/Cd40/Cd40lg/Cd74/Coro1a/Cx3cr1/Gapt/Havcr2/Irf8/Itgal/Ly9/Nr4a3/Ptprc/RT1-Da/RT1-Db1/Spn/Tac4/Tbx21	19	BP
GO:0002507	tolerance induction	8/217	33/17859	4.46533e-09	1.24852e-07	9.30119e-08	Blk/C3/C3ar1/Ccr4/Cd3e/Havcr2/Il2ra/RT1-S3	8	BP
GO:0050852	T cell receptor signaling pathway	13/217	126/17859	4.48063e-09	1.24852e-07	9.30119e-08	Ccr7/Cd226/Cd247/Cd3e/Ctla4/Lck/Ptpn22/Ptprc/RT1-Db1/Sla2/Spn/Txk/Zap70	13	BP
GO:0032640	tumor necrosis factor production	15/217	179/17859	5.13547e-09	1.40567e-07	1.04719e-07	Ccr5/Cd2/Clec4a3/Cx3cr1/Flt3/Gpr18/Havcr2/Oas2/Oas3/Ptpn22/Ptprc/RT1-S3/Sash3/Spn/Tlr1	15	BP
GO:0032680	regulation of tumor necrosis factor production	15/217	179/17859	5.13547e-09	1.40567e-07	1.04719e-07	Ccr5/Cd2/Clec4a3/Cx3cr1/Flt3/Gpr18/Havcr2/Oas2/Oas3/Ptpn22/Ptprc/RT1-S3/Sash3/Spn/Tlr1	15	BP
GO:0032729	positive regulation of interferon-gamma production	11/217	84/17859	5.6505e-09	1.53247e-07	1.14165e-07	Cd2/Cd226/Cd3e/Cd40lg/Flt3/Havcr2/Irf8/Klrk1/Ptpn22/Sash3/Txk	11	BP
GO:0001913	T cell mediated cytotoxicity	10/217	65/17859	5.69783e-09	1.53247e-07	1.14165e-07	Gzmm/Klrc1/Klrd1/Prf1/Ptprc/RT1-CE4/RT1-Da/RT1-Db1/RT1-S3/Xcl1	10	BP
GO:0071706	tumor necrosis factor superfamily cytokine production	15/217	182/17859	6.44733e-09	1.70441e-07	1.26974e-07	Ccr5/Cd2/Clec4a3/Cx3cr1/Flt3/Gpr18/Havcr2/Oas2/Oas3/Ptpn22/Ptprc/RT1-S3/Sash3/Spn/Tlr1	15	BP
GO:1903555	regulation of tumor necrosis factor superfamily cytokine production	15/217	182/17859	6.44733e-09	1.70441e-07	1.26974e-07	Ccr5/Cd2/Clec4a3/Cx3cr1/Flt3/Gpr18/Havcr2/Oas2/Oas3/Ptpn22/Ptprc/RT1-S3/Sash3/Spn/Tlr1	15	BP
GO:2000401	regulation of lymphocyte migration	10/217	67/17859	7.72825e-09	2.02572e-07	1.50911e-07	Aif1/Ccl5/Ccr6/Itga4/Itgb3/Klrk1/Padi2/Spn/Tnfrsf14/Xcl1	10	BP
GO:0045060	negative thymic T cell selection	6/217	14/17859	8.31578e-09	2.1614e-07	1.61019e-07	Ccr7/Cd3e/Cd74/Ptprc/Spn/Zap70	6	BP
GO:0019882	antigen processing and presentation	12/217	110/17859	9.44528e-09	2.43452e-07	1.81366e-07	Ccr7/Cd74/Clec4a3/Flt3/Psmb9/RT1-Ba/RT1-CE4/RT1-DOa/RT1-DOb/RT1-Da/RT1-Db1/RT1-S3	12	BP
GO:0050921	positive regulation of chemotaxis	14/217	160/17859	9.6998e-09	2.47946e-07	1.84714e-07	Aif1/C3ar1/Ccl5/Ccr4/Ccr6/Ccr7/Cd74/Cx3cr1/Cxcl9/Cxcr3/Ntf3/P2ry12/Sell/Xcl1	14	BP
GO:0043383	negative T cell selection	6/217	15/17859	1.37194e-08	3.44053e-07	2.56311e-07	Ccr7/Cd3e/Cd74/Ptprc/Spn/Zap70	6	BP
GO:0030888	regulation of B cell proliferation	10/217	71/17859	1.37933e-08	3.44053e-07	2.56311e-07	Blk/Cd22/Cd40/Cd40lg/Cd74/Ctla4/Ikzf3/Mzb1/Ptprc/Sash3	10	BP
GO:0071677	positive regulation of mononuclear cell migration	10/217	71/17859	1.37933e-08	3.44053e-07	2.56311e-07	Aif1/Ccl5/Ccr6/Ccr7/Cx3cr1/Itga4/Itgb3/Spn/Tnfrsf14/Xcl1	10	BP
GO:0032102	negative regulation of response to external stimulus	21/217	392/17859	1.42388e-08	3.52326e-07	2.62474e-07	Adora2a/Aif1/Alox5/Aoah/Cd96/Cx3cr1/Dhx58/Gpr18/Gpr31/Havcr2/Il2ra/Klrc1/Klrd1/Klrk1/Oas3/Padi2/RT1-Db1/RT1-S3/Samhd1/Sema4f/Spn	21	BP
GO:0019884	antigen processing and presentation of exogenous antigen	8/217	38/17859	1.49283e-08	3.66453e-07	2.72999e-07	Cd74/Clec4a3/RT1-Ba/RT1-DOa/RT1-DOb/RT1-Da/RT1-Db1/RT1-S3	8	BP
GO:0002705	positive regulation of leukocyte mediated immunity	14/217	166/17859	1.55682e-08	3.79153e-07	2.8246e-07	C3/Cd226/Cd40/Klrd1/Klrk1/Lag3/Ptprc/RT1-CE4/RT1-Da/RT1-Db1/RT1-S3/Sash3/Tbx21/Xcl1	14	BP
GO:0031348	negative regulation of defense response	16/217	228/17859	1.99629e-08	4.82386e-07	3.59366e-07	Adora2a/Alox5/Aoah/Cd96/Cx3cr1/Dhx58/Gpr31/Havcr2/Il2ra/Klrc1/Klrd1/Oas3/RT1-Db1/RT1-S3/Samhd1/Spn	16	BP
GO:0002704	negative regulation of leukocyte mediated immunity	10/217	74/17859	2.07907e-08	4.98494e-07	3.71366e-07	Cd96/Cx3cr1/Havcr2/Klrc1/Klrd1/Ptprc/RT1-S3/Spn/Tbx21/Xcl1	10	BP
GO:0045059	positive thymic T cell selection	6/217	16/17859	2.1729e-08	5.16984e-07	3.85141e-07	Cd3d/Cd3e/Cd3g/Cd74/Ptprc/Zap70	6	BP
GO:0002285	lymphocyte activation involved in immune response	15/217	202/17859	2.64212e-08	6.23823e-07	4.64733e-07	Ccr6/Cd40/Cd40lg/Cd74/Coro1a/Gapt/Havcr2/Irf8/Itgal/Ly9/Ptprc/RT1-Da/RT1-Db1/Spn/Tbx21	15	BP
GO:0006909	phagocytosis	16/217	233/17859	2.70958e-08	6.34904e-07	4.72988e-07	Aif1/C3/Coro1a/Fcnb/Havcr1/Icam5/Il2rb/Irf8/Itgb3/Myo1g/Ncf4/P2ry6/Pld4/Ptprc/Rhoh/Siglec1	16	BP
GO:0042742	defense response to bacterium	18/217	300/17859	2.90366e-08	6.75265e-07	5.03056e-07	Ccr5/Gbp4/Havcr2/Irf8/Klrk1/Mpeg1/Ncf1/Nlrc4/Oas2/Oas3/Plac8/RGD1359449/RT1-S3/Rnase6/Slamf9/Spn/Tlr5/Tnfrsf14	18	BP
GO:0019932	second-messenger-mediated signaling	19/217	336/17859	3.05262e-08	7.0461e-07	5.24917e-07	Ccr4/Ccr5/Ccr6/Ccr7/Ccr9/Cd22/Cd3e/Cx3cr1/Cxcr3/Efhb/Itgal/P2ry12/Ptgdr2/Ptprc/Sla2/Tbc1d10c/Trpm2/Xcr1/Zap70	19	BP
GO:0002822	regulation of adaptive immune response based on somatic recombination of immune receptors built from immunoglobulin superfamily domains	15/217	207/17859	3.66245e-08	8.39108e-07	6.25116e-07	C3/Cd226/Cd40/Havcr2/Klrc1/Klrd1/Ptprc/RT1-CE4/RT1-Da/RT1-Db1/RT1-S3/Sash3/Spn/Tbx21/Xcl1	15	BP
GO:0007162	negative regulation of cell adhesion	18/217	306/17859	3.93044e-08	8.92844e-07	6.65148e-07	Adora2a/Akna/Cd74/Ctla4/Havcr2/Il2ra/Lag3/Ptpn22/Ptprc/RT1-Ba/RT1-Db1/Runx3/Socs1/Spn/Tbx21/Tnfrsf14/Xcl1/Zc3h12d	18	BP
GO:0001912	positive regulation of leukocyte mediated cytotoxicity	10/217	79/17859	3.95473e-08	8.92844e-07	6.65148e-07	Cd226/Klrd1/Klrk1/Lag3/Ptprc/RT1-CE4/RT1-Da/RT1-Db1/RT1-S3/Xcl1	10	BP
GO:0002709	regulation of T cell mediated immunity	11/217	101/17859	4.03703e-08	8.98312e-07	6.69221e-07	Klrc1/Klrd1/Ptprc/RT1-CE4/RT1-Da/RT1-Db1/RT1-S3/Sash3/Spn/Tbx21/Xcl1	11	BP
GO:0070664	negative regulation of leukocyte proliferation	11/217	101/17859	4.03703e-08	8.98312e-07	6.69221e-07	Blk/Ccl12/Ctla4/Havcr2/Il2ra/RT1-Ba/RT1-Db1/Spn/Tnfrsf14/Xcl1/Zc3h12d	11	BP
GO:0002702	positive regulation of production of molecular mediator of immune response	12/217	126/17859	4.40997e-08	9.74288e-07	7.25821e-07	Cd226/Cd40/Cd74/Mzb1/Nr4a3/Ptpn22/Ptprc/RT1-S3/Sash3/Tbx21/Tnfrsf14/Xcl1	12	BP
GO:0002707	negative regulation of lymphocyte mediated immunity	9/217	61/17859	4.90519e-08	1.07601e-06	8.01603e-07	Cd96/Havcr2/Klrc1/Klrd1/Ptprc/RT1-S3/Spn/Tbx21/Xcl1	9	BP
GO:0042100	B cell proliferation	11/217	103/17859	4.95971e-08	1.08031e-06	8.04803e-07	Blk/Cd22/Cd40/Cd40lg/Cd74/Ctla4/Gapt/Ikzf3/Mzb1/Ptprc/Sash3	11	BP
GO:0002820	negative regulation of adaptive immune response	9/217	63/17859	6.55528e-08	1.40802e-06	1.04894e-06	Havcr2/Klrc1/Klrd1/Ptprc/Samsn1/Spn/Tbx21/Tnfrsf14/Xcl1	9	BP
GO:0050854	regulation of antigen receptor-mediated signaling pathway	9/217	63/17859	6.55528e-08	1.40802e-06	1.04894e-06	Blk/Ccr7/Cd22/Cd226/Lck/Prkcb/Ptpn22/Ptprc/Sla2	9	BP
GO:0002688	regulation of leukocyte chemotaxis	12/217	131/17859	6.81371e-08	1.45344e-06	1.08277e-06	Aif1/C3ar1/Ccl5/Ccr6/Ccr7/Cd74/Cx3cr1/Gpr18/Klrk1/Padi2/Sell/Xcl1	12	BP
GO:0002274	myeloid leukocyte activation	16/217	250/17859	7.2322e-08	1.53214e-06	1.14141e-06	Aif1/Batf3/Blk/Ccl5/Cd226/Cx3cr1/Fcar/Fcgr3a/Havcr1/Havcr2/Klrk1/Nr4a3/Rhoh/Spn/Tac4/Tlr1	16	BP
GO:0048002	antigen processing and presentation of peptide antigen	9/217	65/17859	8.66976e-08	1.82419e-06	1.35898e-06	Cd74/Clec4a3/RT1-Ba/RT1-CE4/RT1-DOa/RT1-DOb/RT1-Da/RT1-Db1/RT1-S3	9	BP
GO:0071219	cellular response to molecule of bacterial origin	18/217	323/17859	8.91502e-08	1.86312e-06	1.38798e-06	Ankrd1/Ccl5/Ccr5/Cd40/Cd6/Cx3cr1/Cxcl9/Fcar/Fcgr3a/Havcr2/Irf8/Klrk1/Kmo/Ly86/Mir146a/Ptpn22/Tlr1/Tlr5	18	BP
GO:0036037	CD8-positive, alpha-beta T cell activation	7/217	32/17859	9.22988e-08	1.9032e-06	1.41784e-06	Clec4a3/Gpr18/Ptpn22/RT1-S3/Runx3/Socs1/Xcl1	7	BP
GO:2000406	positive regulation of T cell migration	7/217	32/17859	9.22988e-08	1.9032e-06	1.41784e-06	Aif1/Ccl5/Itga4/Itgb3/Spn/Tnfrsf14/Xcl1	7	BP
GO:0097028	dendritic cell differentiation	8/217	48/17859	1.0378e-07	2.11178e-06	1.57323e-06	Batf3/Blk/Ccr7/Cd40lg/Flt3/Irf8/Slamf9/Trpm2	8	BP
GO:2000404	regulation of T cell migration	8/217	48/17859	1.0378e-07	2.11178e-06	1.57323e-06	Aif1/Ccl5/Ccr6/Itga4/Itgb3/Spn/Tnfrsf14/Xcl1	8	BP
GO:0035590	purinergic nucleotide receptor signaling pathway	7/217	33/17859	1.15946e-07	2.34393e-06	1.74617e-06	Adora2a/Gpr171/P2ry10/P2ry12/P2ry13/P2ry14/P2ry6	7	BP
GO:0019886	antigen processing and presentation of exogenous peptide antigen via MHC class II	6/217	21/17859	1.39947e-07	2.81075e-06	2.09394e-06	Cd74/RT1-Ba/RT1-DOa/RT1-DOb/RT1-Da/RT1-Db1	6	BP
GO:0033077	T cell differentiation in thymus	10/217	91/17859	1.55415e-07	3.10128e-06	2.31038e-06	Ccr6/Ccr7/Cd3d/Cd3e/Cd3g/Cd74/Ptprc/Spn/Zap70/Zfp36l2	10	BP
GO:0031349	positive regulation of defense response	16/217	267/17859	1.78388e-07	3.53688e-06	2.63489e-06	C3/Ccl5/Ccr5/Ccr7/Cd226/Cd74/Fcnb/Havcr2/Irf7/Klrd1/Klrk1/Lag3/Nlrc4/RT1-S3/Txk/Zbp1	16	BP
GO:0002399	MHC class II protein complex assembly	5/217	12/17859	1.86904e-07	3.65882e-06	2.72573e-06	RT1-Ba/RT1-DOa/RT1-DOb/RT1-Da/RT1-Db1	5	BP
GO:0002503	peptide antigen assembly with MHC class II protein complex	5/217	12/17859	1.86904e-07	3.65882e-06	2.72573e-06	RT1-Ba/RT1-DOa/RT1-DOb/RT1-Da/RT1-Db1	5	BP
GO:0002228	natural killer cell mediated immunity	9/217	71/17859	1.89645e-07	3.68913e-06	2.74831e-06	Cd226/Cd96/Coro1a/Havcr2/Klrc1/Klrd1/Klrk1/Lag3/RT1-S3	9	BP
GO:0001914	regulation of T cell mediated cytotoxicity	8/217	52/17859	1.98513e-07	3.83751e-06	2.85885e-06	Klrc1/Klrd1/Ptprc/RT1-CE4/RT1-Da/RT1-Db1/RT1-S3/Xcl1	8	BP
GO:0051607	defense response to virus	15/217	238/17859	2.28617e-07	4.36489e-06	3.25173e-06	Cd40/Cxcl9/Dhx58/Irf7/Oas2/Oas3/Oasl/Prf1/Ptpn22/Ptprc/Rnase6/Samhd1/Spn/Tagap/Zbp1	15	BP
GO:0140546	defense response to symbiont	15/217	238/17859	2.28617e-07	4.36489e-06	3.25173e-06	Cd40/Cxcl9/Dhx58/Irf7/Oas2/Oas3/Oasl/Prf1/Ptpn22/Ptprc/Rnase6/Samhd1/Spn/Tagap/Zbp1	15	BP
GO:0050853	B cell receptor signaling pathway	8/217	53/17859	2.31381e-07	4.39055e-06	3.27086e-06	Blk/Cd22/Cd79b/Ctla4/Klhl6/Lck/Prkcb/Ptprc	8	BP
GO:0050672	negative regulation of lymphocyte proliferation	10/217	95/17859	2.3425e-07	4.4179e-06	3.29123e-06	Blk/Ctla4/Havcr2/Il2ra/RT1-Ba/RT1-Db1/Spn/Tnfrsf14/Xcl1/Zc3h12d	10	BP
GO:0045089	positive regulation of innate immune response	11/217	120/17859	2.41008e-07	4.5178e-06	3.36565e-06	Cd226/Fcnb/Havcr2/Irf7/Klrd1/Klrk1/Lag3/Nlrc4/RT1-S3/Txk/Zbp1	11	BP
GO:0032945	negative regulation of mononuclear cell proliferation	10/217	96/17859	2.58742e-07	4.82101e-06	3.59154e-06	Blk/Ctla4/Havcr2/Il2ra/RT1-Ba/RT1-Db1/Spn/Tnfrsf14/Xcl1/Zc3h12d	10	BP
GO:0071216	cellular response to biotic stimulus	18/217	349/17859	2.82223e-07	5.21612e-06	3.88588e-06	Ankrd1/Ccl5/Ccr5/Cd40/Cd6/Cx3cr1/Cxcl9/Fcar/Fcgr3a/Havcr2/Irf8/Klrk1/Kmo/Ly86/Mir146a/Ptpn22/Tlr1/Tlr5	18	BP
GO:0071222	cellular response to lipopolysaccharide	17/217	312/17859	2.8332e-07	5.21612e-06	3.88588e-06	Ankrd1/Ccl5/Ccr5/Cd40/Cd6/Cx3cr1/Cxcl9/Fcar/Fcgr3a/Havcr2/Irf8/Klrk1/Kmo/Ly86/Mir146a/Ptpn22/Tlr5	17	BP
GO:0050727	regulation of inflammatory response	18/217	350/17859	2.94363e-07	5.38736e-06	4.01346e-06	Adora2a/Akna/Alox5/Aoah/C3/Ccl5/Ccr5/Ccr7/Cd74/Cx3cr1/Gpr31/Il2ra/Ncf1/RT1-Db1/RT1-S3/Spn/Xcl1/Zbp1	18	BP
GO:0002715	regulation of natural killer cell mediated immunity	8/217	55/17859	3.11298e-07	5.6638e-06	4.2194e-06	Cd226/Cd96/Havcr2/Klrc1/Klrd1/Klrk1/Lag3/RT1-S3	8	BP
GO:0046641	positive regulation of alpha-beta T cell proliferation	6/217	24/17859	3.36708e-07	6.09027e-06	4.53711e-06	Cd3e/Ptpn22/Ptprc/RT1-S3/Xcl1/Zap70	6	BP
GO:0002698	negative regulation of immune effector process	11/217	125/17859	3.65155e-07	6.52846e-06	4.86355e-06	Cd22/Cd96/Cx3cr1/Havcr2/Klrc1/Klrd1/Ptprc/RT1-S3/Spn/Tbx21/Xcl1	11	BP
GO:0051209	release of sequestered calcium ion into cytosol	11/217	125/17859	3.65155e-07	6.52846e-06	4.86355e-06	Ccr5/Coro1a/Cxcl9/Cxcr3/Itgb3/Lck/P2ry6/Ptprc/Trpm2/Xcl1/Xcr1	11	BP
GO:0002367	cytokine production involved in immune response	10/217	100/17859	3.80649e-07	6.76637e-06	5.04078e-06	Cd226/Cd74/Cd96/Nr4a3/RT1-S3/Sash3/Slamf9/Tbx21/Tnfrsf14/Xcl1	10	BP
GO:2000403	positive regulation of lymphocyte migration	7/217	39/17859	3.92407e-07	6.91757e-06	5.15342e-06	Aif1/Ccl5/Itga4/Itgb3/Spn/Tnfrsf14/Xcl1	7	BP
GO:0046632	alpha-beta T cell differentiation	11/217	126/17859	3.95865e-07	6.91757e-06	5.15342e-06	Gpr18/Ly9/RT1-Da/RT1-Db1/Runx3/Sash3/Socs1/Spn/Tbx21/Txk/Zap70	11	BP
GO:0051283	negative regulation of sequestering of calcium ion	11/217	126/17859	3.95865e-07	6.91757e-06	5.15342e-06	Ccr5/Coro1a/Cxcl9/Cxcr3/Itgb3/Lck/P2ry6/Ptprc/Trpm2/Xcl1/Xcr1	11	BP
GO:0071346	cellular response to interferon-gamma	11/217	127/17859	4.28834e-07	7.45159e-06	5.55126e-06	Aif1/Ccl12/Ccl5/Ciita/Fcar/Gbp4/Irf8/Rab43/Socs1/Txk/Xcl1	11	BP
GO:0042130	negative regulation of T cell proliferation	9/217	78/17859	4.31477e-07	7.45564e-06	5.55427e-06	Ctla4/Havcr2/Il2ra/RT1-Ba/RT1-Db1/Spn/Tnfrsf14/Xcl1/Zc3h12d	9	BP
GO:0002495	antigen processing and presentation of peptide antigen via MHC class II	6/217	25/17859	4.38562e-07	7.53595e-06	5.6141e-06	Cd74/RT1-Ba/RT1-DOa/RT1-DOb/RT1-Da/RT1-Db1	6	BP
GO:0002501	peptide antigen assembly with MHC protein complex	5/217	14/17859	4.63164e-07	7.88895e-06	5.87708e-06	RT1-Ba/RT1-DOa/RT1-DOb/RT1-Da/RT1-Db1	5	BP
GO:0051282	regulation of sequestering of calcium ion	11/217	128/17859	4.64206e-07	7.88895e-06	5.87708e-06	Ccr5/Coro1a/Cxcl9/Cxcr3/Itgb3/Lck/P2ry6/Ptprc/Trpm2/Xcl1/Xcr1	11	BP
GO:0046640	regulation of alpha-beta T cell proliferation	7/217	40/17859	4.70767e-07	7.95674e-06	5.92758e-06	Cd3e/Ptpn22/Ptprc/RT1-S3/Tnfrsf14/Xcl1/Zap70	7	BP
GO:0051208	sequestering of calcium ion	11/217	130/17859	5.42762e-07	9.12371e-06	6.79694e-06	Ccr5/Coro1a/Cxcl9/Cxcr3/Itgb3/Lck/P2ry6/Ptprc/Trpm2/Xcl1/Xcr1	11	BP
GO:0002710	negative regulation of T cell mediated immunity	6/217	26/17859	5.64373e-07	9.43571e-06	7.02938e-06	Klrc1/Klrd1/Ptprc/Spn/Tbx21/Xcl1	6	BP
GO:0002396	MHC protein complex assembly	5/217	15/17859	6.87887e-07	1.13777e-05	8.47613e-06	RT1-Ba/RT1-DOa/RT1-DOb/RT1-Da/RT1-Db1	5	BP
GO:0002468	dendritic cell antigen processing and presentation	5/217	15/17859	6.87887e-07	1.13777e-05	8.47613e-06	Ccr7/Cd74/Clec4a3/RT1-Da/RT1-Db1	5	BP
GO:0001911	negative regulation of leukocyte mediated cytotoxicity	6/217	27/17859	7.18297e-07	1.1755e-05	8.75718e-06	Cx3cr1/Havcr2/Klrc1/Klrd1/Ptprc/RT1-S3	6	BP
GO:0002504	antigen processing and presentation of peptide or polysaccharide antigen via MHC class II	6/217	27/17859	7.18297e-07	1.1755e-05	8.75718e-06	Cd74/RT1-Ba/RT1-DOa/RT1-DOb/RT1-Da/RT1-Db1	6	BP
GO:0046633	alpha-beta T cell proliferation	7/217	43/17859	7.88922e-07	1.28149e-05	9.5468e-06	Cd3e/Ptpn22/Ptprc/RT1-S3/Tnfrsf14/Xcl1/Zap70	7	BP
GO:0002221	pattern recognition receptor signaling pathway	12/217	164/17859	7.91351e-07	1.28149e-05	9.5468e-06	Cd40/Dhx58/Fcnb/Havcr2/Irf7/LOC681325/Oas3/Oasl/Ptpn22/Tlr1/Tlr12/Tlr5	12	BP
GO:0002637	regulation of immunoglobulin production	9/217	85/17859	9.05166e-07	1.45817e-05	1.0863e-05	Cd22/Cd40/Cd40lg/Mzb1/Ptprc/RT1-S3/Sash3/Tbx21/Xcl1	9	BP
GO:0032760	positive regulation of tumor necrosis factor production	10/217	110/17859	9.27977e-07	1.48717e-05	1.1079e-05	Ccr5/Cd2/Havcr2/Oas2/Oas3/Ptprc/RT1-S3/Sash3/Spn/Tlr1	10	BP
GO:0002824	positive regulation of adaptive immune response based on somatic recombination of immune receptors built from immunoglobulin superfamily domains	11/217	138/17859	9.87034e-07	1.57366e-05	1.17234e-05	C3/Cd226/Cd40/Ptprc/RT1-CE4/RT1-Da/RT1-Db1/RT1-S3/Sash3/Tbx21/Xcl1	11	BP
GO:2000106	regulation of leukocyte apoptotic process	10/217	111/17859	1.00915e-06	1.60067e-05	1.19246e-05	Blk/Ccl5/Ccr5/Cd27/Cd3g/Cd74/Fcar/Hsh2d/Nr4a3/Siglec1	10	BP
GO:1903557	positive regulation of tumor necrosis factor superfamily cytokine production	10/217	112/17859	1.09646e-06	1.73028e-05	1.28902e-05	Ccr5/Cd2/Havcr2/Oas2/Oas3/Ptprc/RT1-S3/Sash3/Spn/Tlr1	10	BP
GO:0071887	leukocyte apoptotic process	11/217	140/17859	1.13887e-06	1.78808e-05	1.33208e-05	Blk/Ccl5/Ccr5/Cd27/Cd3g/Cd74/Fcar/Hsh2d/Il2ra/Nr4a3/Siglec1	11	BP
GO:0002821	positive regulation of adaptive immune response	11/217	142/17859	1.31089e-06	2.04777e-05	1.52554e-05	C3/Cd226/Cd40/Ptprc/RT1-CE4/RT1-Da/RT1-Db1/RT1-S3/Sash3/Tbx21/Xcl1	11	BP
GO:0042267	natural killer cell mediated cytotoxicity	8/217	68/17859	1.65066e-06	2.56558e-05	1.9113e-05	Cd226/Coro1a/Havcr2/Klrc1/Klrd1/Klrk1/Lag3/RT1-S3	8	BP
GO:0002418	immune response to tumor cell	6/217	31/17859	1.71562e-06	2.6532e-05	1.97657e-05	Cd226/Cd40lg/Havcr2/Klrk1/Prf1/RT1-Db1	6	BP
GO:0002431	Fc receptor mediated stimulatory signaling pathway	5/217	18/17859	1.90511e-06	2.91708e-05	2.17315e-05	Blk/Cd226/Myo1g/Nr4a3/Ptprc	5	BP
GO:0042492	gamma-delta T cell differentiation	5/217	18/17859	1.90511e-06	2.91708e-05	2.17315e-05	Ccr9/Gpr18/Klrc1/Lck/Ptprc	5	BP
GO:0045824	negative regulation of innate immune response	8/217	70/17859	2.06465e-06	3.1458e-05	2.34354e-05	Cd96/Dhx58/Havcr2/Klrc1/Klrd1/Oas3/RT1-S3/Samhd1	8	BP
GO:0002714	positive regulation of B cell mediated immunity	7/217	50/17859	2.27535e-06	3.41634e-05	2.54509e-05	C3/Cd226/Cd40/Ptprc/RT1-S3/Tbx21/Xcl1	7	BP
GO:0002891	positive regulation of immunoglobulin mediated immune response	7/217	50/17859	2.27535e-06	3.41634e-05	2.54509e-05	C3/Cd226/Cd40/Ptprc/RT1-S3/Tbx21/Xcl1	7	BP
GO:0061756	leukocyte adhesion to vascular endothelial cell	7/217	50/17859	2.27535e-06	3.41634e-05	2.54509e-05	Alox5/Cx3cr1/Itga4/Itgb7/Sell/Selplg/Spn	7	BP
GO:0097553	calcium ion transmembrane import into cytosol	11/217	151/17859	2.40037e-06	3.58665e-05	2.67197e-05	Ccr5/Coro1a/Cxcl9/Cxcr3/Itgb3/Lck/P2ry6/Ptprc/Trpm2/Xcl1/Xcr1	11	BP
GO:2001185	regulation of CD8-positive, alpha-beta T cell activation	5/217	19/17859	2.56e-06	3.80677e-05	2.83595e-05	Ptpn22/RT1-S3/Runx3/Socs1/Xcl1	5	BP
GO:0001959	regulation of cytokine-mediated signaling pathway	10/217	123/17859	2.58812e-06	3.83016e-05	2.85338e-05	Ccl5/Cd74/Irf7/Oas3/Padi2/Ptprc/Samhd1/Socs1/Txk/Zbp1	10	BP
GO:0006816	calcium ion transport	19/217	451/17859	2.74403e-06	4.04156e-05	3.01087e-05	Adora2a/Ccl12/Ccl5/Ccr5/Coro1a/Cxcl9/Cxcr3/Efhb/Gpr35/Itgb3/Lck/P2ry12/P2ry6/Prkcb/Ptpn22/Ptprc/Trpm2/Xcl1/Xcr1	19	BP
GO:0002718	regulation of cytokine production involved in immune response	9/217	97/17859	2.77036e-06	4.061e-05	3.02535e-05	Cd226/Cd74/Cd96/Nr4a3/RT1-S3/Sash3/Tbx21/Tnfrsf14/Xcl1	9	BP
GO:0001818	negative regulation of cytokine production	15/217	291/17859	2.87958e-06	4.2012e-05	3.12979e-05	Ccr7/Cd96/Clec4a3/Cx3cr1/Dhx58/Flt3/Gpr18/Havcr2/Lag3/Oas3/Ptpn22/Ptprc/RT1-Db1/Tbx21/Xcl1	15	BP
GO:0042269	regulation of natural killer cell mediated cytotoxicity	7/217	52/17859	2.9855e-06	4.33529e-05	3.22969e-05	Cd226/Havcr2/Klrc1/Klrd1/Klrk1/Lag3/RT1-S3	7	BP
GO:1990266	neutrophil migration	10/217	127/17859	3.45884e-06	4.99915e-05	3.72425e-05	C3ar1/Ccl12/Ccl5/Ccr7/Cd74/Cxcl9/Prex1/Rhoh/Sell/Xcl1	10	BP
GO:0031342	negative regulation of cell killing	6/217	35/17859	3.63187e-06	5.15293e-05	3.83881e-05	Cx3cr1/Havcr2/Klrc1/Klrd1/Ptprc/RT1-S3	6	BP
GO:0032633	interleukin-4 production	6/217	35/17859	3.63187e-06	5.15293e-05	3.83881e-05	Cd3e/Cd40lg/Havcr2/RT1-Db1/RT1-S3/Sash3	6	BP
GO:0032673	regulation of interleukin-4 production	6/217	35/17859	3.63187e-06	5.15293e-05	3.83881e-05	Cd3e/Cd40lg/Havcr2/RT1-Db1/RT1-S3/Sash3	6	BP
GO:0050901	leukocyte tethering or rolling	6/217	35/17859	3.63187e-06	5.15293e-05	3.83881e-05	Cx3cr1/Itga4/Itgb7/Sell/Selplg/Spn	6	BP
GO:0097529	myeloid leukocyte migration	13/217	224/17859	3.7187e-06	5.25202e-05	3.91263e-05	Aif1/C3ar1/Ccl12/Ccl5/Ccr7/Cd74/Cx3cr1/Cxcl9/P2ry12/Prex1/Rhoh/Sell/Xcl1	13	BP
GO:2001187	positive regulation of CD8-positive, alpha-beta T cell activation	4/217	10/17859	4.20472e-06	5.89662e-05	4.39284e-05	Ptpn22/RT1-S3/Runx3/Xcl1	4	BP
GO:0030593	neutrophil chemotaxis	9/217	102/17859	4.21323e-06	5.89662e-05	4.39284e-05	C3ar1/Ccl12/Ccl5/Ccr7/Cd74/Cxcl9/Prex1/Sell/Xcl1	9	BP
GO:0045123	cellular extravasation	8/217	77/17859	4.27887e-06	5.9615e-05	4.44118e-05	Ccl5/Cx3cr1/Itga4/Itgal/Itgb7/Sell/Selplg/Spn	8	BP
GO:0002690	positive regulation of leukocyte chemotaxis	9/217	103/17859	4.56851e-06	6.3365e-05	4.72054e-05	Aif1/C3ar1/Ccl5/Ccr6/Ccr7/Cd74/Cx3cr1/Sell/Xcl1	9	BP
GO:0018108	peptidyl-tyrosine phosphorylation	17/217	385/17859	5.04383e-06	6.96454e-05	5.18841e-05	Blk/Ccl5/Cd3e/Cd40/Cd74/Flt3/Itgb3/Lck/Ncf1/Ntf3/Ptpn22/Ptprc/Samsn1/Socs1/Tnfrsf14/Txk/Zap70	17	BP
GO:0045589	regulation of regulatory T cell differentiation	6/217	37/17859	5.09745e-06	7.00729e-05	5.22026e-05	Ctla4/Lag3/Lck/RT1-Da/RT1-Db1/Socs1	6	BP
GO:0018212	peptidyl-tyrosine modification	17/217	388/17859	5.58938e-06	7.63323e-05	5.68658e-05	Blk/Ccl5/Cd3e/Cd40/Cd74/Flt3/Itgb3/Lck/Ncf1/Ntf3/Ptpn22/Ptprc/Samsn1/Socs1/Tnfrsf14/Txk/Zap70	17	BP
GO:0060759	regulation of response to cytokine stimulus	10/217	134/17859	5.60215e-06	7.63323e-05	5.68658e-05	Ccl5/Cd74/Irf7/Oas3/Padi2/Ptprc/Samhd1/Socs1/Txk/Zbp1	10	BP
GO:0002716	negative regulation of natural killer cell mediated immunity	5/217	22/17859	5.62785e-06	7.63462e-05	5.68761e-05	Cd96/Havcr2/Klrc1/Klrd1/RT1-S3	5	BP
GO:0002823	negative regulation of adaptive immune response based on somatic recombination of immune receptors built from immunoglobulin superfamily domains	7/217	58/17859	6.30821e-06	8.52022e-05	6.34736e-05	Havcr2/Klrc1/Klrd1/Ptprc/Spn/Tbx21/Xcl1	7	BP
GO:0051482	positive regulation of cytosolic calcium ion concentration involved in phospholipase C-activating G protein-coupled signaling pathway	6/217	39/17859	7.01037e-06	9.42743e-05	7.02321e-05	C3ar1/Gpr174/Gpr18/Gpr35/Gpr65/P2ry10	6	BP
GO:0002639	positive regulation of immunoglobulin production	7/217	59/17859	7.08419e-06	9.48546e-05	7.06644e-05	Cd40/Mzb1/Ptprc/RT1-S3/Sash3/Tbx21/Xcl1	7	BP
GO:0046629	gamma-delta T cell activation	5/217	23/17859	7.12028e-06	9.49268e-05	7.07182e-05	Ccr9/Gpr18/Klrc1/Lck/Ptprc	5	BP
GO:0035710	CD4-positive, alpha-beta T cell activation	9/217	110/17859	7.85482e-06	0.00010427	7.76788e-05	Ly9/RT1-Da/RT1-Db1/Runx3/Sash3/Socs1/Spn/Tbx21/Xcl1	9	BP
GO:0034113	heterotypic cell-cell adhesion	7/217	61/17859	8.87512e-06	0.000116812	8.70219e-05	Cd2/Itga4/Itgad/Itgb3/Itgb7/Lck/Ptprc	7	BP
GO:0045620	negative regulation of lymphocyte differentiation	7/217	61/17859	8.87512e-06	0.000116812	8.70219e-05	Cd74/Ctla4/Flt3/Lag3/Runx3/Socs1/Tbx21	7	BP
GO:0002437	inflammatory response to antigenic stimulus	8/217	85/17859	9.00532e-06	0.000118023	8.79243e-05	C3/Ccr5/Ccr7/Cd6/Il2ra/RT1-Db1/RT1-S3/Spn	8	BP
GO:0045066	regulatory T cell differentiation	6/217	41/17859	9.46771e-06	0.00012356	9.2049e-05	Ctla4/Lag3/Lck/RT1-Da/RT1-Db1/Socs1	6	BP
GO:0060402	calcium ion transport into cytosol	11/217	175/17859	9.9386e-06	0.00012916	9.62211e-05	Ccr5/Coro1a/Cxcl9/Cxcr3/Itgb3/Lck/P2ry6/Ptprc/Trpm2/Xcl1/Xcr1	11	BP
GO:0038093	Fc receptor signaling pathway	5/217	25/17859	1.10221e-05	0.000142642	0.000106265	Fcar/Fcgr3a/Myo1g/Nr4a3/Ptprc	5	BP
GO:0030101	natural killer cell activation	8/217	88/17859	1.16588e-05	0.000150253	0.000111935	Coro1a/Havcr2/Il2rb/Klrk1/Ptpn22/Ptprc/RT1-S3/Slamf7	8	BP
GO:0001916	positive regulation of T cell mediated cytotoxicity	6/217	43/17859	1.25797e-05	0.000161448	0.000120275	Ptprc/RT1-CE4/RT1-Da/RT1-Db1/RT1-S3/Xcl1	6	BP
GO:0043367	CD4-positive, alpha-beta T cell differentiation	8/217	89/17859	1.2678e-05	0.000162037	0.000120714	Ly9/RT1-Da/RT1-Db1/Runx3/Sash3/Socs1/Spn/Tbx21	8	BP
GO:0036336	dendritic cell migration	5/217	26/17859	1.35121e-05	0.000171987	0.000128126	Alox5/Ccr6/Ccr7/Slamf9/Trpm2	5	BP
GO:0002347	response to tumor cell	6/217	44/17859	1.44193e-05	0.000182036	0.000135613	Cd226/Cd40lg/Havcr2/Klrk1/Prf1/RT1-Db1	6	BP
GO:0046636	negative regulation of alpha-beta T cell activation	6/217	44/17859	1.44193e-05	0.000182036	0.000135613	Adora2a/Runx3/Socs1/Tbx21/Tnfrsf14/Xcl1	6	BP
GO:0019058	viral life cycle	13/217	256/17859	1.57041e-05	0.00019745	0.000147096	Ccl12/Ccl5/Cd74/Ciita/Fcnb/Havcr1/Itgb3/Oas2/Oas3/Oasl/RT1-Db1/Rab43/Siglec1	13	BP
GO:0030183	B cell differentiation	10/217	151/17859	1.60885e-05	0.000201465	0.000150087	Cd27/Cd40lg/Cd79b/Flt3/Ikzf3/Irf8/Pou2f2/Ptprc/Spib/Zfp36l2	10	BP
GO:0044403	biological process involved in symbiotic interaction	13/217	257/17859	1.63658e-05	0.000203961	0.000151946	Ccl12/Ccl5/Ccr5/Cd74/Ciita/Cx3cr1/Fcnb/Gbp4/Havcr1/Itgb3/Ncf1/RT1-Db1/Siglec1	13	BP
GO:0032753	positive regulation of interleukin-4 production	5/217	27/17859	1.64198e-05	0.000203961	0.000151946	Cd3e/Cd40lg/Havcr2/RT1-S3/Sash3	5	BP
GO:0002720	positive regulation of cytokine production involved in immune response	7/217	67/17859	1.66339e-05	0.000205794	0.000153312	Cd226/Cd74/Nr4a3/RT1-S3/Sash3/Tnfrsf14/Xcl1	7	BP
GO:0019805	quinolinate biosynthetic process	3/217	5/17859	1.73785e-05	0.000214151	0.000159537	Haao/Kmo/Kynu	3	BP
GO:0032479	regulation of type I interferon production	8/217	93/17859	1.7538e-05	0.000214407	0.000159728	Dhx58/Flt3/Havcr2/Irf7/Irf8/Oas2/Oas3/Ptpn22	8	BP
GO:0032606	type I interferon production	8/217	93/17859	1.7538e-05	0.000214407	0.000159728	Dhx58/Flt3/Havcr2/Irf7/Irf8/Oas2/Oas3/Ptpn22	8	BP
GO:0032623	interleukin-2 production	7/217	68/17859	1.83532e-05	0.000221744	0.000165194	Cd3e/Havcr2/Lag3/Ptprc/Sash3/Tbx21/Xcl1	7	BP
GO:0032663	regulation of interleukin-2 production	7/217	68/17859	1.83532e-05	0.000221744	0.000165194	Cd3e/Havcr2/Lag3/Ptprc/Sash3/Tbx21/Xcl1	7	BP
GO:2000514	regulation of CD4-positive, alpha-beta T cell activation	7/217	68/17859	1.83532e-05	0.000221744	0.000165194	RT1-Da/RT1-Db1/Runx3/Sash3/Socs1/Tbx21/Xcl1	7	BP
GO:0002883	regulation of hypersensitivity	4/217	14/17859	1.92903e-05	0.000232159	0.000172953	C3/Ccr7/RT1-S3/Spn	4	BP
GO:0002834	regulation of response to tumor cell	5/217	28/17859	1.97926e-05	0.000234553	0.000174736	Cd226/Cd40lg/Havcr2/Klrk1/RT1-Db1	5	BP
GO:0002837	regulation of immune response to tumor cell	5/217	28/17859	1.97926e-05	0.000234553	0.000174736	Cd226/Cd40lg/Havcr2/Klrk1/RT1-Db1	5	BP
GO:0032703	negative regulation of interleukin-2 production	5/217	28/17859	1.97926e-05	0.000234553	0.000174736	Havcr2/Lag3/Ptprc/Tbx21/Xcl1	5	BP
GO:0090023	positive regulation of neutrophil chemotaxis	5/217	28/17859	1.97926e-05	0.000234553	0.000174736	C3ar1/Ccr7/Cd74/Sell/Xcl1	5	BP
GO:0097530	granulocyte migration	10/217	156/17859	2.13535e-05	0.000252085	0.000187797	C3ar1/Ccl12/Ccl5/Ccr7/Cd74/Cxcl9/Prex1/Rhoh/Sell/Xcl1	10	BP
GO:0045663	positive regulation of myoblast differentiation	5/217	29/17859	2.36807e-05	0.000278496	0.000207473	Csrp3/Cxcl9/Myf6/Myod1/Myog	5	BP
GO:0002711	positive regulation of T cell mediated immunity	7/217	71/17859	2.44136e-05	0.000284948	0.000212279	Ptprc/RT1-CE4/RT1-Da/RT1-Db1/RT1-S3/Sash3/Xcl1	7	BP
GO:0046637	regulation of alpha-beta T cell differentiation	7/217	71/17859	2.44136e-05	0.000284948	0.000212279	RT1-Da/RT1-Db1/Runx3/Sash3/Socs1/Tbx21/Zap70	7	BP
GO:0071621	granulocyte chemotaxis	9/217	127/17859	2.50938e-05	0.000291786	0.000217373	C3ar1/Ccl12/Ccl5/Ccr7/Cd74/Cxcl9/Prex1/Sell/Xcl1	9	BP
GO:0001771	immunological synapse formation	4/217	15/17859	2.60548e-05	0.000301826	0.000224853	Ccr7/Cd6/Havcr2/Prf1	4	BP
GO:1902622	regulation of neutrophil migration	6/217	49/17859	2.71561e-05	0.00031341	0.000233483	C3ar1/Ccr7/Cd74/Rhoh/Sell/Xcl1	6	BP
GO:0071624	positive regulation of granulocyte chemotaxis	5/217	30/17859	2.81373e-05	0.000323527	0.00024102	C3ar1/Ccr7/Cd74/Sell/Xcl1	5	BP
GO:0007200	phospholipase C-activating G protein-coupled receptor signaling pathway	8/217	100/17859	2.98009e-05	0.000340126	0.000253386	C3ar1/Cx3cr1/Gpr174/Gpr18/Gpr35/Gpr65/P2ry10/P2ry12	8	BP
GO:0070227	lymphocyte apoptotic process	8/217	100/17859	2.98009e-05	0.000340126	0.000253386	Blk/Ccl5/Cd27/Cd3g/Cd74/Hsh2d/Il2ra/Siglec1	8	BP
GO:0060401	cytosolic calcium ion transport	11/217	197/17859	3.00521e-05	0.000341732	0.000254582	Ccr5/Coro1a/Cxcl9/Cxcr3/Itgb3/Lck/P2ry6/Ptprc/Trpm2/Xcl1/Xcr1	11	BP
GO:0002712	regulation of B cell mediated immunity	7/217	74/17859	3.20345e-05	0.000361616	0.000269395	C3/Cd226/Cd40/Ptprc/RT1-S3/Tbx21/Xcl1	7	BP
GO:0002889	regulation of immunoglobulin mediated immune response	7/217	74/17859	3.20345e-05	0.000361616	0.000269395	C3/Cd226/Cd40/Ptprc/RT1-S3/Tbx21/Xcl1	7	BP
GO:0046638	positive regulation of alpha-beta T cell differentiation	6/217	51/17859	3.42741e-05	0.000384615	0.000286529	RT1-Da/RT1-Db1/Runx3/Sash3/Socs1/Zap70	6	BP
GO:0034354	'de novo' NAD biosynthetic process from tryptophan	3/217	6/17859	3.4445e-05	0.000384615	0.000286529	Haao/Kmo/Kynu	3	BP
GO:0046874	quinolinate metabolic process	3/217	6/17859	3.4445e-05	0.000384615	0.000286529	Haao/Kmo/Kynu	3	BP
GO:0043370	regulation of CD4-positive, alpha-beta T cell differentiation	6/217	52/17859	3.83552e-05	0.000425207	0.000316769	RT1-Da/RT1-Db1/Runx3/Sash3/Socs1/Tbx21	6	BP
GO:0045581	negative regulation of T cell differentiation	6/217	52/17859	3.83552e-05	0.000425207	0.000316769	Cd74/Ctla4/Lag3/Runx3/Socs1/Tbx21	6	BP
GO:0050730	regulation of peptidyl-tyrosine phosphorylation	13/217	280/17859	4.00721e-05	0.000442654	0.000329767	Ccl5/Cd3e/Cd40/Cd74/Itgb3/Lck/Ncf1/Ntf3/Ptpn22/Ptprc/Samsn1/Socs1/Tnfrsf14	13	BP
GO:0002832	negative regulation of response to biotic stimulus	8/217	105/17859	4.23952e-05	0.000466649	0.000347643	Cd96/Dhx58/Havcr2/Klrc1/Klrd1/Oas3/RT1-S3/Samhd1	8	BP
GO:0002524	hypersensitivity	4/217	17/17859	4.45694e-05	0.000488841	0.000364175	C3/Ccr7/RT1-S3/Spn	4	BP
GO:0070228	regulation of lymphocyte apoptotic process	7/217	78/17859	4.51386e-05	0.000491597	0.000366228	Blk/Ccl5/Cd27/Cd3g/Cd74/Hsh2d/Siglec1	7	BP
GO:0098586	cellular response to virus	7/217	78/17859	4.51386e-05	0.000491597	0.000366228	Ccl5/Dhx58/Flt3/Oas3/Oasl/Pou2f2/Psmb9	7	BP
GO:0031295	T cell costimulation	5/217	33/17859	4.54925e-05	0.000493713	0.000367804	Ccr7/Cd3e/Cd5/Spn/Tnfrsf14	5	BP
GO:0048247	lymphocyte chemotaxis	6/217	54/17859	4.76852e-05	0.0005157	0.000384184	Ccl12/Ccl5/Cxcr3/Klrk1/Padi2/Xcl1	6	BP
GO:0070588	calcium ion transmembrane transport	14/217	327/17859	4.91006e-05	0.000529158	0.00039421	Ccr5/Coro1a/Cxcl9/Cxcr3/Gpr35/Itgb3/Lck/P2ry12/P2ry6/Ptpn22/Ptprc/Trpm2/Xcl1/Xcr1	14	BP
GO:0016032	viral process	14/217	328/17859	5.07466e-05	0.000544997	0.00040601	Ccl12/Ccl5/Ccr5/Cd74/Ciita/Fcnb/Havcr1/Itgb3/Oas2/Oas3/Oasl/RT1-Db1/Rab43/Siglec1	14	BP
GO:0035025	positive regulation of Rho protein signal transduction	5/217	34/17859	5.28119e-05	0.000563266	0.00041962	Gpr174/Gpr18/Gpr35/Gpr65/P2ry10	5	BP
GO:0045954	positive regulation of natural killer cell mediated cytotoxicity	5/217	34/17859	5.28119e-05	0.000563266	0.00041962	Cd226/Klrd1/Klrk1/Lag3/RT1-S3	5	BP
GO:0002673	regulation of acute inflammatory response	6/217	56/17859	5.87489e-05	0.000624417	0.000465176	C3/Ccl5/Ccr5/Ccr7/RT1-S3/Spn	6	BP
GO:0002286	T cell activation involved in immune response	8/217	110/17859	5.91511e-05	0.000624417	0.000465176	Cd74/Havcr2/Itgal/Ly9/RT1-Da/RT1-Db1/Spn/Tbx21	8	BP
GO:0007229	integrin-mediated signaling pathway	8/217	110/17859	5.91511e-05	0.000624417	0.000465176	Adamts3/Cd40lg/Itga4/Itgad/Itgal/Itgb3/Itgb7/Txk	8	BP
GO:0034627	'de novo' NAD biosynthetic process	3/217	7/17859	5.97378e-05	0.000628466	0.000468192	Haao/Kmo/Kynu	3	BP
GO:0002675	positive regulation of acute inflammatory response	5/217	35/17859	6.10086e-05	0.000637498	0.000474921	C3/Ccl5/Ccr5/Ccr7/RT1-S3	5	BP
GO:0090022	regulation of neutrophil chemotaxis	5/217	35/17859	6.10086e-05	0.000637498	0.000474921	C3ar1/Ccr7/Cd74/Sell/Xcl1	5	BP
GO:0071622	regulation of granulocyte chemotaxis	6/217	57/17859	6.50012e-05	0.000676932	0.000504298	C3ar1/Ccl5/Ccr7/Cd74/Sell/Xcl1	6	BP
GO:0002717	positive regulation of natural killer cell mediated immunity	5/217	36/17859	7.01528e-05	0.000725694	0.000540625	Cd226/Klrd1/Klrk1/Lag3/RT1-S3	5	BP
GO:0031294	lymphocyte costimulation	5/217	36/17859	7.01528e-05	0.000725694	0.000540625	Ccr7/Cd3e/Cd5/Spn/Tnfrsf14	5	BP
GO:0002407	dendritic cell chemotaxis	4/217	19/17859	7.12124e-05	0.000734199	0.000546961	Ccr6/Ccr7/Slamf9/Trpm2	4	BP
GO:0032677	regulation of interleukin-8 production	7/217	84/17859	7.27719e-05	0.000747785	0.000557082	Cd2/Cd74/Fcnb/Ptpn22/Ptprc/Tlr1/Tlr5	7	BP
GO:0002224	toll-like receptor signaling pathway	8/217	114/17859	7.62302e-05	0.000780728	0.000581624	Cd40/Havcr2/Irf7/LOC681325/Ptpn22/Tlr1/Tlr12/Tlr5	8	BP
GO:0032637	interleukin-8 production	7/217	85/17859	7.84945e-05	0.000801266	0.000596924	Cd2/Cd74/Fcnb/Ptpn22/Ptprc/Tlr1/Tlr5	7	BP
GO:0002438	acute inflammatory response to antigenic stimulus	5/217	37/17859	8.03177e-05	0.000811839	0.0006048	C3/Ccr7/Cd6/RT1-S3/Spn	5	BP
GO:1902624	positive regulation of neutrophil migration	5/217	37/17859	8.03177e-05	0.000811839	0.0006048	C3ar1/Ccr7/Cd74/Sell/Xcl1	5	BP
GO:2000108	positive regulation of leukocyte apoptotic process	5/217	37/17859	8.03177e-05	0.000811839	0.0006048	Blk/Ccl5/Fcar/Nr4a3/Siglec1	5	BP
GO:0001776	leukocyte homeostasis	8/217	116/17859	8.61948e-05	0.000868406	0.000646941	Cd74/Coro1a/Fcar/Flt3/Gapt/Gpr174/Il2ra/Sit1	8	BP
GO:0002861	regulation of inflammatory response to antigenic stimulus	5/217	38/17859	9.15791e-05	0.000913723	0.000680702	C3/Ccr7/RT1-Db1/RT1-S3/Spn	5	BP
GO:0050869	negative regulation of B cell activation	5/217	38/17859	9.15791e-05	0.000913723	0.000680702	Blk/Ctla4/Flt3/Samsn1/Tbc1d10c	5	BP
GO:2000516	positive regulation of CD4-positive, alpha-beta T cell activation	5/217	38/17859	9.15791e-05	0.000913723	0.000680702	RT1-Da/RT1-Db1/Sash3/Socs1/Xcl1	5	BP
GO:0001915	negative regulation of T cell mediated cytotoxicity	3/217	8/17859	9.47233e-05	0.00092715	0.000690704	Klrc1/Klrd1/Ptprc	3	BP
GO:0002370	natural killer cell cytokine production	3/217	8/17859	9.47233e-05	0.00092715	0.000690704	Cd226/Cd96/RT1-S3	3	BP
GO:0002727	regulation of natural killer cell cytokine production	3/217	8/17859	9.47233e-05	0.00092715	0.000690704	Cd226/Cd96/RT1-S3	3	BP
GO:0035740	CD8-positive, alpha-beta T cell proliferation	3/217	8/17859	9.47233e-05	0.00092715	0.000690704	Ptpn22/RT1-S3/Xcl1	3	BP
GO:0048743	positive regulation of skeletal muscle fiber development	3/217	8/17859	9.47233e-05	0.00092715	0.000690704	Myf6/Myod1/Myog	3	BP
GO:2000564	regulation of CD8-positive, alpha-beta T cell proliferation	3/217	8/17859	9.47233e-05	0.00092715	0.000690704	Ptpn22/RT1-S3/Xcl1	3	BP
GO:0045661	regulation of myoblast differentiation	6/217	61/17859	9.55265e-05	0.000932061	0.000694363	Csrp3/Cxcl9/Klhl41/Myf6/Myod1/Myog	6	BP
GO:0051651	maintenance of location in cell	11/217	224/17859	9.61148e-05	0.000934852	0.000696442	Ccr5/Coro1a/Cxcl9/Cxcr3/Itgb3/Lck/P2ry6/Ptprc/Trpm2/Xcl1/Xcr1	11	BP
GO:0002444	myeloid leukocyte mediated immunity	8/217	118/17859	9.7216e-05	0.000942599	0.000702214	Blk/C3/Cx3cr1/Fcar/Ncf1/Nr4a3/RT1-S3/Tac4	8	BP
GO:0050848	regulation of calcium-mediated signaling	7/217	88/17859	9.79029e-05	0.000946293	0.000704966	Cd22/Cd3e/Efhb/Itgal/Sla2/Tbc1d10c/Zap70	7	BP
GO:0070371	ERK1 and ERK2 cascade	14/217	351/17859	0.000104533	0.00100571	0.00074923	C3/Ccl12/Ccl5/Cd74/Havcr2/Itgb3/P2ry6/Ptpn22/Ptprc/RT1-Db1/Rgs14/Tbc1d10c/Xcl1/Zfp36l2	14	BP
GO:0032481	positive regulation of type I interferon production	6/217	62/17859	0.0001047	0.00100571	0.00074923	Dhx58/Flt3/Irf7/Oas2/Oas3/Ptpn22	6	BP
GO:0002577	regulation of antigen processing and presentation	4/217	21/17859	0.000107883	0.00102044	0.0007602	Ccr7/Cd74/RT1-DOa/RT1-DOb	4	BP
GO:0002836	positive regulation of response to tumor cell	4/217	21/17859	0.000107883	0.00102044	0.0007602	Cd226/Cd40lg/Klrk1/RT1-Db1	4	BP
GO:0002839	positive regulation of immune response to tumor cell	4/217	21/17859	0.000107883	0.00102044	0.0007602	Cd226/Cd40lg/Klrk1/RT1-Db1	4	BP
GO:0002864	regulation of acute inflammatory response to antigenic stimulus	4/217	21/17859	0.000107883	0.00102044	0.0007602	C3/Ccr7/RT1-S3/Spn	4	BP
GO:0045953	negative regulation of natural killer cell mediated cytotoxicity	4/217	21/17859	0.000107883	0.00102044	0.0007602	Havcr2/Klrc1/Klrd1/RT1-S3	4	BP
GO:0050871	positive regulation of B cell activation	7/217	90/17859	0.000112887	0.00106451	0.000793037	Cd27/Cd40/Cd40lg/Cd74/Ptprc/Sash3/Tbx21	7	BP
GO:0048872	homeostasis of number of cells	14/217	358/17859	0.000128596	0.00120896	0.000900646	Ccr4/Ccr7/Cd7/Cd74/Coro1a/Cx3cr1/Fcar/Flt3/Gapt/Gpr174/Il2ra/P2ry14/Sash3/Sit1	14	BP
GO:0002312	B cell activation involved in immune response	7/217	92/17859	0.000129684	0.0012155	0.000905515	Ccr6/Cd40/Cd40lg/Gapt/Irf8/Ptprc/Tbx21	7	BP
GO:0070374	positive regulation of ERK1 and ERK2 cascade	11/217	232/17859	0.000131092	0.00122497	0.000912577	C3/Ccl12/Ccl5/Cd74/Havcr2/Itgb3/P2ry6/Ptpn22/Ptprc/RT1-Db1/Xcl1	11	BP
GO:0002218	activation of innate immune response	5/217	41/17859	0.000132742	0.00123666	0.000921283	Fcnb/Klrd1/Klrk1/Nlrc4/Zbp1	5	BP
GO:0050830	defense response to Gram-positive bacterium	8/217	124/17859	0.000137497	0.00127711	0.000951419	Gbp4/Havcr2/Klrk1/Mpeg1/Ncf1/RT1-S3/Rnase6/Tnfrsf14	8	BP
GO:0006569	tryptophan catabolic process	3/217	9/17859	0.000140811	0.00128855	0.000959938	Haao/Kmo/Kynu	3	BP
GO:0035747	natural killer cell chemotaxis	3/217	9/17859	0.000140811	0.00128855	0.000959938	Ccl5/Klrk1/Xcl1	3	BP
GO:0042436	indole-containing compound catabolic process	3/217	9/17859	0.000140811	0.00128855	0.000959938	Haao/Kmo/Kynu	3	BP
GO:0046218	indolalkylamine catabolic process	3/217	9/17859	0.000140811	0.00128855	0.000959938	Haao/Kmo/Kynu	3	BP
GO:2000501	regulation of natural killer cell chemotaxis	3/217	9/17859	0.000140811	0.00128855	0.000959938	Ccl5/Klrk1/Xcl1	3	BP
GO:0032728	positive regulation of interferon-beta production	5/217	42/17859	0.000149203	0.00136131	0.00101414	Dhx58/Irf7/Oas2/Oas3/Ptpn22	5	BP
GO:0033630	positive regulation of cell adhesion mediated by integrin	4/217	23/17859	0.000156604	0.00142045	0.0010582	Ccl5/Cd3e/Itgb3/P2ry12	4	BP
GO:0050857	positive regulation of antigen receptor-mediated signaling pathway	4/217	23/17859	0.000156604	0.00142045	0.0010582	Ccr7/Cd226/Prkcb/Ptprc	4	BP
GO:0048525	negative regulation of viral process	7/217	95/17859	0.000158633	0.00143465	0.00106878	Ccl5/Cd74/Ciita/Fcnb/Oas2/Oas3/Oasl	7	BP
GO:0032735	positive regulation of interleukin-12 production	5/217	44/17859	0.000186764	0.00167925	0.001251	Ccr7/Cd40/Cd40lg/Flt3/Irf8	5	BP
GO:0060337	type I interferon signaling pathway	5/217	44/17859	0.000186764	0.00167925	0.001251	Irf7/Oas2/Oas3/Samhd1/Zbp1	5	BP
GO:0070372	regulation of ERK1 and ERK2 cascade	13/217	327/17859	0.000190557	0.00170838	0.00127271	C3/Ccl12/Ccl5/Cd74/Havcr2/Itgb3/P2ry6/Ptpn22/Ptprc/RT1-Db1/Rgs14/Tbc1d10c/Xcl1	13	BP
GO:0062207	regulation of pattern recognition receptor signaling pathway	7/217	98/17859	0.000192604	0.00172175	0.00128266	Dhx58/Irf7/LOC681325/Oasl/Ptpn22/Tlr1/Tlr5	7	BP
GO:0002885	positive regulation of hypersensitivity	3/217	10/17859	0.000199357	0.00177698	0.00132381	C3/Ccr7/RT1-S3	3	BP
GO:0030890	positive regulation of B cell proliferation	5/217	45/17859	0.000208051	0.00184384	0.00137362	Cd40/Cd40lg/Cd74/Ptprc/Sash3	5	BP
GO:0050856	regulation of T cell receptor signaling pathway	5/217	45/17859	0.000208051	0.00184384	0.00137362	Ccr7/Cd226/Lck/Ptpn22/Sla2	5	BP
GO:0050731	positive regulation of peptidyl-tyrosine phosphorylation	10/217	205/17859	0.00021051	0.00185874	0.00138472	Ccl5/Cd3e/Cd40/Cd74/Itgb3/Lck/Ncf1/Ntf3/Ptprc/Tnfrsf14	10	BP
GO:0006959	humoral immune response	11/217	245/17859	0.000210933	0.00185874	0.00138472	Alox5/C3/Ccl12/Ccr7/Cxcl9/Fcnb/Ptprc/RT1-Db1/RT1-S3/Rnase6/Xcl1	11	BP
GO:0002526	acute inflammatory response	8/217	132/17859	0.000211727	0.00186043	0.00138597	Alox5/C3/Ccl5/Ccr5/Ccr7/Cd6/RT1-S3/Spn	8	BP
GO:1901623	regulation of lymphocyte chemotaxis	4/217	25/17859	0.0002195	0.00192326	0.00143279	Ccl5/Klrk1/Padi2/Xcl1	4	BP
GO:0062208	positive regulation of pattern recognition receptor signaling pathway	5/217	46/17859	0.000231136	0.00201382	0.00150024	Dhx58/Oasl/Ptpn22/Tlr1/Tlr5	5	BP
GO:0071357	cellular response to type I interferon	5/217	46/17859	0.000231136	0.00201382	0.00150024	Irf7/Oas2/Oas3/Samhd1/Zbp1	5	BP
GO:0016445	somatic diversification of immunoglobulins	6/217	72/17859	0.000240604	0.00209041	0.00155731	Ccr6/Cd40/Cd40lg/Ptprc/Samhd1/Tbx21	6	BP
GO:0033627	cell adhesion mediated by integrin	6/217	73/17859	0.000259526	0.0022485	0.00167508	Ccl5/Cd3e/Itga4/Itgb3/Itgb7/P2ry12	6	BP
GO:0046718	viral entry into host cell	7/217	103/17859	0.000262106	0.00226451	0.001687	Cd74/Ciita/Fcnb/Havcr1/Itgb3/RT1-Db1/Siglec1	7	BP
GO:0051924	regulation of calcium ion transport	12/217	294/17859	0.000264238	0.00227657	0.00169599	Adora2a/Ccl5/Coro1a/Cxcl9/Cxcr3/Efhb/Gpr35/Itgb3/P2ry12/P2ry6/Ptpn22/Xcl1	12	BP
GO:0002420	natural killer cell mediated cytotoxicity directed against tumor cell target	3/217	11/17859	0.000271662	0.00232756	0.00173398	Cd226/Havcr2/Klrk1	3	BP
GO:0002858	regulation of natural killer cell mediated cytotoxicity directed against tumor cell target	3/217	11/17859	0.000271662	0.00232756	0.00173398	Cd226/Havcr2/Klrk1	3	BP
GO:0071347	cellular response to interleukin-1	8/217	137/17859	0.000272902	0.00233173	0.00173708	Ankrd1/Ccl12/Ccl5/Cd40/Kmo/Psmb9/Xcl1/Zbp1	8	BP
GO:0032607	interferon-alpha production	4/217	27/17859	0.000298784	0.00253884	0.00189137	Flt3/Havcr2/Irf7/Ptpn22	4	BP
GO:0032647	regulation of interferon-alpha production	4/217	27/17859	0.000298784	0.00253884	0.00189137	Flt3/Havcr2/Irf7/Ptpn22	4	BP
GO:0044409	entry into host	7/217	107/17859	0.000331143	0.00279843	0.00208477	Cd74/Ciita/Fcnb/Havcr1/Itgb3/RT1-Db1/Siglec1	7	BP
GO:1902106	negative regulation of leukocyte differentiation	7/217	107/17859	0.000331143	0.00279843	0.00208477	Cd74/Ctla4/Flt3/Lag3/Runx3/Socs1/Tbx21	7	BP
GO:0002423	natural killer cell mediated immune response to tumor cell	3/217	12/17859	0.000358975	0.00299275	0.00222952	Cd226/Havcr2/Klrk1	3	BP
GO:0002855	regulation of natural killer cell mediated immune response to tumor cell	3/217	12/17859	0.000358975	0.00299275	0.00222952	Cd226/Havcr2/Klrk1	3	BP
GO:0002866	positive regulation of acute inflammatory response to antigenic stimulus	3/217	12/17859	0.000358975	0.00299275	0.00222952	C3/Ccr7/RT1-S3	3	BP
GO:0006568	tryptophan metabolic process	3/217	12/17859	0.000358975	0.00299275	0.00222952	Haao/Kmo/Kynu	3	BP
GO:0006586	indolalkylamine metabolic process	3/217	12/17859	0.000358975	0.00299275	0.00222952	Haao/Kmo/Kynu	3	BP
GO:0050728	negative regulation of inflammatory response	8/217	143/17859	0.000364661	0.00303198	0.00225875	Adora2a/Alox5/Aoah/Cx3cr1/Gpr31/Il2ra/RT1-Db1/Spn	8	BP
GO:1903707	negative regulation of hemopoiesis	7/217	109/17859	0.000370748	0.00307433	0.0022903	Cd74/Ctla4/Flt3/Lag3/Runx3/Socs1/Tbx21	7	BP
GO:1905523	positive regulation of macrophage migration	4/217	29/17859	0.000396738	0.00328105	0.0024443	C3ar1/Ccl5/Cx3cr1/P2ry12	4	BP
GO:0002260	lymphocyte homeostasis	6/217	79/17859	0.000398964	0.00329065	0.00245146	Cd74/Coro1a/Gapt/Gpr174/Il2ra/Sit1	6	BP
GO:0034340	response to type I interferon	5/217	52/17859	0.000413124	0.00339838	0.00253171	Irf7/Oas2/Oas3/Samhd1/Zbp1	5	BP
GO:0045576	mast cell activation	6/217	80/17859	0.000427001	0.00350322	0.00260981	Blk/Cd226/Havcr1/Nr4a3/Rhoh/Tac4	6	BP
GO:1903900	regulation of viral life cycle	8/217	148/17859	0.000459056	0.00375458	0.00279707	Ccl5/Cd74/Ciita/Fcnb/Oas2/Oas3/Oasl/RT1-Db1	8	BP
GO:0002220	innate immune response activating cell surface receptor signaling pathway	3/217	13/17859	0.000462494	0.00375458	0.00279707	Fcnb/Klrd1/Klrk1	3	BP
GO:0048304	positive regulation of isotype switching to IgG isotypes	3/217	13/17859	0.000462494	0.00375458	0.00279707	Cd40/Ptprc/Tbx21	3	BP
GO:0048742	regulation of skeletal muscle fiber development	3/217	13/17859	0.000462494	0.00375458	0.00279707	Myf6/Myod1/Myog	3	BP
GO:0043372	positive regulation of CD4-positive, alpha-beta T cell differentiation	4/217	31/17859	0.000515702	0.00417557	0.0031107	RT1-Da/RT1-Db1/Sash3/Socs1	4	BP
GO:0002200	somatic diversification of immune receptors	6/217	83/17859	0.000520422	0.00420278	0.00313097	Ccr6/Cd40/Cd40lg/Ptprc/Samhd1/Tbx21	6	BP
GO:0002758	innate immune response-activating signal transduction	3/217	14/17859	0.000583368	0.00464192	0.00345812	Fcnb/Klrd1/Klrk1	3	BP
GO:0043650	dicarboxylic acid biosynthetic process	3/217	14/17859	0.000583368	0.00464192	0.00345812	Haao/Kmo/Kynu	3	BP
GO:0090713	immunological memory process	3/217	14/17859	0.000583368	0.00464192	0.00345812	RT1-Da/RT1-Db1/Tnfrsf14	3	BP
GO:0001562	response to protozoan	4/217	32/17859	0.000583805	0.00464192	0.00345812	Cd40/Gbp4/Irf8/Spn	4	BP
GO:0045577	regulation of B cell differentiation	4/217	32/17859	0.000583805	0.00464192	0.00345812	Cd27/Flt3/Ikzf3/Zfp36l2	4	BP
GO:0060338	regulation of type I interferon-mediated signaling pathway	4/217	32/17859	0.000583805	0.00464192	0.00345812	Irf7/Oas3/Samhd1/Zbp1	4	BP
GO:0051701	biological process involved in interaction with host	8/217	154/17859	0.00059756	0.00473911	0.00353052	Ccr5/Cd74/Ciita/Fcnb/Havcr1/Itgb3/RT1-Db1/Siglec1	8	BP
GO:0002483	antigen processing and presentation of endogenous peptide antigen	4/217	33/17859	0.000658055	0.00520553	0.003878	RT1-CE4/RT1-Da/RT1-Db1/RT1-S3	4	BP
GO:0002204	somatic recombination of immunoglobulin genes involved in immune response	5/217	58/17859	0.000686691	0.00537705	0.00400577	Ccr6/Cd40/Cd40lg/Ptprc/Tbx21	5	BP
GO:0002208	somatic diversification of immunoglobulins involved in immune response	5/217	58/17859	0.000686691	0.00537705	0.00400577	Ccr6/Cd40/Cd40lg/Ptprc/Tbx21	5	BP
GO:0002548	monocyte chemotaxis	5/217	58/17859	0.000686691	0.00537705	0.00400577	Aif1/Ccl12/Ccl5/Cx3cr1/Xcl1	5	BP
GO:0045190	isotype switching	5/217	58/17859	0.000686691	0.00537705	0.00400577	Ccr6/Cd40/Cd40lg/Ptprc/Tbx21	5	BP
GO:0051279	regulation of release of sequestered calcium ion into cytosol	6/217	88/17859	0.000710649	0.0055506	0.00413506	Coro1a/Cxcl9/Cxcr3/Itgb3/P2ry6/Xcl1	6	BP
GO:0009435	NAD biosynthetic process	3/217	15/17859	0.000722696	0.00561633	0.00418403	Haao/Kmo/Kynu	3	BP
GO:0060700	regulation of ribonuclease activity	3/217	15/17859	0.000722696	0.00561633	0.00418403	Oas2/Oas3/Oasl	3	BP
GO:0031640	killing of cells of other organism	6/217	89/17859	0.000754418	0.00584816	0.00435674	Ccl12/Ccr5/Cxcl9/Ncf1/Prf1/Xcl1	6	BP
GO:0001960	negative regulation of cytokine-mediated signaling pathway	5/217	60/17859	0.000802581	0.00620596	0.00462329	Ccl5/Oas3/Padi2/Ptprc/Samhd1	5	BP
GO:0019883	antigen processing and presentation of endogenous antigen	4/217	35/17859	0.000826205	0.0063727	0.00474751	RT1-CE4/RT1-Da/RT1-Db1/RT1-S3	4	BP
GO:0032608	interferon-beta production	5/217	61/17859	0.000865711	0.00664427	0.00494982	Dhx58/Irf7/Oas2/Oas3/Ptpn22	5	BP
GO:0032648	regulation of interferon-beta production	5/217	61/17859	0.000865711	0.00664427	0.00494982	Dhx58/Irf7/Oas2/Oas3/Ptpn22	5	BP
GO:0002295	T-helper cell lineage commitment	3/217	16/17859	0.000881531	0.0067157	0.00500304	Ly9/Spn/Tbx21	3	BP
GO:0009074	aromatic amino acid family catabolic process	3/217	16/17859	0.000881531	0.0067157	0.00500304	Haao/Kmo/Kynu	3	BP
GO:0016045	detection of bacterium	3/217	16/17859	0.000881531	0.0067157	0.00500304	Nlrc4/RT1-Db1/Tlr1	3	BP
GO:0051235	maintenance of location	12/217	338/17859	0.000912004	0.00693078	0.00516327	C3/Ccr5/Coro1a/Cxcl9/Cxcr3/Itgb3/Lck/P2ry6/Ptprc/Trpm2/Xcl1/Xcr1	12	BP
GO:0035458	cellular response to interferon-beta	4/217	36/17859	0.000920711	0.0069798	0.00519979	Gbp4/Ifi47/MGC105567/MGC108823	4	BP
GO:0050922	negative regulation of chemotaxis	5/217	62/17859	0.000932466	0.00705163	0.00525329	Aif1/Gpr18/Klrk1/Padi2/Sema4f	5	BP
GO:0032635	interleukin-6 production	8/217	166/17859	0.000975664	0.00734241	0.00546992	Aif1/Ccr5/Cd74/Flt3/Havcr2/Pou2f2/Ptpn22/Tlr1	8	BP
GO:0032675	regulation of interleukin-6 production	8/217	166/17859	0.000975664	0.00734241	0.00546992	Aif1/Ccr5/Cd74/Flt3/Havcr2/Pou2f2/Ptpn22/Tlr1	8	BP
GO:0071356	cellular response to tumor necrosis factor	10/217	252/17859	0.00105773	0.00792841	0.00590648	Ankrd1/Ccl12/Ccl5/Cd40/Cd40lg/Fcar/Myod1/Myog/Xcl1/Zfp36l2	10	BP
GO:0048302	regulation of isotype switching to IgG isotypes	3/217	17/17859	0.00106088	0.00792841	0.00590648	Cd40/Ptprc/Tbx21	3	BP
GO:0052126	movement in host environment	7/217	130/17859	0.00106122	0.00792841	0.00590648	Cd74/Ciita/Fcnb/Havcr1/Itgb3/RT1-Db1/Siglec1	7	BP
GO:0032615	interleukin-12 production	5/217	64/17859	0.00107737	0.00799112	0.00595319	Ccr7/Cd40/Cd40lg/Flt3/Irf8	5	BP
GO:0032655	regulation of interleukin-12 production	5/217	64/17859	0.00107737	0.00799112	0.00595319	Ccr7/Cd40/Cd40lg/Flt3/Irf8	5	BP
GO:0060761	negative regulation of response to cytokine stimulus	5/217	64/17859	0.00107737	0.00799112	0.00595319	Ccl5/Oas3/Padi2/Ptprc/Samhd1	5	BP
GO:0050792	regulation of viral process	8/217	169/17859	0.00109513	0.00810342	0.00603685	Ccl5/Cd74/Ciita/Fcnb/Oas2/Oas3/Oasl/RT1-Db1	8	BP
GO:0032757	positive regulation of interleukin-8 production	5/217	65/17859	0.00115577	0.00853176	0.00635596	Cd2/Cd74/Fcnb/Tlr1/Tlr5	5	BP
GO:0070555	response to interleukin-1	8/217	171/17859	0.00118106	0.00869768	0.00647956	Ankrd1/Ccl12/Ccl5/Cd40/Kmo/Psmb9/Xcl1/Zbp1	8	BP
GO:0016447	somatic recombination of immunoglobulin gene segments	5/217	66/17859	0.00123833	0.00905471	0.00674554	Ccr6/Cd40/Cd40lg/Ptprc/Tbx21	5	BP
GO:0032720	negative regulation of tumor necrosis factor production	5/217	66/17859	0.00123833	0.00905471	0.00674554	Clec4a3/Flt3/Gpr18/Havcr2/Ptpn22	5	BP
GO:0042093	T-helper cell differentiation	5/217	66/17859	0.00123833	0.00905471	0.00674554	Ly9/RT1-Da/RT1-Db1/Spn/Tbx21	5	BP
GO:0002701	negative regulation of production of molecular mediator of immune response	4/217	39/17859	0.0012496	0.00907547	0.00676101	Cd22/Cd96/Tbx21/Xcl1	4	BP
GO:0002863	positive regulation of inflammatory response to antigenic stimulus	3/217	18/17859	0.0012617	0.00907547	0.00676101	C3/Ccr7/RT1-S3	3	BP
GO:0038094	Fc-gamma receptor signaling pathway	3/217	18/17859	0.0012617	0.00907547	0.00676101	Fcgr3a/Myo1g/Ptprc	3	BP
GO:0043373	CD4-positive, alpha-beta T cell lineage commitment	3/217	18/17859	0.0012617	0.00907547	0.00676101	Ly9/Spn/Tbx21	3	BP
GO:0043374	CD8-positive, alpha-beta T cell differentiation	3/217	18/17859	0.0012617	0.00907547	0.00676101	Gpr18/Runx3/Socs1	3	BP
GO:0048291	isotype switching to IgG isotypes	3/217	18/17859	0.0012617	0.00907547	0.00676101	Cd40/Ptprc/Tbx21	3	BP
GO:0098543	detection of other organism	3/217	18/17859	0.0012617	0.00907547	0.00676101	Nlrc4/RT1-Db1/Tlr1	3	BP
GO:1903556	negative regulation of tumor necrosis factor superfamily cytokine production	5/217	67/17859	0.00132516	0.00950978	0.00708455	Clec4a3/Flt3/Gpr18/Havcr2/Ptpn22	5	BP
GO:0048741	skeletal muscle fiber development	4/217	40/17859	0.00137537	0.00984726	0.00733597	Klhl41/Myf6/Myod1/Myog	4	BP
GO:0002294	CD4-positive, alpha-beta T cell differentiation involved in immune response	5/217	68/17859	0.0014164	0.010048	0.00748552	Ly9/RT1-Da/RT1-Db1/Spn/Tbx21	5	BP
GO:0034121	regulation of toll-like receptor signaling pathway	5/217	68/17859	0.0014164	0.010048	0.00748552	Irf7/LOC681325/Ptpn22/Tlr1/Tlr5	5	BP
GO:0050918	positive chemotaxis	5/217	68/17859	0.0014164	0.010048	0.00748552	Ccl5/Ccr4/Coro1a/Cxcl9/Ntf3	5	BP
GO:2000107	negative regulation of leukocyte apoptotic process	5/217	68/17859	0.0014164	0.010048	0.00748552	Ccl5/Ccr5/Cd27/Cd74/Hsh2d	5	BP
GO:0002580	regulation of antigen processing and presentation of peptide or polysaccharide antigen via MHC class II	2/217	5/17859	0.00143461	0.0101539	0.0075644	RT1-DOa/RT1-DOb	2	BP
GO:0045445	myoblast differentiation	6/217	101/17859	0.00145902	0.0103031	0.00767553	Csrp3/Cxcl9/Klhl41/Myf6/Myod1/Myog	6	BP
GO:0019359	nicotinamide nucleotide biosynthetic process	3/217	19/17859	0.00148492	0.0103911	0.00774111	Haao/Kmo/Kynu	3	BP
GO:0019363	pyridine nucleotide biosynthetic process	3/217	19/17859	0.00148492	0.0103911	0.00774111	Haao/Kmo/Kynu	3	BP
GO:0033631	cell-cell adhesion mediated by integrin	3/217	19/17859	0.00148492	0.0103911	0.00774111	Ccl5/Cd3e/Itga4	3	BP
GO:0050855	regulation of B cell receptor signaling pathway	3/217	19/17859	0.00148492	0.0103911	0.00774111	Blk/Cd22/Prkcb	3	BP
GO:0032689	negative regulation of interferon-gamma production	4/217	41/17859	0.00150971	0.0104636	0.00779511	Cd96/Havcr2/RT1-Db1/Xcl1	4	BP
GO:0048873	homeostasis of number of cells within a tissue	4/217	41/17859	0.00150971	0.0104636	0.00779511	Cd7/Coro1a/Flt3/Sash3	4	BP
GO:0002293	alpha-beta T cell differentiation involved in immune response	5/217	69/17859	0.00151219	0.0104636	0.00779511	Ly9/RT1-Da/RT1-Db1/Spn/Tbx21	5	BP
GO:0014911	positive regulation of smooth muscle cell migration	5/217	69/17859	0.00151219	0.0104636	0.00779511	Aif1/Ccl5/Itgb3/Nr4a3/P2ry6	5	BP
GO:0046579	positive regulation of Ras protein signal transduction	5/217	69/17859	0.00151219	0.0104636	0.00779511	Gpr174/Gpr18/Gpr35/Gpr65/P2ry10	5	BP
GO:0050729	positive regulation of inflammatory response	7/217	139/17859	0.00156414	0.0107988	0.00804487	C3/Ccl5/Ccr5/Ccr7/Cd74/RT1-S3/Zbp1	7	BP
GO:1903169	regulation of calcium ion transmembrane transport	8/217	179/17859	0.00158011	0.0108848	0.00810894	Coro1a/Cxcl9/Cxcr3/Gpr35/Itgb3/P2ry6/Ptpn22/Xcl1	8	BP
GO:0002287	alpha-beta T cell activation involved in immune response	5/217	70/17859	0.00161267	0.0110844	0.00825762	Ly9/RT1-Da/RT1-Db1/Spn/Tbx21	5	BP
GO:0045766	positive regulation of angiogenesis	8/217	180/17859	0.00163671	0.0111999	0.00834362	C3/C3ar1/Ccl5/Cd40/Cx3cr1/Cxcr3/Itgb3/Prkcb	8	BP
GO:1904018	positive regulation of vasculature development	8/217	180/17859	0.00163671	0.0111999	0.00834362	C3/C3ar1/Ccl5/Cd40/Cx3cr1/Cxcr3/Itgb3/Prkcb	8	BP
GO:0002363	alpha-beta T cell lineage commitment	3/217	20/17859	0.00173141	0.0117183	0.00872982	Ly9/Spn/Tbx21	3	BP
GO:0002643	regulation of tolerance induction	3/217	20/17859	0.00173141	0.0117183	0.00872982	Cd3e/Havcr2/Il2ra	3	BP
GO:0002689	negative regulation of leukocyte chemotaxis	3/217	20/17859	0.00173141	0.0117183	0.00872982	Gpr18/Klrk1/Padi2	3	BP
GO:0002755	MyD88-dependent toll-like receptor signaling pathway	3/217	20/17859	0.00173141	0.0117183	0.00872982	Irf7/Tlr1/Tlr5	3	BP
GO:0070269	pyroptosis	3/217	20/17859	0.00173141	0.0117183	0.00872982	Nlrc4/RGD1359449/Zbp1	3	BP
GO:0014904	myotube cell development	4/217	44/17859	0.00196715	0.0132558	0.00987525	Klhl41/Myf6/Myod1/Myog	4	BP
GO:1905521	regulation of macrophage migration	4/217	44/17859	0.00196715	0.0132558	0.00987525	C3ar1/Ccl5/Cx3cr1/P2ry12	4	BP
GO:0014889	muscle atrophy	3/217	21/17859	0.00200199	0.013374	0.00996332	Myod1/Myog/Psmb9	3	BP
GO:0033194	response to hydroperoxide	3/217	21/17859	0.00200199	0.013374	0.00996332	Aif1/Ccl5/Trpm2	3	BP
GO:0045591	positive regulation of regulatory T cell differentiation	3/217	21/17859	0.00200199	0.013374	0.00996332	RT1-Da/RT1-Db1/Socs1	3	BP
GO:0050849	negative regulation of calcium-mediated signaling	3/217	21/17859	0.00200199	0.013374	0.00996332	Cd22/Sla2/Tbc1d10c	3	BP
GO:0007188	adenylate cyclase-modulating G protein-coupled receptor signaling pathway	9/217	231/17859	0.00211437	0.0137817	0.0102671	Adgrg5/Adora2a/Cxcl9/Cxcr3/Gpr65/Itgb3/P2ry12/Ptgdr2/S1pr4	9	BP
GO:0001794	type IIa hypersensitivity	2/217	6/17859	0.00213469	0.0137817	0.0102671	C3/RT1-S3	2	BP
GO:0001796	regulation of type IIa hypersensitivity	2/217	6/17859	0.00213469	0.0137817	0.0102671	C3/RT1-S3	2	BP
GO:0001798	positive regulation of type IIa hypersensitivity	2/217	6/17859	0.00213469	0.0137817	0.0102671	C3/RT1-S3	2	BP
GO:0002445	type II hypersensitivity	2/217	6/17859	0.00213469	0.0137817	0.0102671	C3/RT1-S3	2	BP
GO:0002461	tolerance induction dependent upon immune response	2/217	6/17859	0.00213469	0.0137817	0.0102671	C3ar1/Havcr2	2	BP
GO:0002892	regulation of type II hypersensitivity	2/217	6/17859	0.00213469	0.0137817	0.0102671	C3/RT1-S3	2	BP
GO:0002894	positive regulation of type II hypersensitivity	2/217	6/17859	0.00213469	0.0137817	0.0102671	C3/RT1-S3	2	BP
GO:0038095	Fc-epsilon receptor signaling pathway	2/217	6/17859	0.00213469	0.0137817	0.0102671	Fcgr3a/Nr4a3	2	BP
GO:0043382	positive regulation of memory T cell differentiation	2/217	6/17859	0.00213469	0.0137817	0.0102671	RT1-Da/RT1-Db1	2	BP
GO:0071352	cellular response to interleukin-2	2/217	6/17859	0.00213469	0.0137817	0.0102671	Il2ra/Il2rb	2	BP
GO:0072679	thymocyte migration	2/217	6/17859	0.00213469	0.0137817	0.0102671	Ccr6/Xcl1	2	BP
GO:0097052	L-kynurenine metabolic process	2/217	6/17859	0.00213469	0.0137817	0.0102671	Kmo/Kynu	2	BP
GO:1904141	positive regulation of microglial cell migration	2/217	6/17859	0.00213469	0.0137817	0.0102671	Cx3cr1/P2ry12	2	BP
GO:2000110	negative regulation of macrophage apoptotic process	2/217	6/17859	0.00213469	0.0137817	0.0102671	Ccl5/Ccr5	2	BP
GO:2000503	positive regulation of natural killer cell chemotaxis	2/217	6/17859	0.00213469	0.0137817	0.0102671	Ccl5/Xcl1	2	BP
GO:0010830	regulation of myotube differentiation	4/217	45/17859	0.00213877	0.0137817	0.0102671	Csrp3/Myf6/Myod1/Myog	4	BP
GO:0035821	modulation of process of other organism	6/217	110/17859	0.00225374	0.0144923	0.0107964	Ccl12/Ccl5/Ccr5/Cx3cr1/Mpeg1/Prf1	6	BP
GO:0043369	CD4-positive or CD8-positive, alpha-beta T cell lineage commitment	3/217	22/17859	0.00229748	0.0147142	0.0109617	Ly9/Spn/Tbx21	3	BP
GO:0034612	response to tumor necrosis factor	10/217	280/17859	0.00230681	0.0147142	0.0109617	Ankrd1/Ccl12/Ccl5/Cd40/Cd40lg/Fcar/Myod1/Myog/Xcl1/Zfp36l2	10	BP
GO:0035456	response to interferon-beta	4/217	46/17859	0.00232045	0.0147142	0.0109617	Gbp4/Ifi47/MGC105567/MGC108823	4	BP
GO:0042088	T-helper 1 type immune response	4/217	46/17859	0.00232045	0.0147142	0.0109617	Havcr2/RT1-Db1/Spn/Xcl1	4	BP
GO:0043029	T cell homeostasis	4/217	46/17859	0.00232045	0.0147142	0.0109617	Coro1a/Gpr174/Il2ra/Sit1	4	BP
GO:0002562	somatic diversification of immune receptors via germline recombination within a single locus	5/217	76/17859	0.00232154	0.0147142	0.0109617	Ccr6/Cd40/Cd40lg/Ptprc/Tbx21	5	BP
GO:0016444	somatic cell DNA recombination	5/217	76/17859	0.00232154	0.0147142	0.0109617	Ccr6/Cd40/Cd40lg/Ptprc/Tbx21	5	BP
GO:0002292	T cell differentiation involved in immune response	5/217	77/17859	0.00245865	0.0155513	0.0115854	Ly9/RT1-Da/RT1-Db1/Spn/Tbx21	5	BP
GO:0032814	regulation of natural killer cell activation	4/217	47/17859	0.00251249	0.0157663	0.0117455	Havcr2/Ptpn22/RT1-S3/Slamf7	4	BP
GO:0046596	regulation of viral entry into host cell	4/217	47/17859	0.00251249	0.0157663	0.0117455	Cd74/Ciita/Fcnb/RT1-Db1	4	BP
GO:0051281	positive regulation of release of sequestered calcium ion into cytosol	4/217	47/17859	0.00251249	0.0157663	0.0117455	Cxcl9/Cxcr3/P2ry6/Xcl1	4	BP
GO:0043547	positive regulation of GTPase activity	9/217	237/17859	0.00251302	0.0157663	0.0117455	Ccl12/Ccl5/Cd40/Gpr65/Ntf3/Prex1/Rgs14/Tbc1d10c/Xcl1	9	BP
GO:0002922	positive regulation of humoral immune response	3/217	23/17859	0.00261861	0.0161987	0.0120676	C3/Ccr7/Ptprc	3	BP
GO:0032727	positive regulation of interferon-alpha production	3/217	23/17859	0.00261861	0.0161987	0.0120676	Flt3/Irf7/Ptpn22	3	BP
GO:0042402	cellular biogenic amine catabolic process	3/217	23/17859	0.00261861	0.0161987	0.0120676	Haao/Kmo/Kynu	3	BP
GO:0048643	positive regulation of skeletal muscle tissue development	3/217	23/17859	0.00261861	0.0161987	0.0120676	Myf6/Myod1/Myog	3	BP
GO:0072525	pyridine-containing compound biosynthetic process	3/217	23/17859	0.00261861	0.0161987	0.0120676	Haao/Kmo/Kynu	3	BP
GO:1901739	regulation of myoblast fusion	3/217	23/17859	0.00261861	0.0161987	0.0120676	Cxcl9/Myod1/Myog	3	BP
GO:2000353	positive regulation of endothelial cell apoptotic process	3/217	23/17859	0.00261861	0.0161987	0.0120676	Cd40/Cd40lg/Itga4	3	BP
GO:0070229	negative regulation of lymphocyte apoptotic process	4/217	48/17859	0.00271516	0.0167624	0.0124876	Ccl5/Cd27/Cd74/Hsh2d	4	BP
GO:0035914	skeletal muscle cell differentiation	5/217	79/17859	0.00275036	0.0169123	0.0125992	Ankrd1/Klhl41/Myf6/Myod1/Myog	5	BP
GO:0051057	positive regulation of small GTPase mediated signal transduction	5/217	79/17859	0.00275036	0.0169123	0.0125992	Gpr174/Gpr18/Gpr35/Gpr65/P2ry10	5	BP
GO:0051602	response to electrical stimulus	5/217	80/17859	0.00290525	0.0175414	0.0130679	Aif1/Ciita/Disc1/Myog/Psmb9	5	BP
GO:0001961	positive regulation of cytokine-mediated signaling pathway	4/217	49/17859	0.00292875	0.0175414	0.0130679	Cd74/Irf7/Txk/Zbp1	4	BP
GO:0033628	regulation of cell adhesion mediated by integrin	4/217	49/17859	0.00292875	0.0175414	0.0130679	Ccl5/Cd3e/Itgb3/P2ry12	4	BP
GO:0002583	regulation of antigen processing and presentation of peptide antigen	2/217	7/17859	0.00296467	0.0175414	0.0130679	RT1-DOa/RT1-DOb	2	BP
GO:0002606	positive regulation of dendritic cell antigen processing and presentation	2/217	7/17859	0.00296467	0.0175414	0.0130679	Ccr7/Cd74	2	BP
GO:0002729	positive regulation of natural killer cell cytokine production	2/217	7/17859	0.00296467	0.0175414	0.0130679	Cd226/RT1-S3	2	BP
GO:0030885	regulation of myeloid dendritic cell activation	2/217	7/17859	0.00296467	0.0175414	0.0130679	Havcr2/Klrk1	2	BP
GO:0032829	regulation of CD4-positive, CD25-positive, alpha-beta regulatory T cell differentiation	2/217	7/17859	0.00296467	0.0175414	0.0130679	RT1-Da/RT1-Db1	2	BP
GO:0032831	positive regulation of CD4-positive, CD25-positive, alpha-beta regulatory T cell differentiation	2/217	7/17859	0.00296467	0.0175414	0.0130679	RT1-Da/RT1-Db1	2	BP
GO:0033590	response to cobalamin	2/217	7/17859	0.00296467	0.0175414	0.0130679	Cd40/Cd40lg	2	BP
GO:0033634	positive regulation of cell-cell adhesion mediated by integrin	2/217	7/17859	0.00296467	0.0175414	0.0130679	Ccl5/Cd3e	2	BP
GO:0043376	regulation of CD8-positive, alpha-beta T cell differentiation	2/217	7/17859	0.00296467	0.0175414	0.0130679	Runx3/Socs1	2	BP
GO:0060369	positive regulation of Fc receptor mediated stimulatory signaling pathway	2/217	7/17859	0.00296467	0.0175414	0.0130679	Cd226/Ptprc	2	BP
GO:0070100	negative regulation of chemokine-mediated signaling pathway	2/217	7/17859	0.00296467	0.0175414	0.0130679	Ccl5/Padi2	2	BP
GO:0070106	interleukin-27-mediated signaling pathway	2/217	7/17859	0.00296467	0.0175414	0.0130679	Oas2/Oasl	2	BP
GO:1904124	microglial cell migration	2/217	7/17859	0.00296467	0.0175414	0.0130679	Cx3cr1/P2ry12	2	BP
GO:1904139	regulation of microglial cell migration	2/217	7/17859	0.00296467	0.0175414	0.0130679	Cx3cr1/P2ry12	2	BP
GO:0009310	amine catabolic process	3/217	24/17859	0.0029661	0.0175414	0.0130679	Haao/Kmo/Kynu	3	BP
GO:0090026	positive regulation of monocyte chemotaxis	3/217	24/17859	0.0029661	0.0175414	0.0130679	Aif1/Ccl5/Cx3cr1	3	BP
GO:0098581	detection of external biotic stimulus	3/217	24/17859	0.0029661	0.0175414	0.0130679	Nlrc4/RT1-Db1/Tlr1	3	BP
GO:0010522	regulation of calcium ion transport into cytosol	6/217	117/17859	0.00306905	0.0180811	0.01347	Coro1a/Cxcl9/Cxcr3/Itgb3/P2ry6/Xcl1	6	BP
GO:0048661	positive regulation of smooth muscle cell proliferation	6/217	117/17859	0.00306905	0.0180811	0.01347	Aif1/C3ar1/Ccl5/Itgb3/Nr4a3/P2ry6	6	BP
GO:0003012	muscle system process	13/217	446/17859	0.00326232	0.0191832	0.014291	Aif1/Chrna1/Chrnd/Chrng/Csrp3/Kcnn2/Lck/Myod1/Myog/Ncf1/Nr4a3/Psmb9/Tifab	13	BP
GO:0010818	T cell chemotaxis	3/217	25/17859	0.00334064	0.0196064	0.0146063	Ccl5/Cxcr3/Xcl1	3	BP
GO:0002753	cytoplasmic pattern recognition receptor signaling pathway	4/217	51/17859	0.00338986	0.0198201	0.0147655	Dhx58/Oas3/Oasl/Ptpn22	4	BP
GO:0045071	negative regulation of viral genome replication	4/217	51/17859	0.00338986	0.0198201	0.0147655	Ccl5/Oas2/Oas3/Oasl	4	BP
GO:0010959	regulation of metal ion transport	13/217	449/17859	0.00345259	0.0201488	0.0150104	Adora2a/Ccl5/Coro1a/Cxcl9/Cxcr3/Efhb/Gpr35/Itgb3/Kcnn2/P2ry12/P2ry6/Ptpn22/Xcl1	13	BP
GO:0007519	skeletal muscle tissue development	8/217	204/17859	0.00354901	0.0206725	0.0154005	Ankrd1/Chrna1/Chrnd/Foxp2/Klhl41/Myf6/Myod1/Myog	8	BP
GO:0043277	apoptotic cell clearance	4/217	52/17859	0.00363792	0.0211505	0.0157566	C3/Fcnb/Itgb3/Rhoh	4	BP
GO:0002719	negative regulation of cytokine production involved in immune response	3/217	26/17859	0.00374286	0.021558	0.0160602	Cd96/Tbx21/Xcl1	3	BP
GO:0019362	pyridine nucleotide metabolic process	3/217	26/17859	0.00374286	0.021558	0.0160602	Haao/Kmo/Kynu	3	BP
GO:0039529	RIG-I signaling pathway	3/217	26/17859	0.00374286	0.021558	0.0160602	Dhx58/Oas3/Oasl	3	BP
GO:0046496	nicotinamide nucleotide metabolic process	3/217	26/17859	0.00374286	0.021558	0.0160602	Haao/Kmo/Kynu	3	BP
GO:0046597	negative regulation of viral entry into host cell	3/217	26/17859	0.00374286	0.021558	0.0160602	Cd74/Ciita/Fcnb	3	BP
GO:0007517	muscle organ development	11/217	350/17859	0.00379477	0.0218164	0.0162527	Ankrd1/Chrna1/Chrnd/Cryab/Csrp3/Foxp2/Klhl41/Myf6/Myod1/Myog/Tifab	11	BP
GO:0052372	modulation by symbiont of entry into host	4/217	53/17859	0.00389802	0.0221326	0.0164882	Cd74/Ciita/Fcnb/RT1-Db1	4	BP
GO:0002578	negative regulation of antigen processing and presentation	2/217	8/17859	0.00392132	0.0221326	0.0164882	RT1-DOa/RT1-DOb	2	BP
GO:0002860	positive regulation of natural killer cell mediated cytotoxicity directed against tumor cell target	2/217	8/17859	0.00392132	0.0221326	0.0164882	Cd226/Klrk1	2	BP
GO:0014744	positive regulation of muscle adaptation	2/217	8/17859	0.00392132	0.0221326	0.0164882	Aif1/Myog	2	BP
GO:0039530	MDA-5 signaling pathway	2/217	8/17859	0.00392132	0.0221326	0.0164882	Dhx58/Oas3	2	BP
GO:0045590	negative regulation of regulatory T cell differentiation	2/217	8/17859	0.00392132	0.0221326	0.0164882	Ctla4/Lag3	2	BP
GO:0050904	diapedesis	2/217	8/17859	0.00392132	0.0221326	0.0164882	Ccl5/Itga4	2	BP
GO:0070669	response to interleukin-2	2/217	8/17859	0.00392132	0.0221326	0.0164882	Il2ra/Il2rb	2	BP
GO:0071315	cellular response to morphine	2/217	8/17859	0.00392132	0.0221326	0.0164882	Aif1/Ccl5	2	BP
GO:0072126	positive regulation of glomerular mesangial cell proliferation	2/217	8/17859	0.00392132	0.0221326	0.0164882	C3ar1/Itgb3	2	BP
GO:0048634	regulation of muscle organ development	4/217	54/17859	0.00417042	0.0232581	0.0173267	Myf6/Myod1/Myog/Tifab	4	BP
GO:0002532	production of molecular mediator involved in inflammatory response	5/217	87/17859	0.00417114	0.0232581	0.0173267	Alox5/Cd6/Cd74/Ncf1/Pld4	5	BP
GO:0035994	response to muscle stretch	3/217	27/17859	0.00417337	0.0232581	0.0173267	Ankrd1/Csrp3/Myod1	3	BP
GO:0042430	indole-containing compound metabolic process	3/217	27/17859	0.00417337	0.0232581	0.0173267	Haao/Kmo/Kynu	3	BP
GO:0045844	positive regulation of striated muscle tissue development	3/217	27/17859	0.00417337	0.0232581	0.0173267	Myf6/Myod1/Myog	3	BP
GO:0046639	negative regulation of alpha-beta T cell differentiation	3/217	27/17859	0.00417337	0.0232581	0.0173267	Runx3/Socs1/Tbx21	3	BP
GO:0048636	positive regulation of muscle organ development	3/217	27/17859	0.00417337	0.0232581	0.0173267	Myf6/Myod1/Myog	3	BP
GO:0006925	inflammatory cell apoptotic process	3/217	28/17859	0.00463274	0.0255876	0.0190622	Ccl5/Ccr5/Fcar	3	BP
GO:0032069	regulation of nuclease activity	3/217	28/17859	0.00463274	0.0255876	0.0190622	Oas2/Oas3/Oasl	3	BP
GO:0042832	defense response to protozoan	3/217	28/17859	0.00463274	0.0255876	0.0190622	Cd40/Gbp4/Irf8	3	BP
GO:0050927	positive regulation of positive chemotaxis	3/217	28/17859	0.00463274	0.0255876	0.0190622	Ccr4/Cxcl9/Ntf3	3	BP
GO:1901863	positive regulation of muscle tissue development	3/217	28/17859	0.00463274	0.0255876	0.0190622	Myf6/Myod1/Myog	3	BP
GO:0060760	positive regulation of response to cytokine stimulus	4/217	56/17859	0.00475322	0.0262063	0.019523	Cd74/Irf7/Txk/Zbp1	4	BP
GO:0002223	stimulatory C-type lectin receptor signaling pathway	2/217	9/17859	0.00500147	0.0273313	0.0203612	Klrd1/Klrk1	2	BP
GO:0002291	T cell activation via T cell receptor contact with antigen bound to MHC molecule on antigen presenting cell	2/217	9/17859	0.00500147	0.0273313	0.0203612	Havcr2/Itgal	2	BP
GO:0002857	positive regulation of natural killer cell mediated immune response to tumor cell	2/217	9/17859	0.00500147	0.0273313	0.0203612	Cd226/Klrk1	2	BP
GO:0043380	regulation of memory T cell differentiation	2/217	9/17859	0.00500147	0.0273313	0.0203612	RT1-Da/RT1-Db1	2	BP
GO:0046877	regulation of saliva secretion	2/217	9/17859	0.00500147	0.0273313	0.0203612	Tac4/Tifab	2	BP
GO:0035023	regulation of Rho protein signal transduction	5/217	91/17859	0.00504947	0.027545	0.0205204	Gpr174/Gpr18/Gpr35/Gpr65/P2ry10	5	BP
GO:0002360	T cell lineage commitment	3/217	29/17859	0.00512151	0.0277909	0.0207036	Ly9/Spn/Tbx21	3	BP
GO:0034123	positive regulation of toll-like receptor signaling pathway	3/217	29/17859	0.00512151	0.0277909	0.0207036	Ptpn22/Tlr1/Tlr5	3	BP
GO:0050926	regulation of positive chemotaxis	3/217	29/17859	0.00512151	0.0277909	0.0207036	Ccr4/Cxcl9/Ntf3	3	BP
GO:0031663	lipopolysaccharide-mediated signaling pathway	4/217	58/17859	0.00538838	0.0290353	0.0216306	Ccl5/Cd6/Ly86/Ptpn22	4	BP
GO:0033003	regulation of mast cell activation	4/217	58/17859	0.00538838	0.0290353	0.0216306	Blk/Cd226/Havcr1/Nr4a3	4	BP
GO:0051155	positive regulation of striated muscle cell differentiation	4/217	58/17859	0.00538838	0.0290353	0.0216306	Csrp3/Myf6/Myod1/Myog	4	BP
GO:1905517	macrophage migration	4/217	58/17859	0.00538838	0.0290353	0.0216306	C3ar1/Ccl5/Cx3cr1/P2ry12	4	BP
GO:0060538	skeletal muscle organ development	8/217	219/17859	0.00542231	0.0291673	0.0217289	Ankrd1/Chrna1/Chrnd/Foxp2/Klhl41/Myf6/Myod1/Myog	8	BP
GO:0014902	myotube differentiation	6/217	132/17859	0.00553403	0.0297166	0.0221381	Csrp3/Cxcl9/Klhl41/Myf6/Myod1/Myog	6	BP
GO:0009072	aromatic amino acid family metabolic process	3/217	30/17859	0.00564018	0.0301818	0.0224847	Haao/Kmo/Kynu	3	BP
GO:0039528	cytoplasmic pattern recognition receptor signaling pathway in response to virus	3/217	30/17859	0.00564018	0.0301818	0.0224847	Dhx58/Oas3/Oasl	3	BP
GO:0002534	cytokine production involved in inflammatory response	4/217	59/17859	0.00572623	0.0304841	0.0227099	Alox5/Cd6/Cd74/Pld4	4	BP
GO:0050732	negative regulation of peptidyl-tyrosine phosphorylation	4/217	59/17859	0.00572623	0.0304841	0.0227099	Ntf3/Ptprc/Samsn1/Socs1	4	BP
GO:1900015	regulation of cytokine production involved in inflammatory response	4/217	59/17859	0.00572623	0.0304841	0.0227099	Alox5/Cd6/Cd74/Pld4	4	BP
GO:0031589	cell-substrate adhesion	11/217	371/17859	0.00583681	0.0310193	0.0231086	Cd3e/Cd96/Coro1a/Disc1/Itga4/Itgal/Itgb3/Itgb7/Myo1g/Parvg/Prex1	11	BP
GO:0070231	T cell apoptotic process	4/217	60/17859	0.00607792	0.0317071	0.023621	Ccl5/Cd27/Il2ra/Siglec1	4	BP
GO:0002902	regulation of B cell apoptotic process	3/217	31/17859	0.00618923	0.0317071	0.023621	Blk/Cd74/Hsh2d	3	BP
GO:0045830	positive regulation of isotype switching	3/217	31/17859	0.00618923	0.0317071	0.023621	Cd40/Ptprc/Tbx21	3	BP
GO:1903901	negative regulation of viral life cycle	3/217	31/17859	0.00618923	0.0317071	0.023621	Cd74/Ciita/Fcnb	3	BP
GO:0002433	immune response-regulating cell surface receptor signaling pathway involved in phagocytosis	2/217	10/17859	0.006202	0.0317071	0.023621	Myo1g/Ptprc	2	BP
GO:0002604	regulation of dendritic cell antigen processing and presentation	2/217	10/17859	0.006202	0.0317071	0.023621	Ccr7/Cd74	2	BP
GO:0031622	positive regulation of fever generation	2/217	10/17859	0.006202	0.0317071	0.023621	Ccl5/Ccr5	2	BP
GO:0032817	regulation of natural killer cell proliferation	2/217	10/17859	0.006202	0.0317071	0.023621	Ptpn22/RT1-S3	2	BP
GO:0038096	Fc-gamma receptor signaling pathway involved in phagocytosis	2/217	10/17859	0.006202	0.0317071	0.023621	Myo1g/Ptprc	2	BP
GO:0043379	memory T cell differentiation	2/217	10/17859	0.006202	0.0317071	0.023621	RT1-Da/RT1-Db1	2	BP
GO:0045588	positive regulation of gamma-delta T cell differentiation	2/217	10/17859	0.006202	0.0317071	0.023621	Lck/Ptprc	2	BP
GO:0046645	positive regulation of gamma-delta T cell activation	2/217	10/17859	0.006202	0.0317071	0.023621	Lck/Ptprc	2	BP
GO:0070099	regulation of chemokine-mediated signaling pathway	2/217	10/17859	0.006202	0.0317071	0.023621	Ccl5/Padi2	2	BP
GO:0070189	kynurenine metabolic process	2/217	10/17859	0.006202	0.0317071	0.023621	Kmo/Kynu	2	BP
GO:0071317	cellular response to isoquinoline alkaloid	2/217	10/17859	0.006202	0.0317071	0.023621	Aif1/Ccl5	2	BP
GO:0098598	learned vocalization behavior or vocal learning	2/217	10/17859	0.006202	0.0317071	0.023621	Foxp2/Tifab	2	BP
GO:0098883	synapse pruning	2/217	10/17859	0.006202	0.0317071	0.023621	C3/Cx3cr1	2	BP
GO:1900246	positive regulation of RIG-I signaling pathway	2/217	10/17859	0.006202	0.0317071	0.023621	Dhx58/Oasl	2	BP
GO:1901724	positive regulation of cell proliferation involved in kidney development	2/217	10/17859	0.006202	0.0317071	0.023621	C3ar1/Itgb3	2	BP
GO:1990840	response to lectin	2/217	10/17859	0.006202	0.0317071	0.023621	Klrd1/Klrk1	2	BP
GO:1990858	cellular response to lectin	2/217	10/17859	0.006202	0.0317071	0.023621	Klrd1/Klrk1	2	BP
GO:2000109	regulation of macrophage apoptotic process	2/217	10/17859	0.006202	0.0317071	0.023621	Ccl5/Ccr5	2	BP
GO:2000510	positive regulation of dendritic cell chemotaxis	2/217	10/17859	0.006202	0.0317071	0.023621	Ccr6/Ccr7	2	BP
GO:0042246	tissue regeneration	5/217	97/17859	0.00660161	0.0336944	0.0251015	Mustn1/Myf6/Myod1/Myog/Txk	5	BP
GO:0002544	chronic inflammatory response	3/217	32/17859	0.00676911	0.0343227	0.0255696	Ccl5/Cx3cr1/Spn	3	BP
GO:0002828	regulation of type 2 immune response	3/217	32/17859	0.00676911	0.0343227	0.0255696	Cd74/Tbx21/Xcl1	3	BP
GO:0045745	positive regulation of G protein-coupled receptor signaling pathway	3/217	32/17859	0.00676911	0.0343227	0.0255696	C3/Itgb3/Ptgdr2	3	BP
GO:0090025	regulation of monocyte chemotaxis	3/217	32/17859	0.00676911	0.0343227	0.0255696	Aif1/Ccl5/Cx3cr1	3	BP
GO:0043087	regulation of GTPase activity	10/217	329/17859	0.00712482	0.0360672	0.0268692	Ccl12/Ccl5/Cd40/Gpr65/Klrk1/Ntf3/Prex1/Rgs14/Tbc1d10c/Xcl1	10	BP
GO:0048641	regulation of skeletal muscle tissue development	3/217	33/17859	0.00738021	0.0370365	0.0275913	Myf6/Myod1/Myog	3	BP
GO:0050858	negative regulation of antigen receptor-mediated signaling pathway	3/217	33/17859	0.00738021	0.0370365	0.0275913	Cd22/Ptpn22/Sla2	3	BP
GO:0060142	regulation of syncytium formation by plasma membrane fusion	3/217	33/17859	0.00738021	0.0370365	0.0275913	Cxcl9/Myod1/Myog	3	BP
GO:0072524	pyridine-containing compound metabolic process	3/217	33/17859	0.00738021	0.0370365	0.0275913	Haao/Kmo/Kynu	3	BP
GO:2000515	negative regulation of CD4-positive, alpha-beta T cell activation	3/217	33/17859	0.00738021	0.0370365	0.0275913	Runx3/Tbx21/Xcl1	3	BP
GO:0002361	CD4-positive, CD25-positive, alpha-beta regulatory T cell differentiation	2/217	11/17859	0.00751985	0.0370365	0.0275913	RT1-Da/RT1-Db1	2	BP
GO:0002579	positive regulation of antigen processing and presentation	2/217	11/17859	0.00751985	0.0370365	0.0275913	Ccr7/Cd74	2	BP
GO:0002725	negative regulation of T cell cytokine production	2/217	11/17859	0.00751985	0.0370365	0.0275913	Tbx21/Xcl1	2	BP
GO:0014732	skeletal muscle atrophy	2/217	11/17859	0.00751985	0.0370365	0.0275913	Myod1/Myog	2	BP
GO:0018894	dibenzo-p-dioxin metabolic process	2/217	11/17859	0.00751985	0.0370365	0.0275913	Ccl5/Prkcb	2	BP
GO:0034154	toll-like receptor 7 signaling pathway	2/217	11/17859	0.00751985	0.0370365	0.0275913	Havcr2/Ptpn22	2	BP
GO:0035726	common myeloid progenitor cell proliferation	2/217	11/17859	0.00751985	0.0370365	0.0275913	Flt3/Nr4a3	2	BP
GO:0045657	positive regulation of monocyte differentiation	2/217	11/17859	0.00751985	0.0370365	0.0275913	Cd74/RT1-Db1	2	BP
GO:0051712	positive regulation of killing of cells of other organism	2/217	11/17859	0.00751985	0.0370365	0.0275913	Ccr5/Prf1	2	BP
GO:0071447	cellular response to hydroperoxide	2/217	11/17859	0.00751985	0.0370365	0.0275913	Aif1/Ccl5	2	BP
GO:0071888	macrophage apoptotic process	2/217	11/17859	0.00751985	0.0370365	0.0275913	Ccl5/Ccr5	2	BP
GO:0090715	immunological memory formation process	2/217	11/17859	0.00751985	0.0370365	0.0275913	RT1-Da/RT1-Db1	2	BP
GO:0032613	interleukin-10 production	4/217	64/17859	0.00762781	0.0374489	0.0278985	Cd40lg/RT1-Db1/Sash3/Xcl1	4	BP
GO:0032653	regulation of interleukin-10 production	4/217	64/17859	0.00762781	0.0374489	0.0278985	Cd40lg/RT1-Db1/Sash3/Xcl1	4	BP
GO:0043270	positive regulation of ion transport	10/217	334/17859	0.00788268	0.0386389	0.028785	Adora2a/Alox5/Ccl5/Cxcl9/Cxcr3/Kcnn2/Kmo/P2ry12/P2ry6/Xcl1	10	BP
GO:0009595	detection of biotic stimulus	3/217	34/17859	0.00802293	0.0392641	0.0292508	Nlrc4/RT1-Db1/Tlr1	3	BP
GO:0014910	regulation of smooth muscle cell migration	5/217	102/17859	0.0081285	0.0397179	0.0295889	Aif1/Ccl5/Itgb3/Nr4a3/P2ry6	5	BP
GO:0002275	myeloid cell activation involved in immune response	5/217	104/17859	0.00880259	0.0429281	0.0319804	Blk/Cx3cr1/Havcr2/Nr4a3/Tac4	5	BP
GO:0002664	regulation of T cell tolerance induction	2/217	12/17859	0.00895202	0.0429281	0.0319804	Cd3e/Il2ra	2	BP
GO:0014891	striated muscle atrophy	2/217	12/17859	0.00895202	0.0429281	0.0319804	Myod1/Myog	2	BP
GO:0031620	regulation of fever generation	2/217	12/17859	0.00895202	0.0429281	0.0319804	Ccl5/Ccr5	2	BP
GO:0033632	regulation of cell-cell adhesion mediated by integrin	2/217	12/17859	0.00895202	0.0429281	0.0319804	Ccl5/Cd3e	2	BP
GO:0035745	T-helper 2 cell cytokine production	2/217	12/17859	0.00895202	0.0429281	0.0319804	Tbx21/Xcl1	2	BP
GO:0038180	nerve growth factor signaling pathway	2/217	12/17859	0.00895202	0.0429281	0.0319804	Coro1a/Ntf3	2	BP
GO:0045348	positive regulation of MHC class II biosynthetic process	2/217	12/17859	0.00895202	0.0429281	0.0319804	Cd40lg/Ciita	2	BP
GO:0072124	regulation of glomerular mesangial cell proliferation	2/217	12/17859	0.00895202	0.0429281	0.0319804	C3ar1/Itgb3	2	BP
GO:0072540	T-helper 17 cell lineage commitment	2/217	12/17859	0.00895202	0.0429281	0.0319804	Ly9/Tbx21	2	BP
GO:2000508	regulation of dendritic cell chemotaxis	2/217	12/17859	0.00895202	0.0429281	0.0319804	Ccr6/Ccr7	2	BP
GO:2000551	regulation of T-helper 2 cell cytokine production	2/217	12/17859	0.00895202	0.0429281	0.0319804	Tbx21/Xcl1	2	BP
GO:0002369	T cell cytokine production	3/217	36/17859	0.00940462	0.0448128	0.0333844	Sash3/Tbx21/Xcl1	3	BP
GO:0002724	regulation of T cell cytokine production	3/217	36/17859	0.00940462	0.0448128	0.0333844	Sash3/Tbx21/Xcl1	3	BP
GO:0033005	positive regulation of mast cell activation	3/217	36/17859	0.00940462	0.0448128	0.0333844	Cd226/Havcr1/Nr4a3	3	BP
GO:0033032	regulation of myeloid cell apoptotic process	3/217	36/17859	0.00940462	0.0448128	0.0333844	Ccl5/Ccr5/Fcar	3	BP
GO:0006911	phagocytosis, engulfment	4/217	68/17859	0.00941749	0.0448128	0.0333844	Aif1/C3/Havcr1/Rhoh	4	BP
GO:0030168	platelet activation	5/217	107/17859	0.00988473	0.0469638	0.0349869	Blk/Cd40lg/Itgb3/P2ry12/Txk	5	BP
GO:0014047	glutamate secretion	3/217	37/17859	0.0101442	0.0479756	0.0357407	Adora2a/Apba1/Kmo	3	BP
GO:0042092	type 2 immune response	3/217	37/17859	0.0101442	0.0479756	0.0357407	Cd74/Tbx21/Xcl1	3	BP
GO:0042537	benzene-containing compound metabolic process	3/217	37/17859	0.0101442	0.0479756	0.0357407	Haao/Kmo/Kynu	3	BP
GO:0032755	positive regulation of interleukin-6 production	5/217	108/17859	0.0102649	0.0483798	0.0360418	Aif1/Ccr5/Cd74/Pou2f2/Tlr1	5	BP
GO:0010524	positive regulation of calcium ion transport into cytosol	4/217	70/17859	0.0104065	0.0483798	0.0360418	Cxcl9/Cxcr3/P2ry6/Xcl1	4	BP
GO:0007189	adenylate cyclase-activating G protein-coupled receptor signaling pathway	6/217	151/17859	0.0104249	0.0483798	0.0360418	Adgrg5/Adora2a/Cxcl9/Cxcr3/Gpr65/S1pr4	6	BP
GO:0001787	natural killer cell proliferation	2/217	13/17859	0.0104956	0.0483798	0.0360418	Ptpn22/RT1-S3	2	BP
GO:0031223	auditory behavior	2/217	13/17859	0.0104956	0.0483798	0.0360418	Foxp2/Tifab	2	BP
GO:0045586	regulation of gamma-delta T cell differentiation	2/217	13/17859	0.0104956	0.0483798	0.0360418	Lck/Ptprc	2	BP
GO:0046598	positive regulation of viral entry into host cell	2/217	13/17859	0.0104956	0.0483798	0.0360418	Cd74/RT1-Db1	2	BP
GO:0046643	regulation of gamma-delta T cell activation	2/217	13/17859	0.0104956	0.0483798	0.0360418	Lck/Ptprc	2	BP
GO:0048630	skeletal muscle tissue growth	2/217	13/17859	0.0104956	0.0483798	0.0360418	Chrna1/Chrnd	2	BP
GO:0051764	actin crosslink formation	2/217	13/17859	0.0104956	0.0483798	0.0360418	Aif1/Baiap2l2	2	BP
GO:0060340	positive regulation of type I interferon-mediated signaling pathway	2/217	13/17859	0.0104956	0.0483798	0.0360418	Irf7/Zbp1	2	BP
GO:0060368	regulation of Fc receptor mediated stimulatory signaling pathway	2/217	13/17859	0.0104956	0.0483798	0.0360418	Cd226/Ptprc	2	BP
GO:0072110	glomerular mesangial cell proliferation	2/217	13/17859	0.0104956	0.0483798	0.0360418	C3ar1/Itgb3	2	BP
GO:0075294	positive regulation by symbiont of entry into host	2/217	13/17859	0.0104956	0.0483798	0.0360418	Cd74/RT1-Db1	2	BP
GO:1902093	positive regulation of flagellated sperm motility	2/217	13/17859	0.0104956	0.0483798	0.0360418	Ccr6/Tac4	2	BP
GO:1903977	positive regulation of glial cell migration	2/217	13/17859	0.0104956	0.0483798	0.0360418	Cx3cr1/P2ry12	2	BP
GO:2000155	positive regulation of cilium-dependent cell motility	2/217	13/17859	0.0104956	0.0483798	0.0360418	Ccr6/Tac4	2	BP
