# Supplementary material for: Transplantation of Wharton's jelly mesenchymal stem cells encapsulated with Hydroactive® Gel promotes diabetic wound antifibrotic healing in type 2 diabetic rats
Source: Royal Society of Chemistry journal article supplement (doi:10.1039/d2tb01649d), 2022-01-01
Supplement: d2tb01649d9.xlsx [file d2tb01649d9.xlsx]

## Sheet: Sheet 1
ID	Description	GeneRatio	BgRatio	pvalue	p.adjust	qvalue	geneID	Count
rno04060	Cytokine-cytokine receptor interaction	30/256	269/8909	1.35327e-10	3.57262e-08	3.01992e-08	Bmp6/Ccl11/Ccl12/Ccl24/Ccl3/Ccl4/Ccl7/Ccr1/Ccr1l1/Clcf1/Cx3cr1/Cxcl14/Cxcl2/Cxcl3/Cxcr2/Ebi3/Il10/Il11/Il17b/Il1a/Il1r2/Il1rap/Il1rl1/Il1rn/Il23a/Il36rn/Lif/Ngf/Ngfr/Tnfrsf1b	30
rno04061	Viral protein interaction with cytokine and cytokine receptor	15/256	85/8909	1.48749e-08	1.96349e-06	1.65973e-06	Ccl11/Ccl12/Ccl24/Ccl3/Ccl4/Ccl7/Ccr1/Ccr1l1/Cx3cr1/Cxcl14/Cxcl2/Cxcl3/Cxcr2/Il10/Tnfrsf1b	15
rno05150	Staphylococcus aureus infection	12/256	100/8909	2.72156e-05	0.00202783	0.00171411	Defb14/Fcgr2b/Fpr1/Il10/Itgam/Krt17/Krt25/Krt27/Krt31/Krt35/LOC498276/Selp	12
rno05417	Lipid and atherosclerosis	18/256	209/8909	3.07246e-05	0.00202783	0.00171411	Bcl2l1/Ccl12/Ccl3/Cxcl2/Cxcl3/Cyp2j10/Ddit3/Ern1/Ero1a/Kras/Nlrp3/Olr1/Pik3cb/Pou2f1/Pou2f2/Pou2f3/Sele/Selp	18
rno05222	Small cell lung cancer	11/256	92/8909	6.09915e-05	0.00293227	0.00247863	Bcl2l1/Birc3/Cdkn1a/Gadd45a/Gadd45b/Lamb3/Lamc3/Max/Nos2/Pik3cb/Ptgs2	11
rno04062	Chemokine signaling pathway	16/256	182/8909	6.66424e-05	0.00293227	0.00247863	Ccl11/Ccl12/Ccl24/Ccl3/Ccl4/Ccl7/Ccr1/Ccr1l1/Cx3cr1/Cxcl14/Cxcl2/Cxcl3/Cxcr2/Foxo3/Kras/Pik3cb	16
rno05202	Transcriptional misregulation in cancer	16/256	194/8909	0.000142042	0.00535701	0.00452826	Bcl2l1/Birc3/Ccnt1/Cdkn1a/Ddit3/Dot1l/Elane/Gadd45a/Gadd45b/Il1r2/Itgam/Max/Ngfr/Slc45a3/Tmprss2/Wt1	16
rno04115	p53 signaling pathway	9/256	73/8909	0.000225861	0.0074534	0.00630032	Bcl2l1/Cdkn1a/Gadd45a/Gadd45b/Perp/Pmaip1/Serpinb5/Sesn2/Thbs1	9
rno05146	Amoebiasis	10/256	96/8909	0.000413419	0.012127	0.0102509	Arg1/Cxcl2/Cxcl3/Il10/Il1r2/Itgam/Lamb3/Lamc3/Nos2/Pik3cb	10
rno04210	Apoptosis	12/256	136/8909	0.000526479	0.0138991	0.0117488	Bcl2l1/Birc3/Ctsw/Ddit3/Ern1/Gadd45a/Gadd45b/Kras/Ngf/Pik3cb/Pmaip1/Tuba8	12
rno05144	Malaria	7/256	55/8909	0.000930697	0.0223367	0.0188811	Ccl12/Il10/Sele/Selp/Thbs1/Thbs4/Tlr9	7
rno04668	TNF signaling pathway	10/256	111/8909	0.00129691	0.028532	0.0241179	Birc3/Ccl12/Cxcl2/Cxcl3/Junb/Lif/Pik3cb/Ptgs2/Sele/Tnfrsf1b	10
rno04066	HIF-1 signaling pathway	10/256	114/8909	0.00158869	0.0322627	0.0272715	Aldoc/Cdkn1a/Egln3/Eno2/Hk2/Ldhc/Nos2/Pfkfb3/Pik3cb/Slc2a1	10
rno04010	MAPK signaling pathway	18/256	293/8909	0.00193403	0.0364703	0.0308281	Areg/Ddit3/Dusp16/Ereg/Fgf23/Flnb/Gadd45a/Gadd45b/Il1a/Il1rap/Kras/Max/Ngf/Ngfr/Ntf4/Pak2/Pdgfc/Pgf	18
