# Supplementary material for: Transplantation of Wharton's jelly mesenchymal stem cells encapsulated with Hydroactive® Gel promotes diabetic wound antifibrotic healing in type 2 diabetic rats
Source: Royal Society of Chemistry journal article supplement (doi:10.1039/d2tb01649d), 2022-01-01
Supplement: d2tb01649d10.xlsx [file d2tb01649d10.xlsx]

## Sheet: Sheet1
ID	Description	GeneRatio	BgRatio	pvalue	p.adjust	qvalue	geneID	Count
rno04514	Cell adhesion molecules	22/134	172/8909	7.00933e-15	1.23364e-12	9.51794e-13	Cd2/Cd22/Cd226/Cd40/Cd40lg/Cd6/Ctla4/Itga4/Itgal/Itgb7/Ptprc/RT1-Ba/RT1-CE4/RT1-DOa/RT1-DOb/RT1-Da/RT1-Db1/RT1-S3/Sell/Selplg/Siglec1/Spn	22
rno04640	Hematopoietic cell lineage	16/134	90/8909	2.31424e-13	2.03653e-11	1.57125e-11	Cd2/Cd22/Cd3d/Cd3e/Cd3g/Cd5/Cd7/Flt3/Il2ra/Itga4/Itgb3/RT1-Ba/RT1-DOa/RT1-DOb/RT1-Da/RT1-Db1	16
rno04061	Viral protein interaction with cytokine and cytokine receptor	15/134	85/8909	1.51845e-12	8.90826e-11	6.873e-11	Ccl12/Ccl5/Ccr4/Ccr5/Ccr6/Ccr7/Ccr9/Cx3cr1/Cxcl9/Cxcr3/Il2ra/Il2rb/Tnfrsf14/Xcl1/Xcr1	15
rno04658	Th1 and Th2 cell differentiation	15/134	89/8909	3.06291e-12	1.34768e-10	1.03978e-10	Cd247/Cd3d/Cd3e/Cd3g/Il2ra/Il2rb/Lck/RT1-Ba/RT1-DOa/RT1-DOb/RT1-Da/RT1-Db1/Runx3/Tbx21/Zap70	15
rno04659	Th17 cell differentiation	15/134	104/8909	3.16599e-11	1.11443e-09	8.59816e-10	Cd247/Cd3d/Cd3e/Cd3g/Il21r/Il2ra/Il2rb/Lck/RT1-Ba/RT1-DOa/RT1-DOb/RT1-Da/RT1-Db1/Tbx21/Zap70	15
rno04672	Intestinal immune network for IgA production	10/134	43/8909	5.31552e-10	1.55922e-08	1.20299e-08	Ccr9/Cd40/Cd40lg/Itga4/Itgb7/RT1-Ba/RT1-DOa/RT1-DOb/RT1-Da/RT1-Db1	10
rno04060	Cytokine-cytokine receptor interaction	20/134	269/8909	2.88077e-09	7.24309e-08	5.58827e-08	Ccl12/Ccl5/Ccr4/Ccr5/Ccr6/Ccr7/Ccr9/Cd27/Cd40/Cd40lg/Cx3cr1/Cxcl9/Cxcr3/Gdf6/Il21r/Il2ra/Il2rb/Tnfrsf14/Xcl1/Xcr1	20
rno05140	Leishmaniasis	11/134	71/8909	7.00728e-09	1.37031e-07	1.05724e-07	C3/Fcgr3a/Itga4/Ncf1/Ncf4/Prkcb/RT1-Ba/RT1-DOa/RT1-DOb/RT1-Da/RT1-Db1	11
rno05320	Autoimmune thyroid disease	11/134	71/8909	7.00728e-09	1.37031e-07	1.05724e-07	Cd40/Cd40lg/Ctla4/Prf1/RT1-Ba/RT1-CE4/RT1-DOa/RT1-DOb/RT1-Da/RT1-Db1/RT1-S3	11
rno05332	Graft-versus-host disease	10/134	61/8909	1.98758e-08	3.49813e-07	2.69892e-07	Klrc1/Klrd1/Prf1/RT1-Ba/RT1-CE4/RT1-DOa/RT1-DOb/RT1-Da/RT1-Db1/RT1-S3	10
rno05330	Allograft rejection	10/134	62/8909	2.3398e-08	3.74368e-07	2.88836e-07	Cd40/Cd40lg/Prf1/RT1-Ba/RT1-CE4/RT1-DOa/RT1-DOb/RT1-Da/RT1-Db1/RT1-S3	10
rno05169	Epstein-Barr virus infection	17/134	226/8909	4.15415e-08	6.09275e-07	4.70075e-07	Cd247/Cd3d/Cd3e/Cd3g/Cd40/Irf7/Itgal/Oas2/Oas3/RT1-Ba/RT1-CE4/RT1-DOa/RT1-DOb/RT1-Da/RT1-Db1/RT1-S3/Runx3	17
rno05340	Primary immunodeficiency	8/134	36/8909	4.50924e-08	6.10482e-07	4.71006e-07	Cd3d/Cd3e/Cd40/Cd40lg/Ciita/Lck/Ptprc/Zap70	8
rno05416	Viral myocarditis	11/134	85/8909	4.88358e-08	6.13935e-07	4.7367e-07	Cd40/Cd40lg/Itgal/Prf1/RT1-Ba/RT1-CE4/RT1-DOa/RT1-DOb/RT1-Da/RT1-Db1/RT1-S3	11
rno04612	Antigen processing and presentation	11/134	87/8909	6.24883e-08	7.33196e-07	5.65683e-07	Cd74/Ciita/Klrc1/Klrd1/RT1-Ba/RT1-CE4/RT1-DOa/RT1-DOb/RT1-Da/RT1-Db1/RT1-S3	11
rno05310	Asthma	7/134	26/8909	7.71442e-08	8.48586e-07	6.54711e-07	Cd40/Cd40lg/RT1-Ba/RT1-DOa/RT1-DOb/RT1-Da/RT1-Db1	7
rno04062	Chemokine signaling pathway	15/134	182/8909	8.29122e-08	8.58386e-07	6.62271e-07	Ccl12/Ccl5/Ccr4/Ccr5/Ccr6/Ccr7/Ccr9/Cx3cr1/Cxcl9/Cxcr3/Ncf1/Prex1/Prkcb/Xcl1/Xcr1	15
rno05150	Staphylococcus aureus infection	11/134	100/8909	2.6772e-07	2.6177e-06	2.01964e-06	C3/C3ar1/Fcar/Fcgr3a/Itgal/RT1-Ba/RT1-DOa/RT1-DOb/RT1-Da/RT1-Db1/Selplg	11
rno04145	Phagosome	14/134	185/8909	6.56831e-07	6.08433e-06	4.69425e-06	C3/Coro1a/Fcar/Fcgr3a/Itgb3/Ncf1/Ncf4/RT1-Ba/RT1-CE4/RT1-DOa/RT1-DOb/RT1-Da/RT1-Db1/RT1-S3	14
rno05145	Toxoplasmosis	11/134	111/8909	7.77425e-07	6.84134e-06	5.27831e-06	Alox5/Ccr5/Cd40/Cd40lg/Ciita/RT1-Ba/RT1-DOa/RT1-DOb/RT1-Da/RT1-Db1/Socs1	11
rno04650	Natural killer cell mediated cytotoxicity	10/134	99/8909	2.11628e-06	1.77364e-05	1.36842e-05	Cd247/Fcgr3a/Itgal/Klrc1/Klrd1/Klrk1/Lck/Prf1/Prkcb/Zap70	10
rno05321	Inflammatory bowel disease	8/134	61/8909	3.20018e-06	2.54579e-05	1.96416e-05	Il21r/RT1-Ba/RT1-DOa/RT1-DOb/RT1-Da/RT1-Db1/Tbx21/Tlr5	8
rno04660	T cell receptor signaling pathway	10/134	104/8909	3.32689e-06	2.54579e-05	1.96416e-05	Cd247/Cd3d/Cd3e/Cd3g/Cd40lg/Ctla4/Grap2/Lck/Ptprc/Zap70	10
rno05166	Human T-cell leukemia virus 1 infection	15/134	249/8909	4.57563e-06	3.35546e-05	2.58884e-05	Cd3d/Cd3e/Cd3g/Cd40/Il2ra/Il2rb/Itgal/Lck/RT1-Ba/RT1-CE4/RT1-DOa/RT1-DOb/RT1-Da/RT1-Db1/RT1-S3	15
rno05323	Rheumatoid arthritis	9/134	86/8909	5.19766e-06	3.65915e-05	2.82315e-05	Ccl12/Ccl5/Ctla4/Itgal/RT1-Ba/RT1-DOa/RT1-DOb/RT1-Da/RT1-Db1	9
rno04940	Type I diabetes mellitus	8/134	69/8909	8.2144e-06	5.43475e-05	4.19308e-05	Prf1/RT1-Ba/RT1-CE4/RT1-DOa/RT1-DOb/RT1-Da/RT1-Db1/RT1-S3	8
rno05164	Influenza A	12/134	169/8909	8.3374e-06	5.43475e-05	4.19308e-05	Ccl12/Ccl5/Ciita/Irf7/Oas2/Oas3/Prkcb/RT1-Ba/RT1-DOa/RT1-DOb/RT1-Da/RT1-Db1	12
rno05322	Systemic lupus erythematosus	10/134	119/8909	1.12047e-05	7.04293e-05	5.43384e-05	C3/Cd40/Cd40lg/Fcgr3a/Hist1h2an/RT1-Ba/RT1-DOa/RT1-DOb/RT1-Da/RT1-Db1	10
rno05168	Herpes simplex virus 1 infection	17/134	384/8909	5.9108e-05	0.000358724	0.000276767	C3/Ccl12/Ccl5/Cd74/Irf7/Itgb3/Oas2/Oas3/Pou2f2/RT1-Ba/RT1-CE4/RT1-DOa/RT1-DOb/RT1-Da/RT1-Db1/RT1-S3/Tnfrsf14	17
rno05152	Tuberculosis	11/134	177/8909	6.9007e-05	0.000404841	0.000312347	C3/Cd74/Ciita/Coro1a/Fcgr3a/RT1-Ba/RT1-DOa/RT1-DOb/RT1-Da/RT1-Db1/Tlr1	11
rno05144	Malaria	6/134	55/8909	0.000163895	0.000930503	0.000717912	Ccl12/Cd40/Cd40lg/Itgal/Klrb1c/Klrk1	6
rno05235	PD-L1 expression and PD-1 checkpoint pathway in cancer	7/134	89/8909	0.000367927	0.0020236	0.00156127	Batf3/Cd247/Cd3d/Cd3e/Cd3g/Lck/Zap70	7
rno05142	Chagas disease	7/134	104/8909	0.000941542	0.00502156	0.00387429	C3/Ccl12/Ccl5/Cd247/Cd3d/Cd3e/Cd3g	7
rno05162	Measles	8/134	144/8909	0.00144058	0.00745712	0.0057534	Cd3d/Cd3e/Cd3g/Il2ra/Il2rb/Irf7/Oas2/Oas3	8
rno04613	Neutrophil extracellular trap formation	9/134	185/8909	0.00185621	0.00914743	0.00705752	C3/Fcgr3a/Hist1h2an/Itgal/Itgb3/Ncf1/Ncf4/Prkcb/Selplg	9
rno04670	Leukocyte transendothelial migration	7/134	117/8909	0.00187106	0.00914743	0.00705752	Itga4/Itgal/Ncf1/Ncf4/Prkcb/Rhoh/Txk	7
rno04380	Osteoclast differentiation	7/134	121/8909	0.00226706	0.0107839	0.00832009	Fcgr3a/Itgb3/Lck/Lilrc2/Ncf1/Ncf4/Socs1	7
rno04620	Toll-like receptor signaling pathway	6/134	93/8909	0.0027064	0.0125349	0.00967108	Ccl5/Cd40/Cxcl9/Irf7/Tlr1/Tlr5	6
rno04080	Neuroactive ligand-receptor interaction	13/134	375/8909	0.00414956	0.0187262	0.0144478	Adora2a/C3/C3ar1/Chrna1/Chrnd/Chrng/Gpr35/P2ry10/P2ry13/P2ry14/P2ry6/S1pr4/Tac4	13
rno04621	NOD-like receptor signaling pathway	8/134	178/8909	0.00533744	0.0234847	0.0181192	Ccl12/Ccl5/Gbp4/Irf7/Nlrc4/Oas2/Oas3/Trpm2	8
rno04662	B cell receptor signaling pathway	5/134	77/8909	0.00593986	0.0254979	0.0196724	Cd22/Cd79b/Dapp1/Lilrc2/Prkcb	5
rno05170	Human immunodeficiency virus 1 infection	9/134	234/8909	0.00866882	0.0363265	0.028027	Ccr5/Cd247/Cd3d/Cd3e/Cd3g/Prkcb/RT1-CE4/RT1-S3/Samhd1	9
